# Supplementary material for: X-ray characterization of core-modified N-confused fused porphyrinogen and genesis of π(σ) (anti)aromatic N-confused fused porphyrinoids
Source: Royal Society of Chemistry journal article supplement (doi:10.1039/d4qo01162g), 2024-01-01
Supplement: d4qo01162g1.pdf [file d4qo01162g1.pdf]

*Electronic Supplementary Materials for*

**X-ray Characterization of core-modified N-confused fused porphyrinogen and genesis of  $\pi(\sigma)$  (anti)Aromatic N-confused fused porphyrinoids**

Manik Jana,<sup>a</sup> Gunasekaran Velmurugan,<sup>b</sup> Peter Comba,<sup>\*b</sup> and Harapriya Rath<sup>\*a</sup>

<sup>a</sup> School of Chemical Sciences, Indian Association for The Cultivation of Science, 2A/2B Raja S. C. Mullick Road, Jadavpur, Kolkata 700 032, India, E-mail: [ichr@iacs.res.in](mailto:ichr@iacs.res.in)

<sup>b</sup>1Heidelberg University, Institute of Inorganic Chemistry and Interdisciplinary Center for Scientific Computing, Im Neuenheimer Feld 270, 69120 Heidelberg, GERMANY. E-mail: [peter.comba@aci.uni-heidelberg.de](mailto:peter.comba@aci.uni-heidelberg.de)

**Table of Contents**

|                             |         |
|-----------------------------|---------|
| Materials and Methods       | S2-S4   |
| General Synthetic Procedure | S4-S6   |
| Spectroscopic Data          | S7-S21  |
| Electrochemistry            | S21-S22 |
| X-ray crystal Data          | S23-S24 |
| Theoretical Calculations    | S25-S48 |
| X,Y,Z Coordinates           | S49-S59 |

## **Materials and Methods:**

**1.1** Electronic absorption spectra were measured with a Perkin Elmer Lambda 950 UV-visible-NIR spectrophotometer.  $^1\text{H}$  NMR spectra were recorded on a Bruker AVIII 500 MHz spectrometer, Bruker AVIII 400 MHz, Bruker DPX-300 MHz spectrometer and chemical shifts were reported as the delta scale in ppm relative to  $\text{CHCl}_3$  ( $\delta = 7.26$  ppm) and  $\text{CH}_2\text{Cl}_2$  ( $\delta = 5.32$  ppm) as internal reference for  $^1\text{H}$  and  $^{13}\text{C}$  NMR  $\text{CHCl}_3$  ( $\delta = 77.00$  ppm) and  $\text{CH}_2\text{Cl}_2$  ( $\delta = 55.00$  ppm). MALDI-TOF MS data were recorded using Bruker Daltonics flex Analyser and ESI HR-MS data were recorded using Waters QTOF Micro YA263 spectrometer. Cyclic voltammograms were recorded using a platinum working electrode, a platinum wire counter electrode and a Ag/AgCl reference electrode in Bioanalytical Systems EC epsilon. The measurements were carried out in  $\text{CH}_2\text{Cl}_2$  solution using 0.1 M  $\text{Bu}_4\text{NPF}_6$  as the supporting electrolyte at a scan rate of 0.1 V/s. Peak potentials were determined from differential pulse voltammetry experiments. The  $\text{Fc}/\text{Fc}^+$  redox couple was used as an internal standard. All solvents and chemicals were of reagent grade quality, obtained commercially and used without further purification except as noted. For spectral measurements, anhydrous dichloromethane was obtained by refluxing and distillation over  $\text{CaH}_2$ . Dry THF was obtained by refluxing and distillation over pressed Sodium metal. Thin layer chromatography (TLC) was carried out on alumina sheets coated with silica gel 60 F<sub>254</sub> (Merck 5554) and gravity column chromatography were performed using Merck Silica Gel 230-400 mesh. Aluminum Oxide (Basic) grade II was purchased from Sigma Aldrich.

### **1.2 X-Ray structure determination.**

A specimen of  $\text{C}_{50}\text{H}_{39}\text{Cl}_2\text{F}_4\text{N}_3\text{S}_2$ , approximate dimensions 0.200 mm x 0.200 mm x 0.500 mm, was used for the X-ray crystallographic analysis. The X-ray intensity data were measured ( $\lambda = 0.71073$  Å). The total exposure time was 1.09 hours. The frames were integrated with the Bruker SAINT Software package using a narrow-frame algorithm. The integration of the data using an monoclinic unit cell yielded a total of 70188 reflections to a maximum  $\theta$  angle of  $27.55^\circ$  (0.77 Å resolution), of which 10045 were independent (average redundancy 6.987, completeness = 98.7%,  $R_{\text{int}} = 5.57\%$ ,  $R_{\text{sig}} = 6.12\%$ ) and 6830 (67.99%) were greater than  $2\sigma$  ( $F^2$ ). The final cell constants of  $a = 24.971(3)$  Å,  $b = 14.4865(19)$  Å,  $c = 12.3630(15)$  Å, volume =  $4399.9(9)$  Å<sup>3</sup>, are based upon the refinement of the XYZ-centroids of 9939 reflections above  $20\sigma$  ( $I$ ) with  $4.884^\circ < 2\theta < 54.83^\circ$ . Data were corrected for absorption effects using the Multi-Scan method (TWINABS). The ratio of minimum to maximum apparent transmission was 0.757. The calculated minimum and maximum transmission coefficients (based on crystal size) are 0.8650 and 0.9430. The structure was solved and refined using the Bruker SHELXTL Software Package, using the space group P 1 21/c1 with  $Z = 4$  for the formula unit,  $\text{C}_{50}\text{H}_{39}\text{Cl}_2\text{F}_4\text{N}_3\text{S}_2$ . The final anisotropic full-matrix least-squares refinement on  $F^2$  with 556 variables converged at  $R1 = 7.23\%$ , for the observed data and  $wR2 = 18.95\%$  for all data. The goodness-of-fit was 1.040. The largest peak in the final difference electron density synthesis was  $0.393$  e/Å<sup>3</sup> and the largest hole was  $-0.660$  e/Å<sup>3</sup> with an RMS deviation of  $0.072$  e/Å<sup>3</sup>. On the basis of the final model, the calculated density was  $1.348$  g/cm<sup>3</sup> and  $F(000)$ , 1848 e<sup>-</sup>.

### **1.3 Theoretical Calculation**

All the calculations have been computed using the Gaussian16 program<sup>1</sup> at B3LYP/6-31G(d,p) level of theory.<sup>2</sup> The electronic absorption spectra, singlet vertical excitation energies and oscillator strengths on the ground state optimized geometries have been computed using time dependent density functional theory (TD-DFT).<sup>3</sup> We have used dichloromethane as solvent using the polarized continuum model (PCM).<sup>4</sup> The contribution of various fragments of the macrocycle have been analyzed using the QMForge program.<sup>5</sup> The nucleus independent chemical shift (NICS) values were calculated at the non-weighted mass of conjugation  $\pi$ -pathway of the macrocycles (1-8 Å above and below the molecular plane).<sup>6</sup> The NICS values are scanned along the trajectory orthogonal to the plane of the macrocycle based on the Stranger method.<sup>7</sup> The NMR shielding tensors were computed using the Gauge-Independent Atomic Orbital (GIAO) at the non-weighted mass of conjugation  $\pi$ -pathway of the macrocycle.<sup>8</sup> On the other hand, the harmonic oscillator model of aromaticity (HOMA) index, electron localization function (ELF), multi center index (MCI), AV1245, AVmin and localized orbital locator (LOL) topology analysis, the NBO analysis based decomposition of the Wiberg bond index has been calculated using Multiwfn.<sup>9</sup> The anisotropy of the current (induced) density (ACID) has been done using ACID plot.<sup>10</sup>

## References:

1. M. Frisch, G. Trucks, H. Schlegel, G. Scuseria, M. Robb, J. Cheeseman, G. Scalmani, V. Barone, B. Mennucci, G. Petersson, H. Nakatsuji, M. Caricato, X. Li, H. Hratchian, A. Izmaylov, J. Bloino, G. Zheng, J. Sonnenberg, M. Hada, M. Ehara, K. Toyota, R. Fukuda, J. Hasegawa, M. Ishida, T. Nakajima, Y. Honda, O. Kitao, H. Nakai, T. Vreven, J. Montgomery, Jr, J. E. Peralta, F. Ogliaro, M. Bearpark, J. J. Heyd, E. Brothers, K. N. Kudin, V. Staroverov, R. Kobayashi, J. Normand, K. Raghavachari, A. Rendell, J. Burant, S. Iyengar, J. Tomasi, M. Cossi, N. Rega, N. Millam, M. Klene, J. E. Knox, J. B. Cross, V. Bakken, C. Adamo, J. Jaramillo, R. Gomperts, R. Stratmann, O. Yazyev, A. Austin, R. Cammi, C. Pomelli, J. Ochterski, R. L. Martin, K. Morokuma, V. Zakrzewski, G. Voth, P. Salvador, J. Dannenberg, S. Dapprich, A. Daniels, Ö. Farkas, J. Foresman, J. Ortiz, J. Cioslowski and D. Fox, Gaussian 16, revision C. 01, Gaussian, Inc., Wallingford, CT 2010.
2. (a) A. D. Becke, Density-functional thermochemistry. III. The role of exact exchange, *J. Chem. Phys.*, 1993, **98**, 5648-5652; (b) J. P. Perdew, Density-functional approximation for the correlation energy of the inhomogeneous electron gas, *Phys. Rev. B*, 1986, **33**, 8822-8824; (c) A. D. Becke, Density-functional exchange-energy approximation with correct asymptotic behaviour, *Phys. Rev. A*, 1988, **38**, 3098-3100; (d) C. Lee, W. Yang and R. G. Parr, Development of the Colle-Salvetti correlation-energy formula into a functional of the electron density, *Phys. Rev. B*, 1988, **37**, 785-789.
3. (a) E. Runge and E. K. U. Gross, Density-Functional Theory for Time-Dependent Systems, *Phys. Rev. Lett.*, 1984, **52**, 997-1000; (b) R. E. Stratmann, G. E. Scuseria and M. J. Frisch, An efficient implementation of time-dependent density-functional theory for the calculation of excitation energies of large molecules, *J. Chem. Phys.*, 1998, **109**, 8218-8224; (c) R. Bauernschmitt and R. Ahlrichs, Treatment of electronic excitations within the adiabatic approximation of time dependent density functional theory, *Chem. Phys. Lett.*, 1996, **256**, 454-464.
4. (a) M. Cossi, G. Scalmani, N. Rega and V. Barone, New developments in the polarizable continuum model for quantum mechanical and classical calculations on molecules in solution, *J. Chem. Phys.*, 2002, **117**, 43-54; (b) E. Cancès, B. Mennucci and J. Tomasi, A new integral equation formalism for the polarizable continuum model: Theoretical background and applications to isotropic and anisotropic dielectrics, *J. Chem. Phys.*, 1997, **107**, 3032-3041; (c) B. Mennucci and J. Tomasi, Continuum solvation models: A new approach to the problem of solute's charge distribution and cavity boundaries, *J. Chem. Phys.*, 1997, **106**, 5151-5158.
5. (a) A. Tenderholt, "QMForge: A Program to Analyze Quantum Chemistry Calculations", Version 2.3.2, <http://qmforge.sourceforge.net>; (b) G. Velmurugan and P. Venuvanalingam, Luminescent Re(I) terpyridine complexes for OLEDs: what does the DFT/TD-DFT probe reveal?, *Dalton Trans.*, 2015, **44**, 8529-8542; (c) G.

- Velmurugan, B. K. Ramamoorthi and P. Venuvanalingam, Are Re(I) phenanthroline complexes suitable candidates for OLEDs? Answers from DFT and TD-DFT investigations, *Phys. Chem. Chem. Phys.*, 2014, **16**, 21157-21171; (d) G. Velmurugan, S. A. Vedha and P. Venuvanalingam, Computational evaluation of optoelectronic and photophysical properties of unsymmetrical distyrylbiphenyls, *RSC Adv.*, 2014, **4**, 53060-53071.
- (a) P. v. R. Schleyer, C. Maerker, A. Dransfeld, H. Jiao and N. J. R. V. E. Hommea, Nucleus-Independent Chemical Shifts: A Simple and Efficient Aromaticity Probe, *J. Am. Chem. Soc.*, 1996, **118**, 6317-6318. (b) K. K. Zborowski, I. Alkorta, J. Elguero and L. M. Proniewicz, Calculation of the HOMA model parameters for the carbon–boron bond, *Struct. Chem.*, 2012, **23**, 595-600.
  - A. Stanger, Nucleus-Independent Chemical Shifts (NICS): Distance Dependence and Revised Criteria for Aromaticity and Antiaromaticity, *J. Org. Chem.*, 2006, **71**, 883-893.
  - K. Wolinski, J. F. Hinton and P. Pulay, Efficient Implementation of the Gauge-Independent Atomic Orbital Method for NMR Chemical Shift Calculations, *J. Am. Chem. Soc.*, 1990, **112**, 8251-8260.
  - (a) S. Ostrowski and J. C. Dobrowolski, What does the HOMA index really measure?, *RSC Adv.*, 2014, **4**, 44158-44161; (b) T. Lu and F. Chen, Multiwfn: A multifunctional wavefunction analyzer, *J. Comput. Chem.*, 2012, **33**, 580-592.
  - (a) D. Geuenich, K. Hess, F. Köhler and R. Herges, Anisotropy of the Induced Current Density (ACID), a General Method To Quantify and Visualize Electronic Delocalization, *Chem. Rev.*, 2005, **105**, 3758-3772; (b) R. Herges and D. Geuenich, Delocalization of Electrons in Molecules, *J. Phys. Chem. A*, 2001, **105**, 3214-3220.

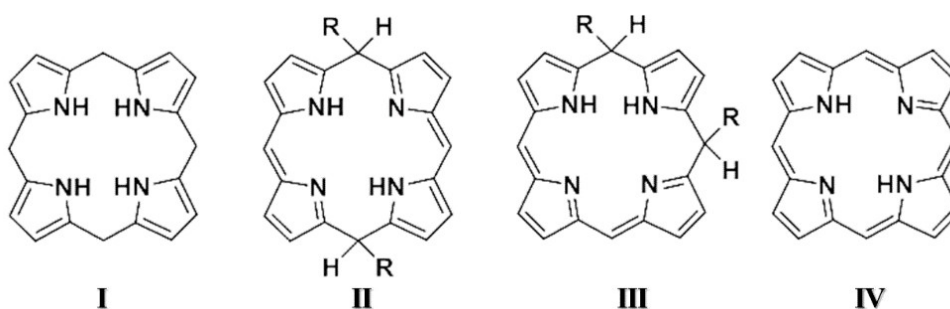

**Chart S1** Structural relationship between porphyrinogen (I)-calixphyrin (II, III)-porphyrin(IV)

#### 1.4 Synthesis:

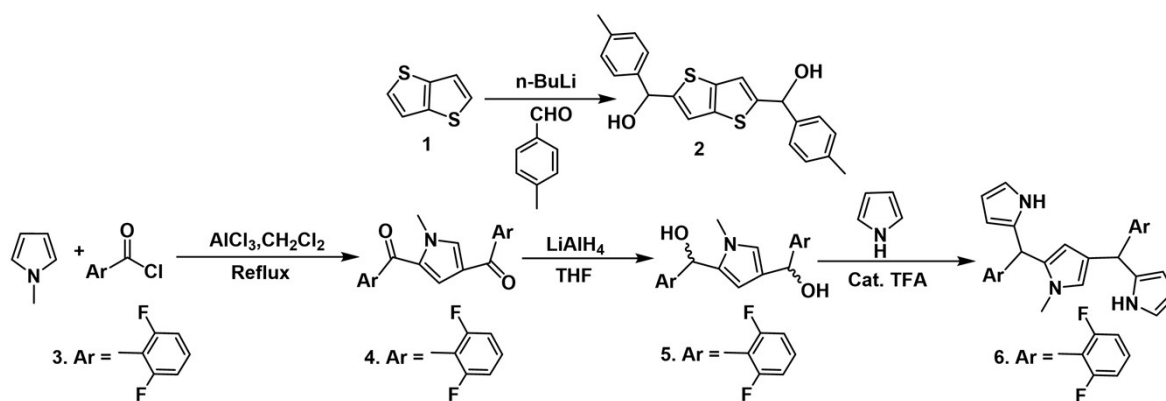

**Scheme S1.** Synthesis of all precursors used for the macrocycles reported in the manuscript

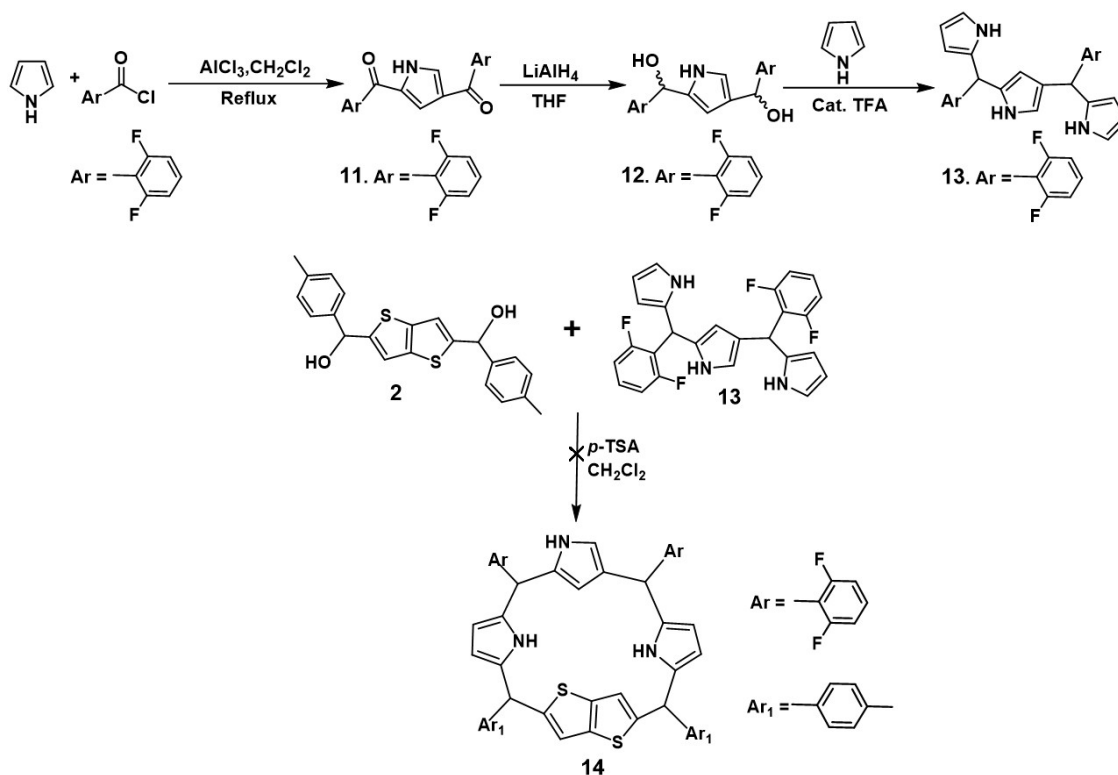

**Scheme S2.** Attempted Synthesis of macrocycle **14**

#### General Synthesis of **7**:

Tripyrrane **6** (0.463 g, 1 mmol) and diol **2** (0.380 g, 1 mmol) were taken in a round bottom flask, to it 100 mL of dry DCM was added and stirred for 15 minutes under nitrogen atmosphere to get a clear solution. After that  $p$ -Toluenesulfonic acid (0.035 g, 0.185 mmol) was added to the reaction mixture and stirred for 120 minutes under dark condition. After complete removal of solvent from crude mixture by rotary evaporator, the compound was purified using basic alumina followed by repeated silica gel (200–400 mesh) chromatographic separation and preparative thin layer chromatography (PTLC) yielded 60% of extra pure macrocycle **7** as an orange solid.

Compound **7**: Yield. ~420 mg (60%).  $R_f = 0.4$  ( $\text{CH}_2\text{Cl}_2/\text{Hexane} = (1:4)$ ).  $\text{Mp} > 350^\circ\text{C}$

HR-ESI-TOF MS ( $m/z$ ): calc. for  $[\text{M} + \text{H}]^+$   $[\text{C}_{49}\text{H}_{38}\text{F}_4\text{N}_3\text{S}_2]^+$  808.2443, found 808.2444.

Elemental analysis Calc. for  $\text{C}_{49}\text{H}_{37}\text{F}_4\text{N}_3\text{S}_2$ : C, 72.84; H, 4.62; N, 5.20. Found: C, 72.91; H, 4.67; N, 5.18.

UV-vis-NIR ( $\text{CH}_2\text{Cl}_2$ ,  $\lambda$  [nm], ( $\epsilon$  [ $\text{M}^{-1}\text{cm}^{-1} \times 10^4$ ]), 298K): 461 (1.26).

[**7**]  $^1\text{H}$  NMR (400 MHz,  $\text{CDCl}_3$ , 298K)  $\delta$ : 7.99 (s, 1H), 7.75 (s, 1H), 7.60 (d,  $J = 8.0$  Hz, 2H), 7.29 (d,  $J = 8.0$  Hz, 2H), 7.23 – 7.18 (m, 2H), 7.15 (d,  $J = 8.0$  Hz, 2H), 7.07 (d,  $J = 8.0$  Hz, 2H), 7.00 (s, 1H), 6.94 – 6.78 (m, 4H), 6.68 (s, 1H), 6.12 (s, 1H), 6.06 (d,  $J = 4.0$  Hz, 1H), 6.04 (d,  $J = 4.0$  Hz, 1H), 5.85 (s, 1H), 5.78 (d,  $J = 4.0$  Hz, 1H), 5.74 (d,  $J = 4.0$  Hz, 1H), 5.70 (s, 1H), 5.65 (s, 1H), 5.59 (s, 1H), 5.50 (s, 1H), 3.05 (s, 3H), 2.40 (s, 3H), 2.30 (s, 3H).

$^{13}\text{C}$  NMR (101 MHz,  $\text{CDCl}_3$ , 298K)  $\delta$ : 151.02, 141.83, 139.33, 136.98, 136.44, 135.94, 135.81, 134.56, 132.54, 131.50, 129.83, 129.55, 129.44, 129.24, 128.90, 128.79, 128.52, 128.26, 127.69, 126.51, 126.40, 126.25, 125.83, 120.93, 119.79, 118.54, 117.52, 115.75, 112.81, 112.38, 112.35, 112.13, 112.11, 111.63, 111.60, 111.49, 111.37, 109.65, 109.31, 107.19, 46.85, 37.27, 34.42, 33.00, 29.86, 21.38, 21.10.

#### General Synthesis of **9**:

Porphyrinogen **7** (20 mg, 0.0248 mmol) was taken in a round bottom flask; to it 20 mL of dry DCM was added and stirred for 15 minutes to get a clear solution. Chloranil (15.2 mg, 0.062 mmol) was added to the reaction mixture and stirred for 60 minutes. After complete removal of solvent from crude mixture by rotary evaporator, the compound was purified using basic alumina followed by preparative thin layer chromatography (PTLC) leading to extra pure macrocycle **9** as an air-stable green solid in 80% yields.

Compound **9**: Yield. ~16.5 mg (80%).  $R_f = 0.3$  ( $\text{CH}_2\text{Cl}_2/\text{Hexane} = (3:2)$ ).  $\text{Mp} > 350^\circ\text{C}$

HR-ESI-TOF MS ( $m/z$ ): calc. for  $[\text{M}]^+$   $[\text{C}_{49}\text{H}_{29}\text{F}_4\text{N}_3\text{OS}_2]^+$  815.1688, found 815.1689. Elemental analysis  
Calc. for  $\text{C}_{49}\text{H}_{29}\text{F}_4\text{N}_3\text{OS}_2$ : C, 72.13; H, 3.58; N, 5.15. Found: C, 72.16; H, 3.59; N, 5.12.

UV-vis-NIR ( $\text{CH}_2\text{Cl}_2$ ,  $\lambda$  [nm], ( $\epsilon$  [ $\text{M}^{-1}\text{cm}^{-1} \times 10^4$ ]), 298K): 329 (3.66), 455 (5.44), 678 (1.36).

[**9**]:  $^1\text{H}$  NMR (400 MHz,  $\text{CD}_2\text{Cl}_2$ , 298K)  $\delta$ : 7.57 (d,  $J = 8.0$  Hz, 2H), 7.52 (d,  $J = 8.0$  Hz, 2H), 7.35 (d,  $J = 8.0$  Hz, 2H), 7.28 (d,  $J = 8.0$  Hz, 2H), 7.25 (s, 1H), 7.01 (d,  $J = 4.0$  Hz, 1H), 6.94 (d,  $J = 8.0$  Hz, 1H), 6.89 - 6.92 (m, 6H), 6.88 (d,  $J = 4.0$  Hz, 1H), 6.67 (d,  $J = 4.0$  Hz, 1H), 6.19 (d,  $J = 8.0$  Hz, 1H), 3.53 (s, 3H), 2.47 (s, 3H), 2.39 (s, 3H).  $^{13}\text{C}$  NMR (101 MHz,  $\text{CD}_2\text{Cl}_2$ , 298K)  $\delta$ : 145.53, 145.35, 140.23, 137.99, 137.25, 136.80, 133.81, 132.89, 132.32, 131.08, 130.97, 130.74, 130.07, 129.67, 129.55, 129.30, 128.66, 127.58, 126.45, 124.42, 120.63, 112.91, 112.04, 111.84, 111.53, 77.23, 37.73, 30.06, 23.06, 21.50, 21.31.

#### General Synthesis of **10**:

Porphyrinogen **7** (20 mg, 0.0248 mmol) was taken in a round bottom flask; to it 20 mL of dry DCM was added and stirred for 15 minutes to get a clear solution. DDQ (14 mg, 0.062 mmol) was added to the reaction mixture and stirred for 15 minutes. After complete removal of solvent from crude mixture by rotary evaporator, the compound was purified using basic alumina followed by preparative thin layer chromatography (PTLC) leading to extra pure macrocycle **10** as dark brown solid in 75% yields.

Compound **10**: Yield. ~15.3 mg (75%).  $R_f = 0.2$  ( $\text{CH}_2\text{Cl}_2/\text{Hexane} = (4:1)$ ).  $\text{Mp} > 350^\circ\text{C}$

HR-ESI-TOF MS ( $m/z$ ): calc. for  $[\text{M}]^+$   $[\text{C}_{49}\text{H}_{29}\text{F}_4\text{N}_3\text{O}_2\text{S}_2]^+$  831.1637, found. 831.1639. Elemental analysis  
Calc. for  $\text{C}_{49}\text{H}_{29}\text{F}_4\text{N}_3\text{O}_2\text{S}_2$ : C, 70.75; H, 3.51; N, 5.05. Found: C, 70.78; H, 3.59; N, 5.01.

UV-vis-NIR ( $\text{CH}_2\text{Cl}_2$ ,  $\lambda$  [nm], ( $\epsilon$  [ $\text{M}^{-1}\text{cm}^{-1} \times 10^4$ ]), 298K): 329 (1.96), 426 (3.13), 647(0.09).

[**10**]:  $^1\text{H}$  NMR (400 MHz,  $\text{CD}_2\text{Cl}_2$ , 298K)  $\delta$ : 7.55 (d,  $J = 8.0$  Hz, 2H), 7.39 – 7.34 (m, 2H), 7.28 (d,  $J = 8.0$  Hz, 2H), 7.23 – 7.17 (m, 4H), 7.00 (s, 1H), 6.98 – 6.89 (m, 4H), 6.75 (t,  $J = 8.0$  Hz, 2H), 6.60 (s, 1H), 6.12 (d,  $J = 4.0$  Hz, 1H), 6.10 (d,  $J = 4.0$  Hz, 1H), 3.85 (s, 3H), 2.44 (s, 3H), 2.43 (s, 3H).  $^{13}\text{C}$  NMR (101 MHz,  $\text{CD}_2\text{Cl}_2$ , 298K)  $\delta$ : 177.05, 171.75, 161.87, 160.22, 160.10, 160.05, 158.44, 158.39, 144.35, 142.22, 138.80, 138.03, 137.94, 136.72, 135.06, 134.99, 134.40, 131.55, 131.35, 131.04, 130.90, 130.48,

129.81, 129.09, 128.96, 128.66, 128.37, 126.73, 126.05, 123.29, 123.02, 122.59, 121.91, 121.27, 117.48, 116.87, 113.94, 111.76, 111.43, 111.29, 106.37, 37.54, 30.62, 21.01, 20.96.

## 2. Supplementary Data:

### 2.1 Mass Spectra

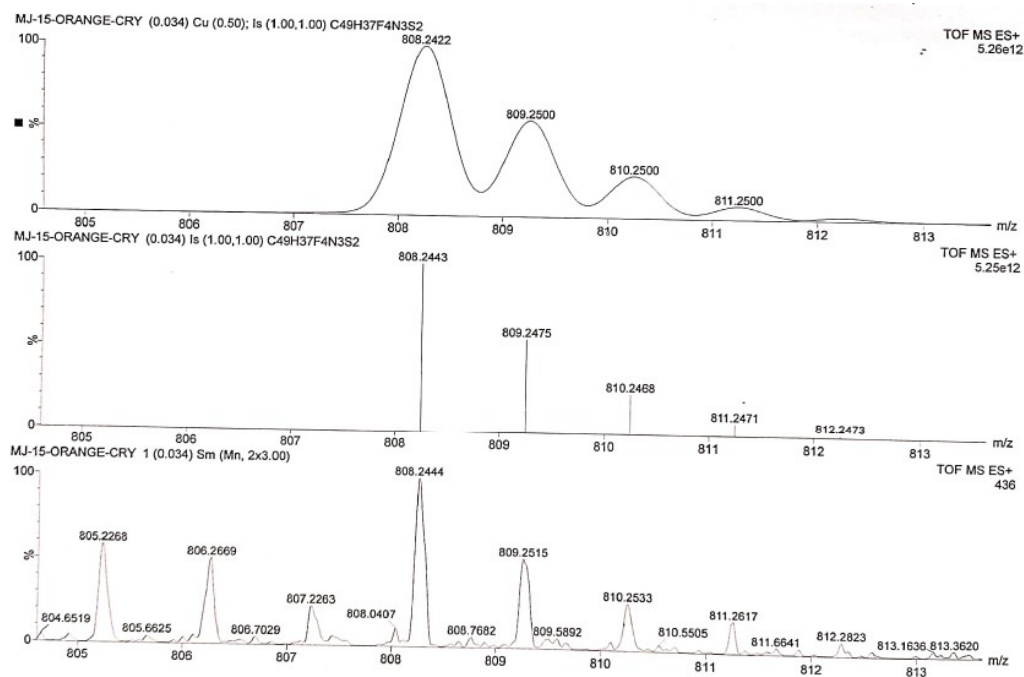

Fig. S1 HRMS Spectra of 7

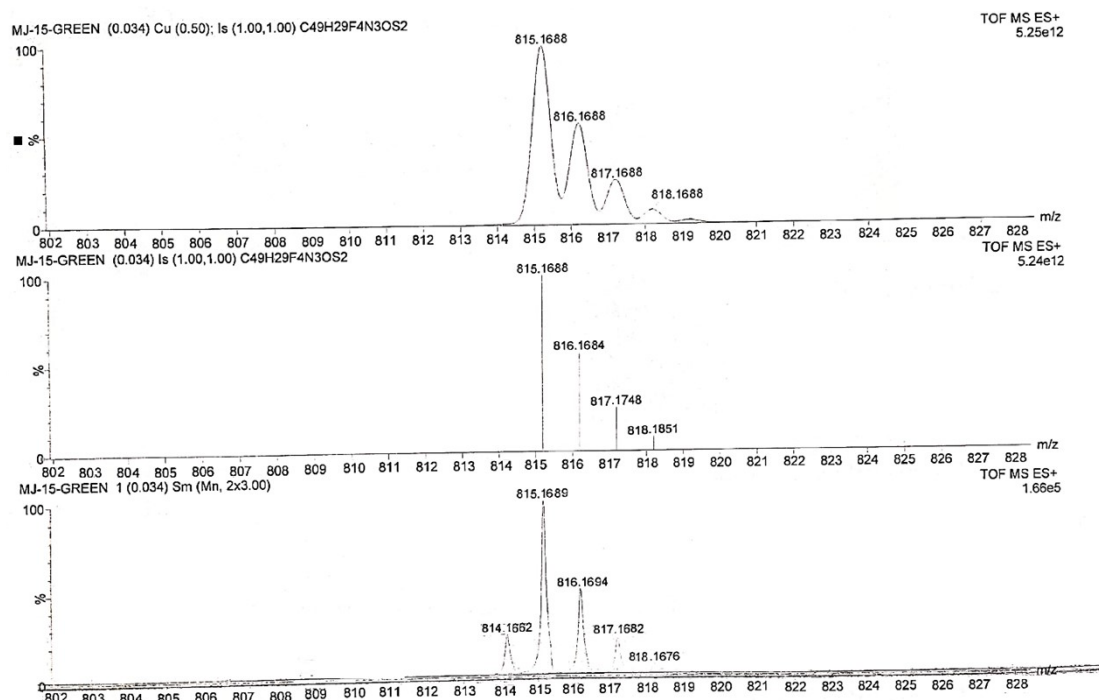

Fig. S2 HRMS Spectra of 9

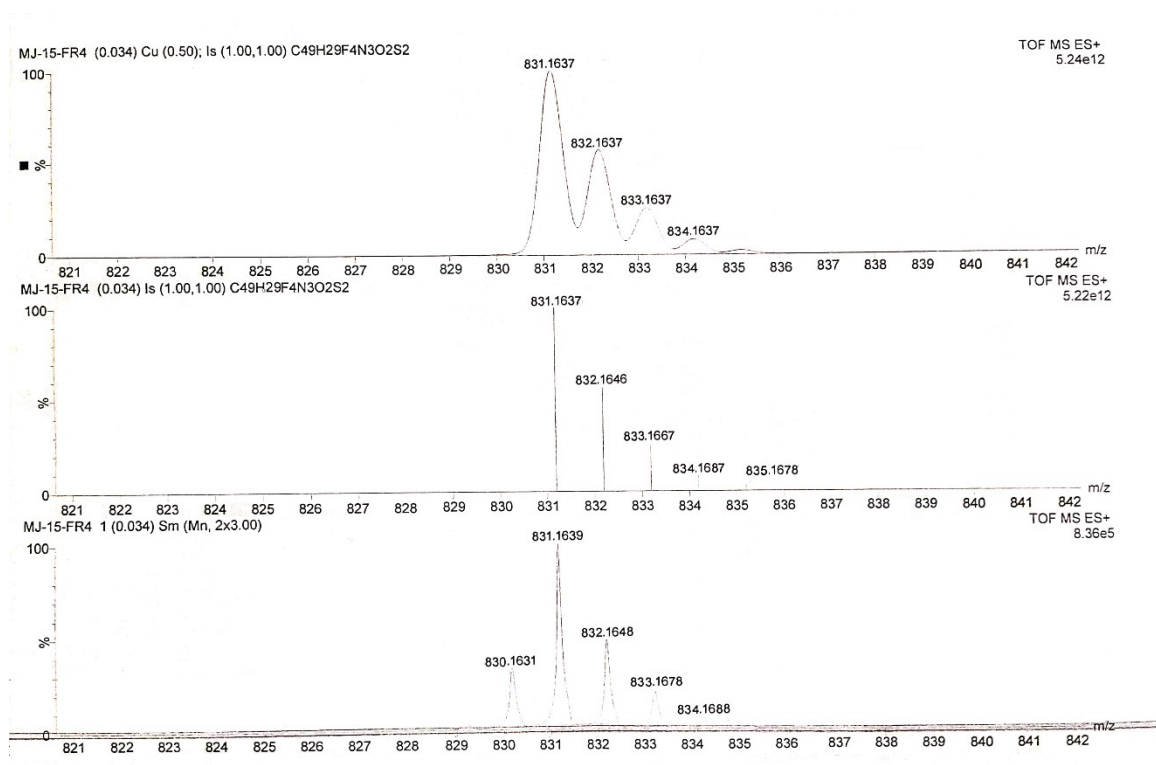

Fig.S3 HRMS Spectra of 10

2.2 IR spectra:

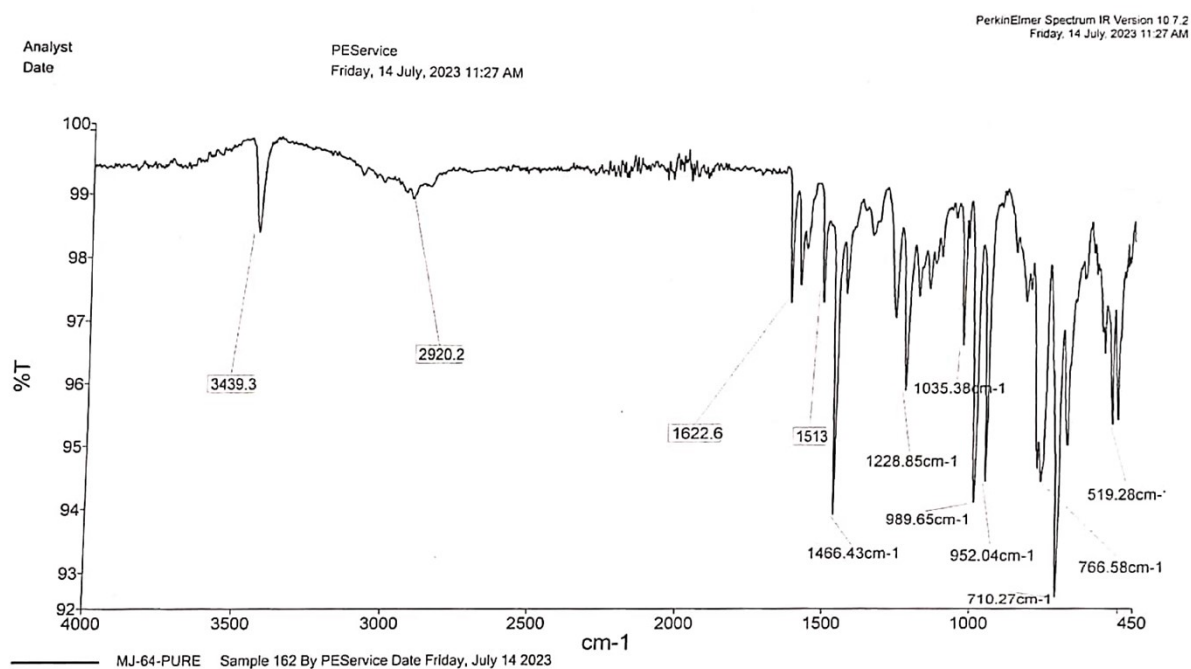

Fig. S4 IR Spectrum of 7



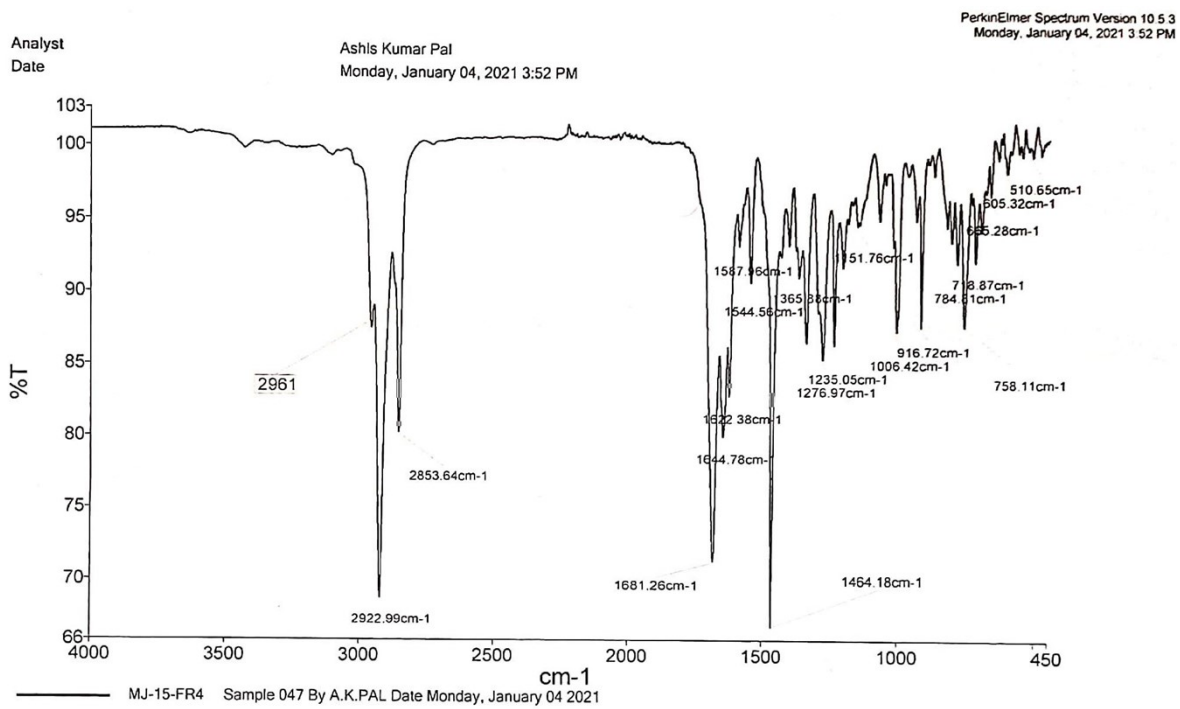

**Fig. S5 IR Spectrum of 9**

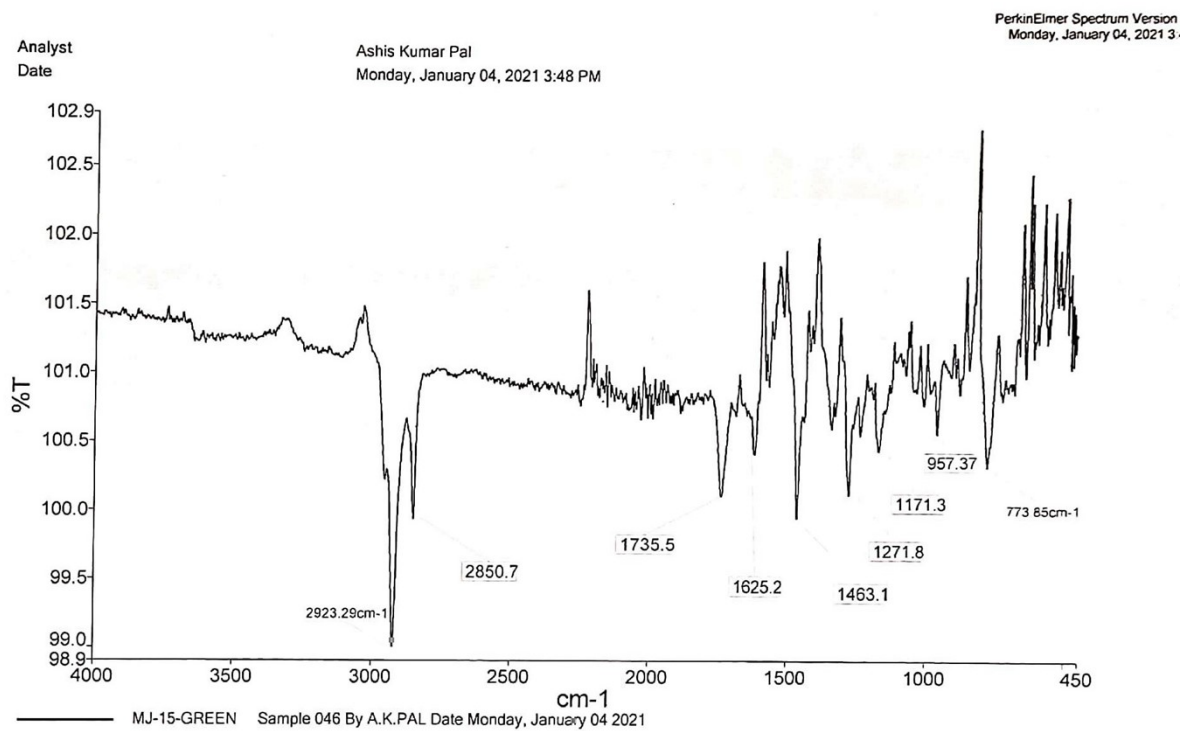

**Fig. S6 IR Spectrum of 10**

### 2.3 UV-vis spectra:

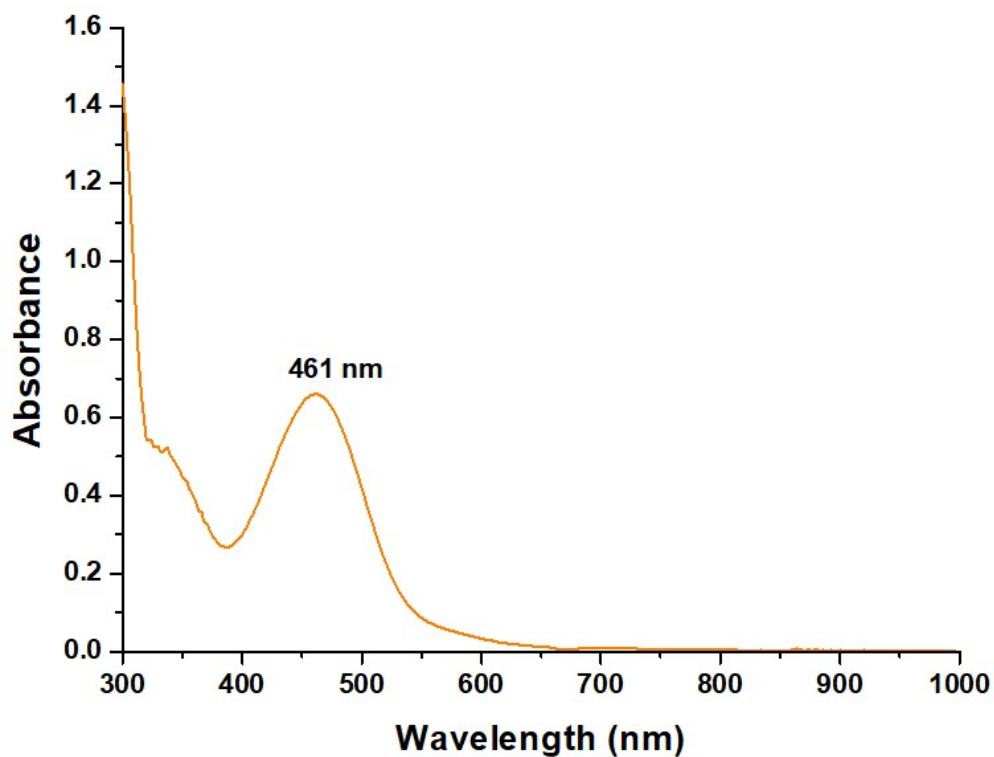

Fig. S7 UV-vis Spectrum of **7** in  $\text{CH}_2\text{Cl}_2$  at 298 K

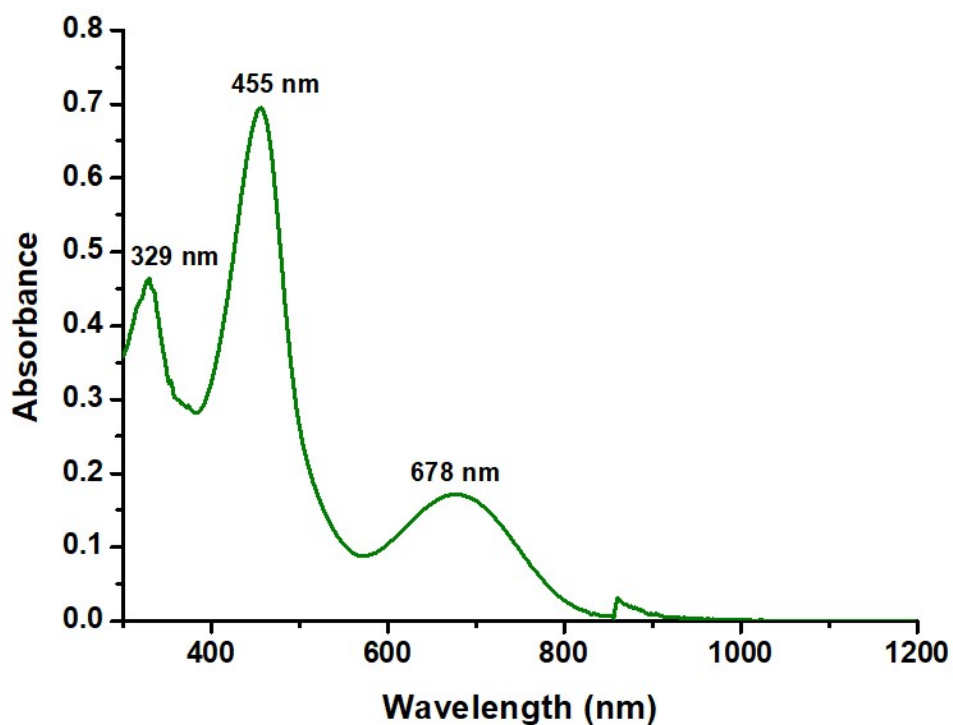

Fig. S8 UV-vis Spectra of **9** in  $\text{CH}_2\text{Cl}_2$  at 298 K

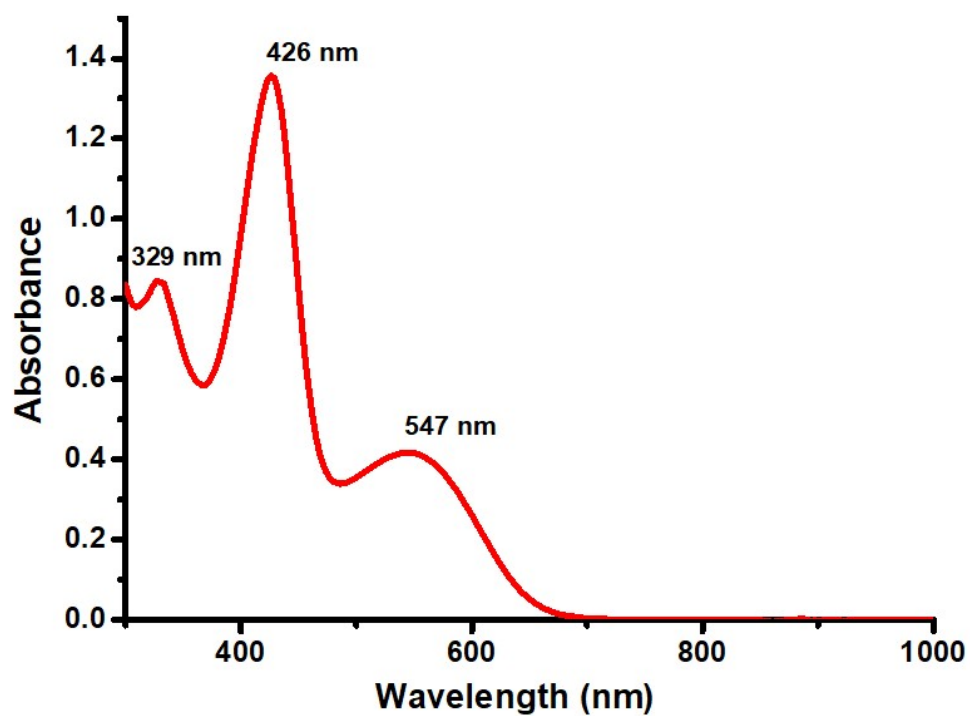

Fig. S9 UV-vis Spectra of **10** in CH<sub>2</sub>Cl<sub>2</sub> at 298 K

## 2.4 NMR spectra:

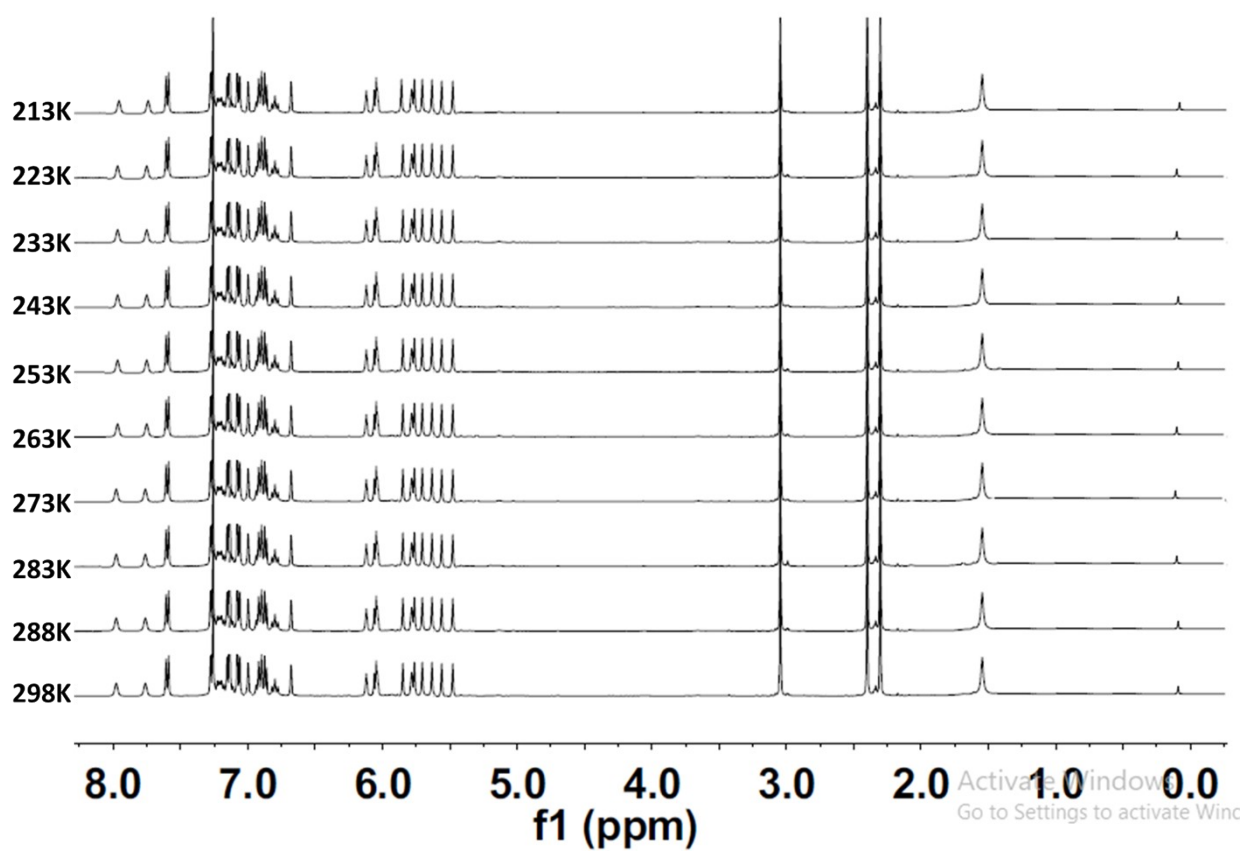

Fig. S10 Low VT <sup>1</sup>H NMR spectra of **7** in CDCl<sub>3</sub>

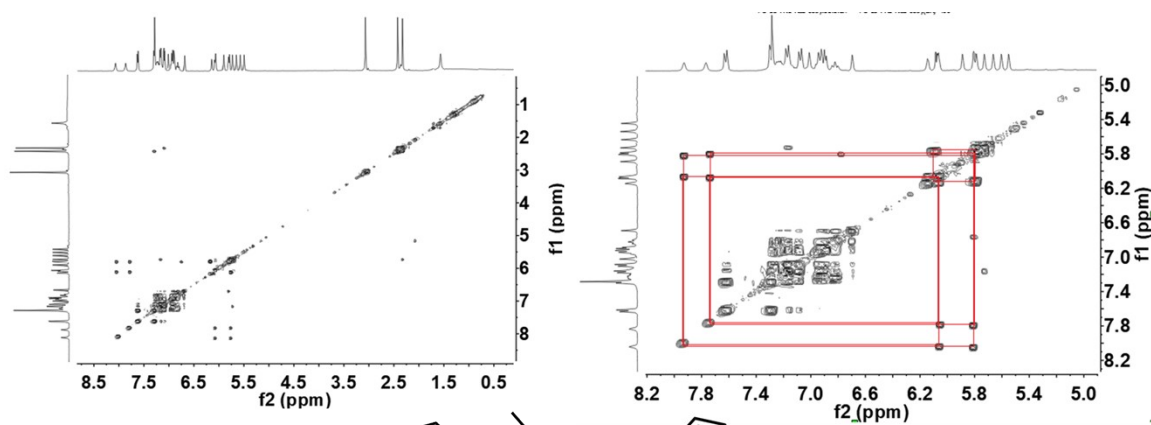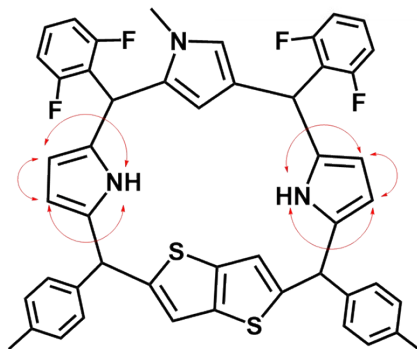

**Fig. S11**  $^1\text{H}$  - $^1\text{H}$  2D COSY NMR spectra of **7** in  $\text{CDCl}_3$  at 298 K

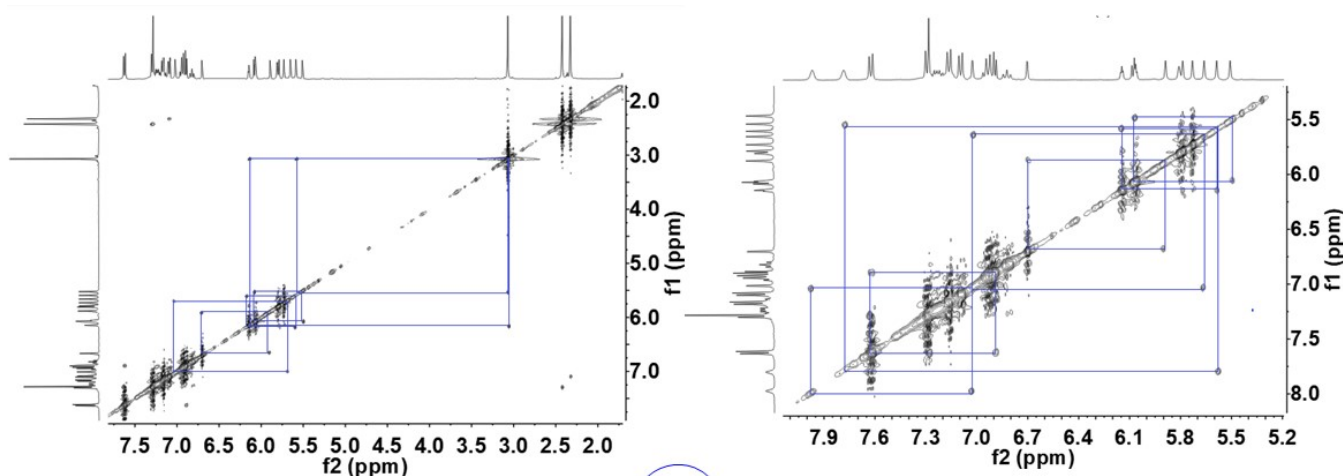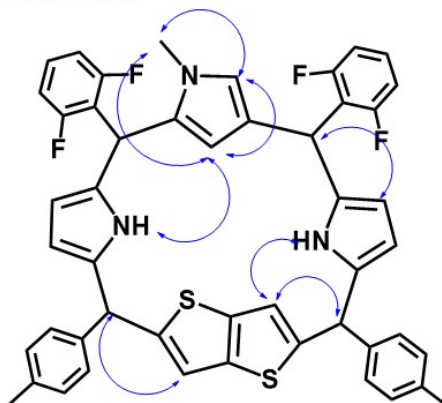

**Fig. S12**  $^1\text{H}$  - $^1\text{H}$  2D ROESY NMR spectra of **7** in  $\text{CDCl}_3$  at 298 K

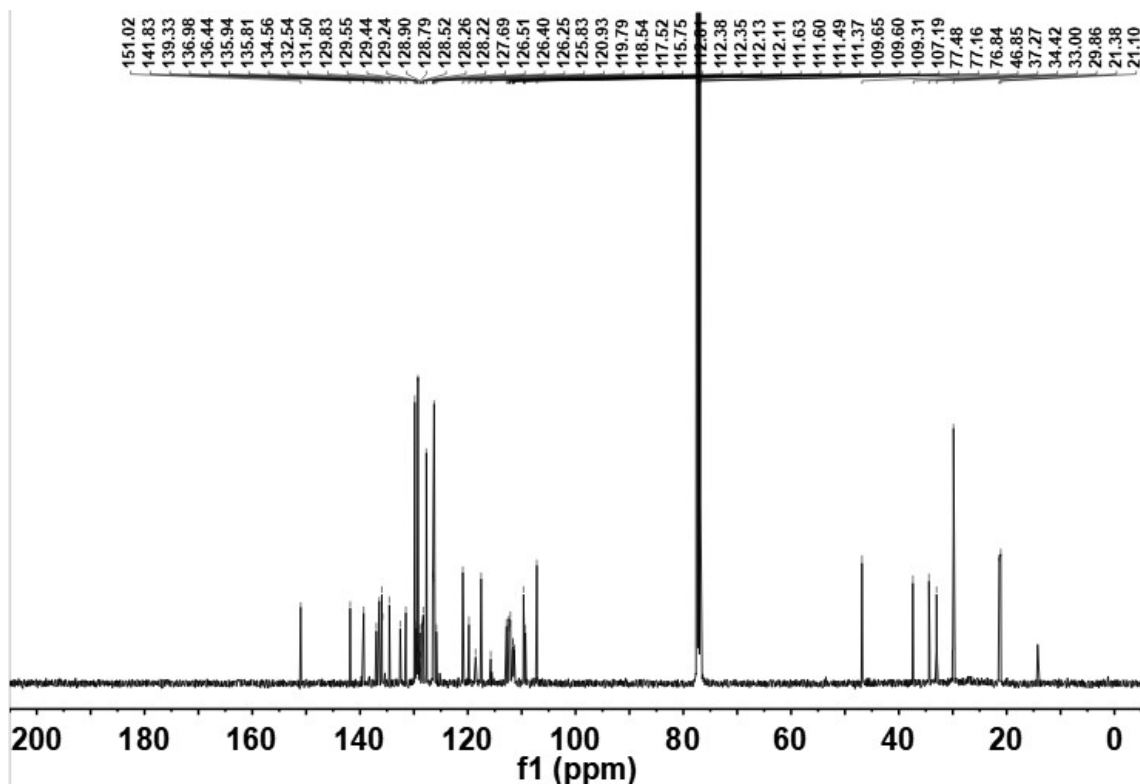

Fig. S13  $^{13}\text{C}$  NMR spectra of **7** in  $\text{CDCl}_3$  at 298 K

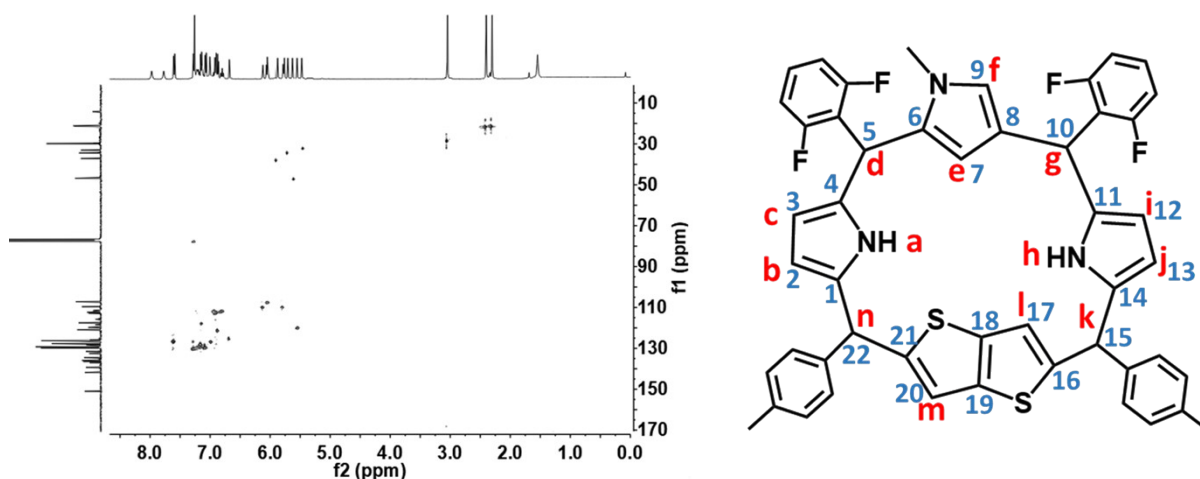

| $^1\text{H}$ (ppm) | $^{13}\text{C}$ (ppm) | $^1\text{H}$ (ppm)  | $^{13}\text{C}$ (ppm) |
|--------------------|-----------------------|---------------------|-----------------------|
| 7.99 (h)           | -                     | 5.78, 5.74 (j, b)   | 109.65                |
| 7.75 (a)           | -                     | 5.70 (d)            | 33.00                 |
| 7.00 (l)           | 128.20                | 5.65 (k)            | 46.85                 |
| 6.68 (m)           | 126.51                | 5.59 (e)            | 120.93                |
| 6.12 (f)           | 109.31                | 5.50 (g)            | 34.42                 |
| 6.06, 6.04 (i, c)  | 107.19                | 3.05 (N-Me)         | 29.86                 |
| 5.85 (n)           | 37.27                 | 2.40, 2.30 (Tol-Me) | 21.38, 21.10          |

Fig. S14  $^1\text{H}$  - $^{13}\text{C}$  2D HSQC NMR spectra of **7** in  $\text{CDCl}_3$  at 298 K

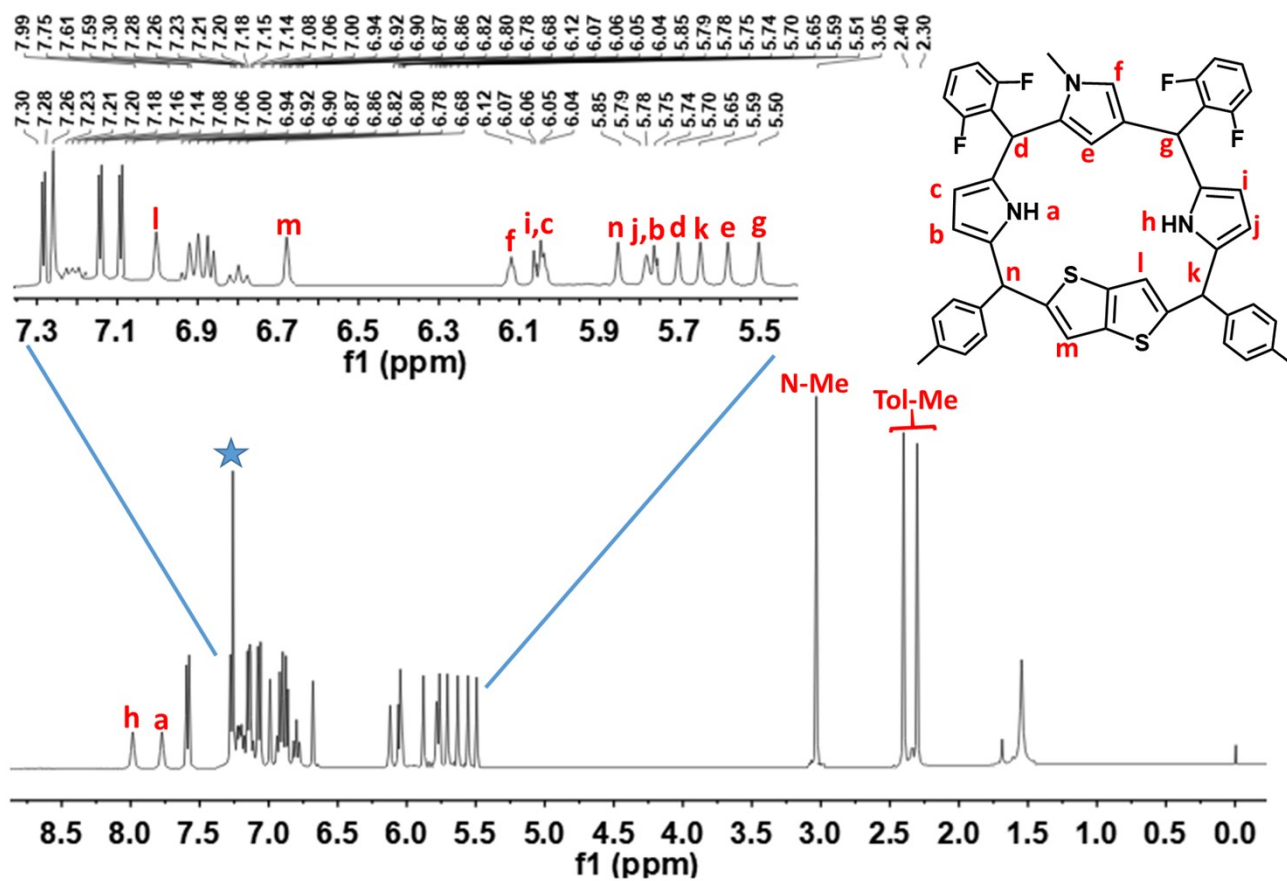

Fig.S15 Complete  $^1\text{H}$  NMR spectral assignment of **7** in  $\text{CDCl}_3$  at 298 K

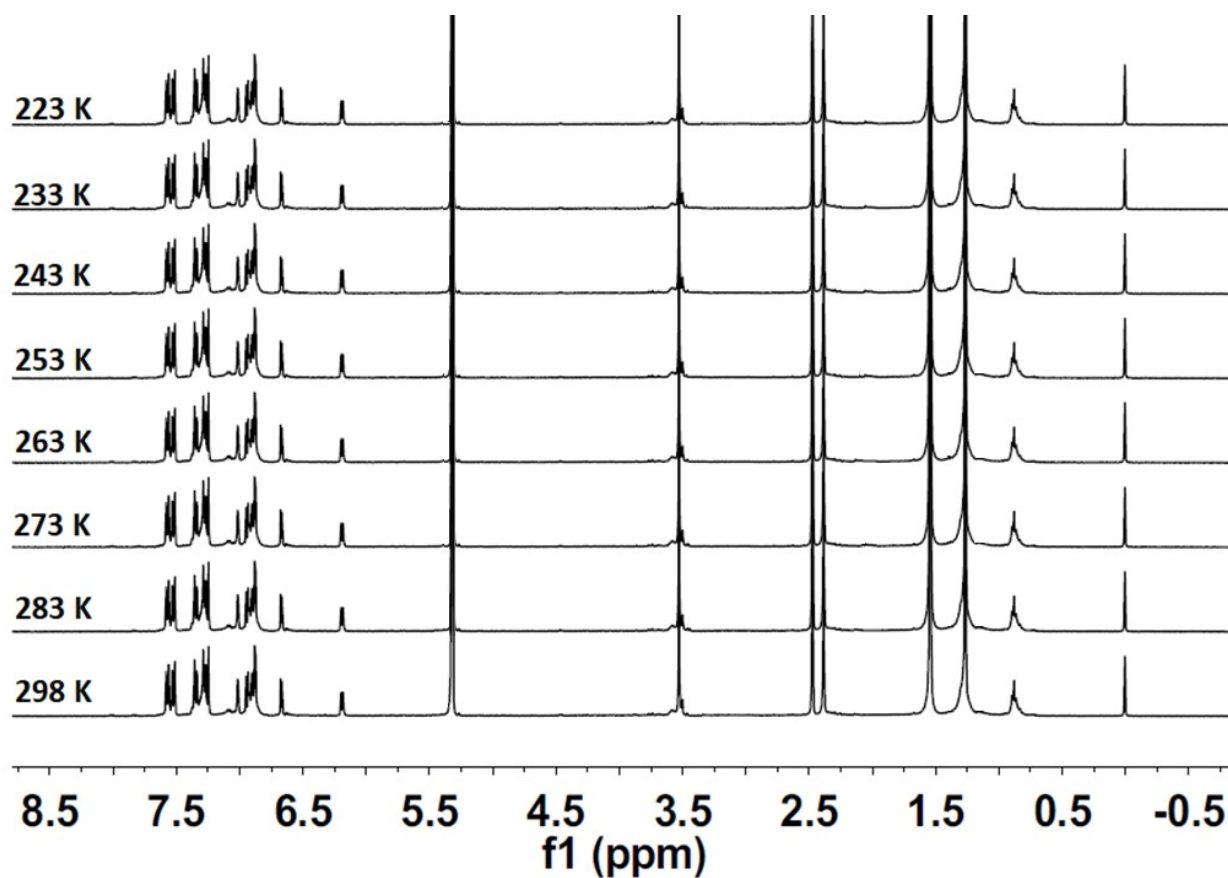

Fig. S16 Low VT  $^1\text{H}$  NMR spectra of **9** in  $\text{CD}_2\text{Cl}_2$

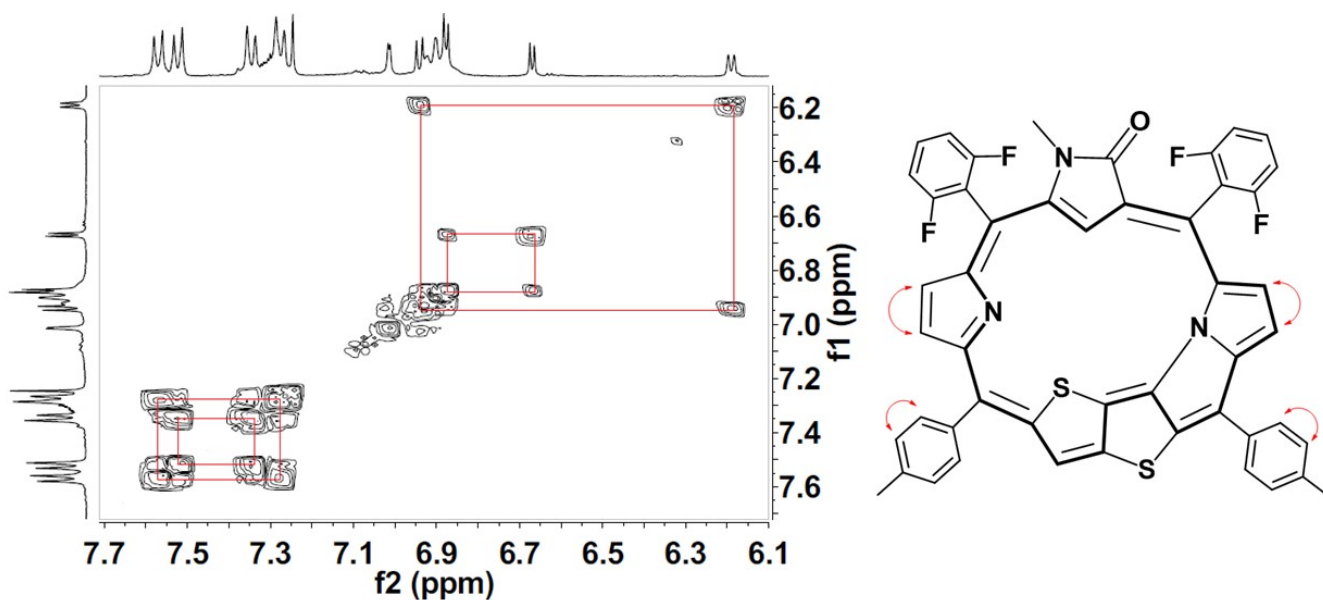

**Fig. S17**  $^1\text{H}$ - $^1\text{H}$  2D COSY NMR spectra of **9** in  $\text{CD}_2\text{Cl}_2$  at 298 K

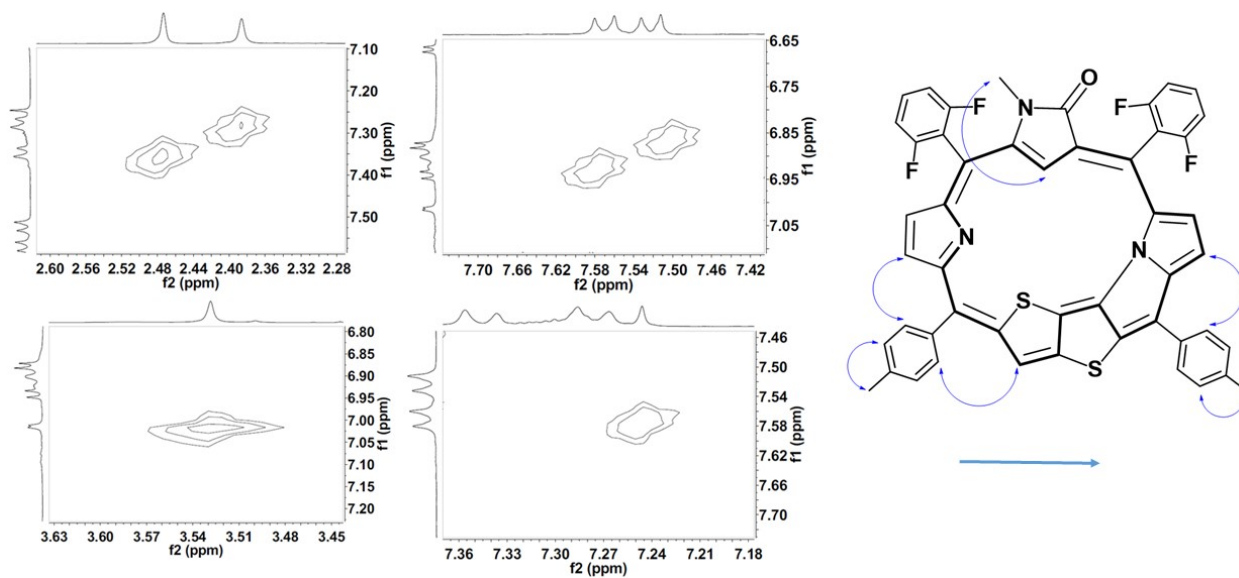

**Fig. S18**  $^1\text{H}$ - $^1\text{H}$  2D ROESY NMR spectra of **9** in  $\text{CD}_2\text{Cl}_2$  at 298 K

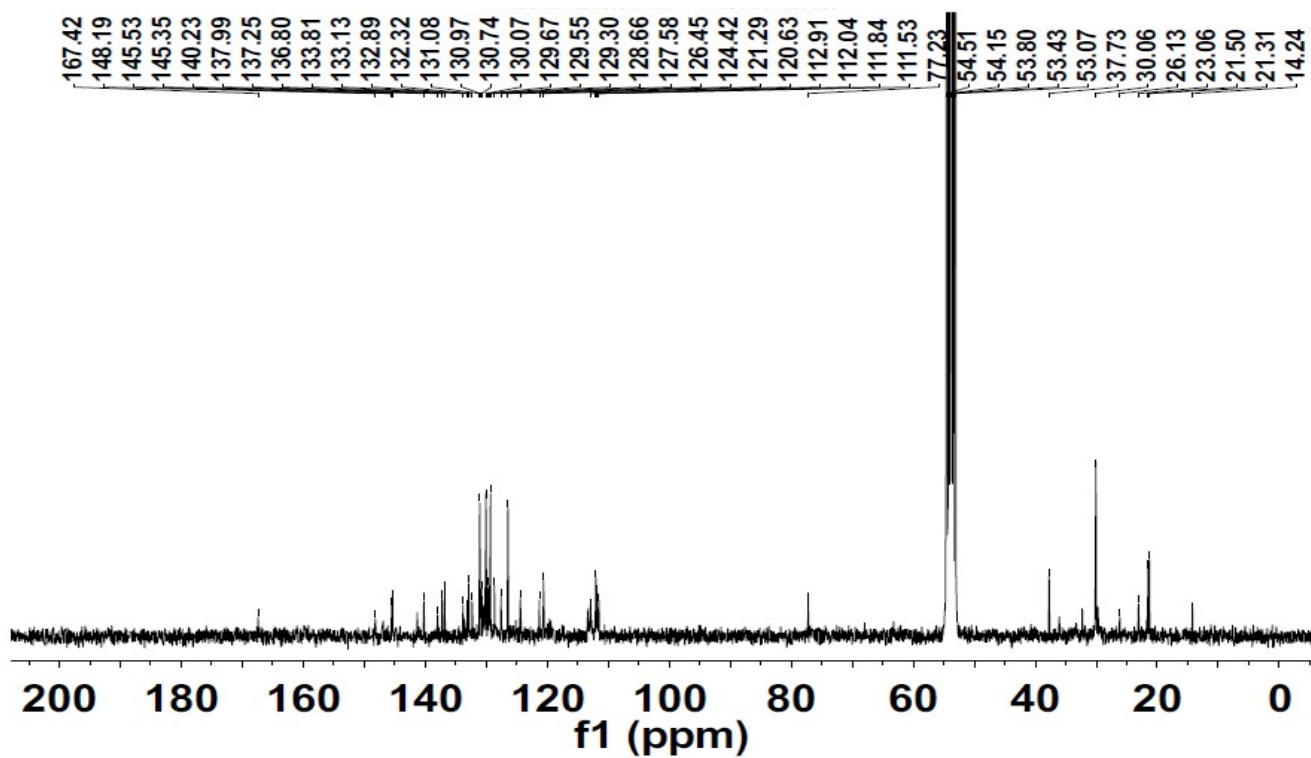

Fig. S19  $^{13}\text{C}$  NMR spectra of **9** in  $\text{CD}_2\text{Cl}_2$  at 298 K

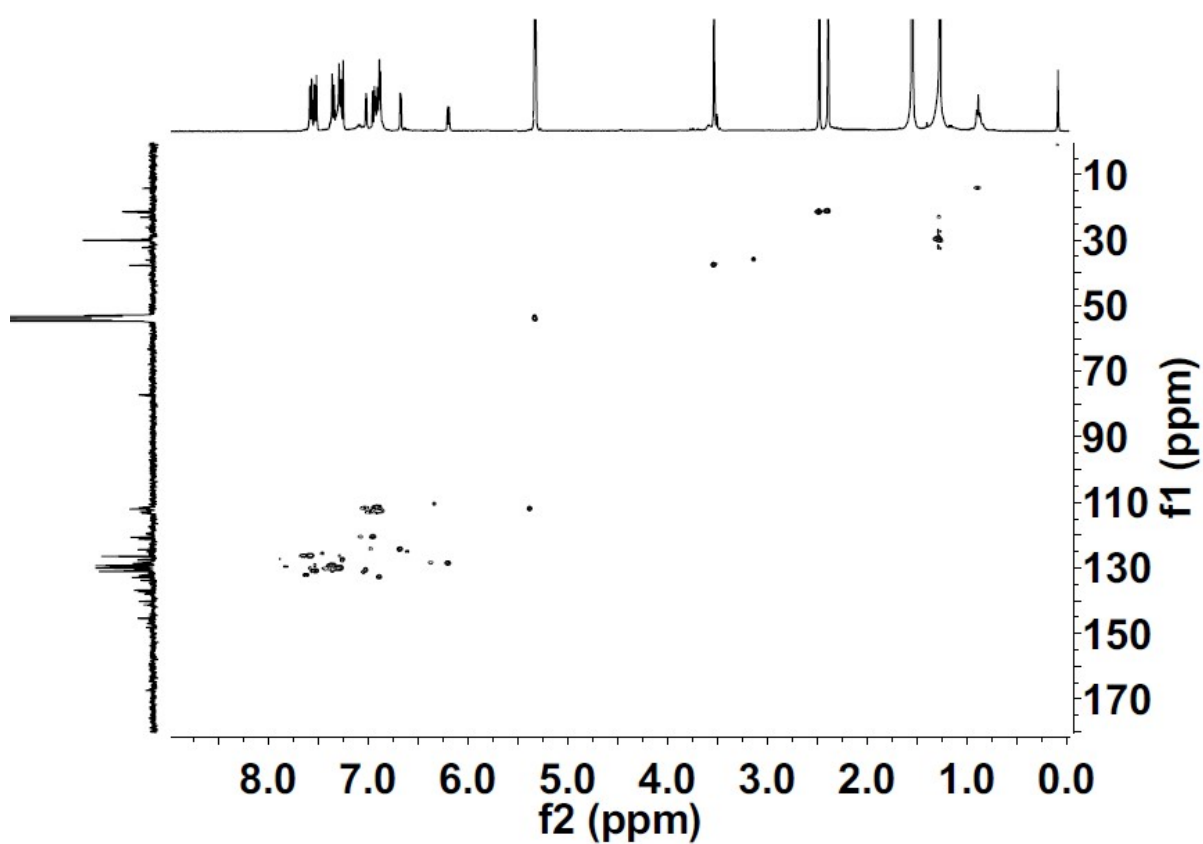

Fig. S20 HSQC NMR spectra of **9** in  $\text{CD}_2\text{Cl}_2$  at 298 K



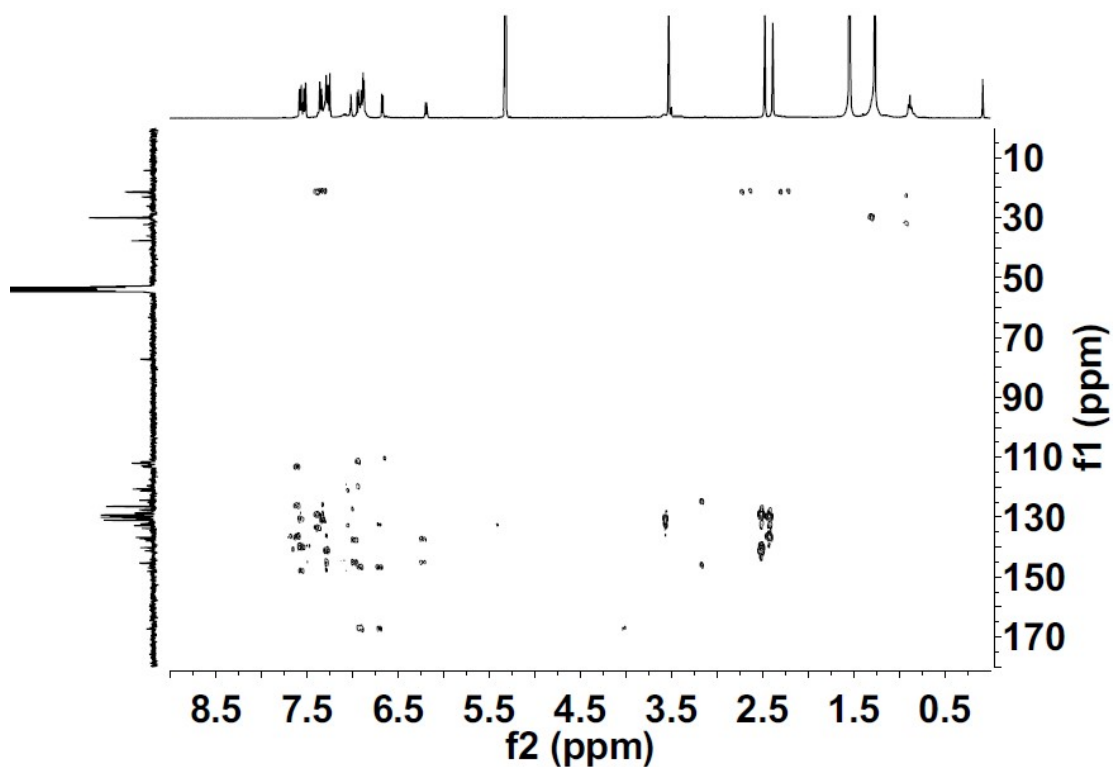

Fig. S21 HMBC NMR spectra of **9** in CD<sub>2</sub>Cl<sub>2</sub> at 298 K

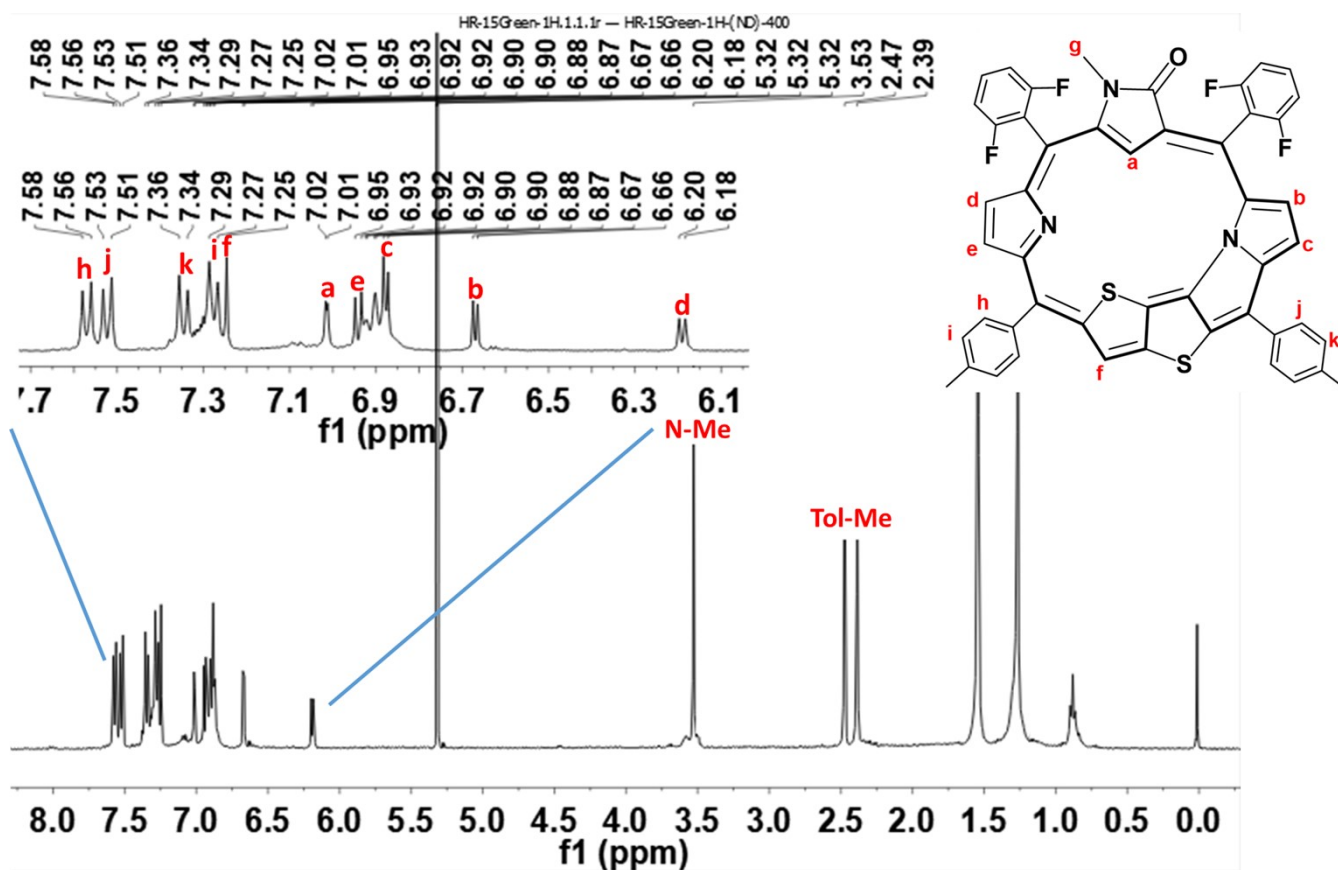

Fig. S22 Complete <sup>1</sup>H NMR spectral assignment of **9** in CD<sub>2</sub>Cl<sub>2</sub> at 298 K

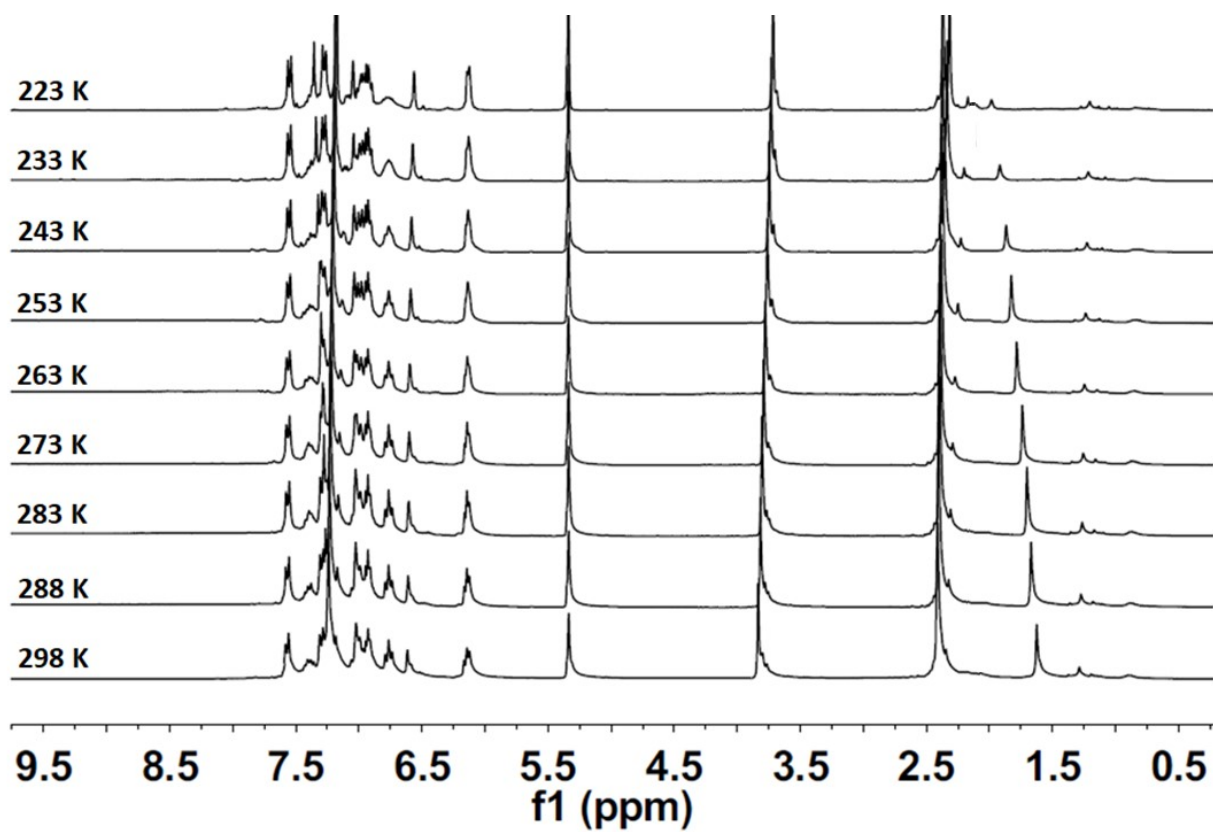

Fig. S23 Low VT  $^1\text{H}$  NMR spectra of **10** in  $\text{CD}_2\text{Cl}_2$

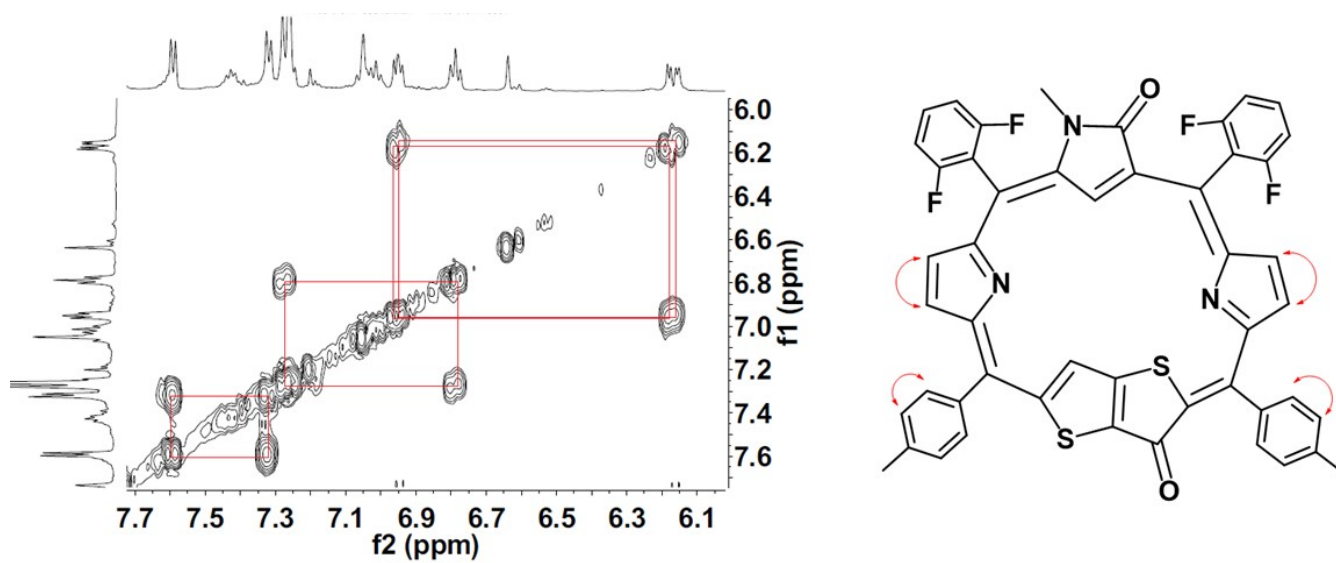

Fig. S24  $^1\text{H}$  -  $^1\text{H}$  2D COSY NMR spectra of **10** in  $\text{CD}_2\text{Cl}_2$  at 298 K

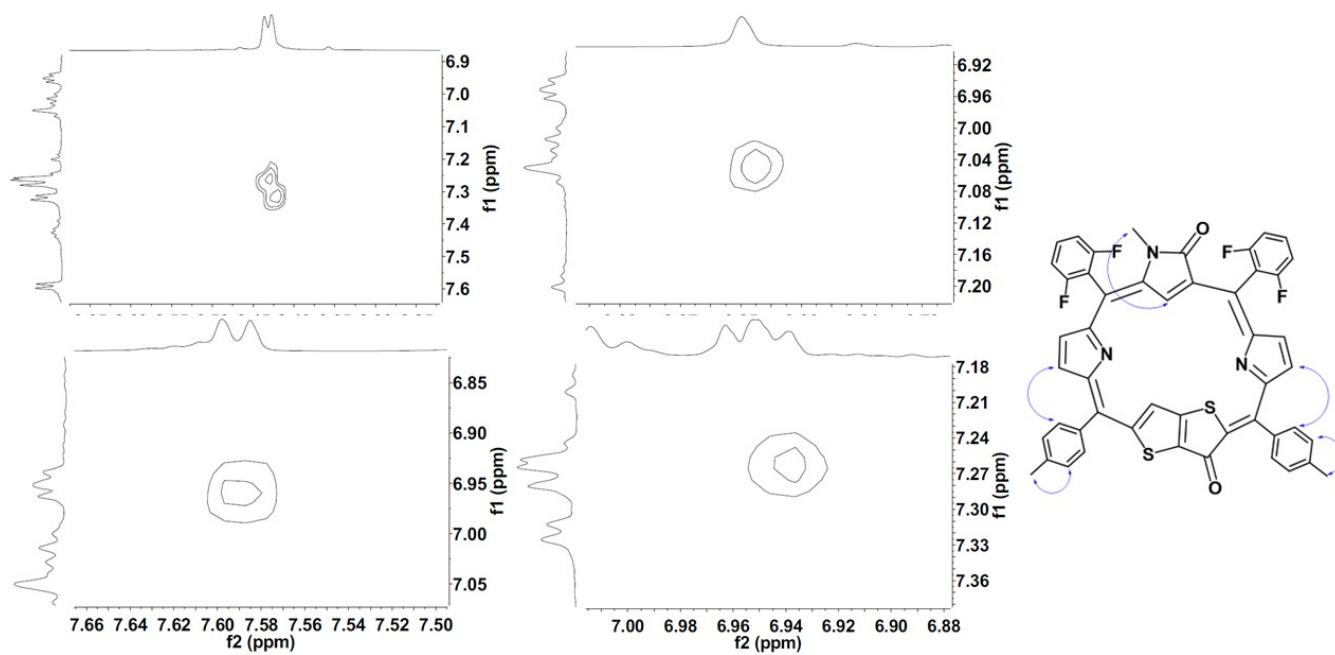

Fig. S25  $^1\text{H}$ - $^1\text{H}$  2D ROESY NMR spectra of **10** in  $\text{CD}_2\text{Cl}_2$  at 298 K

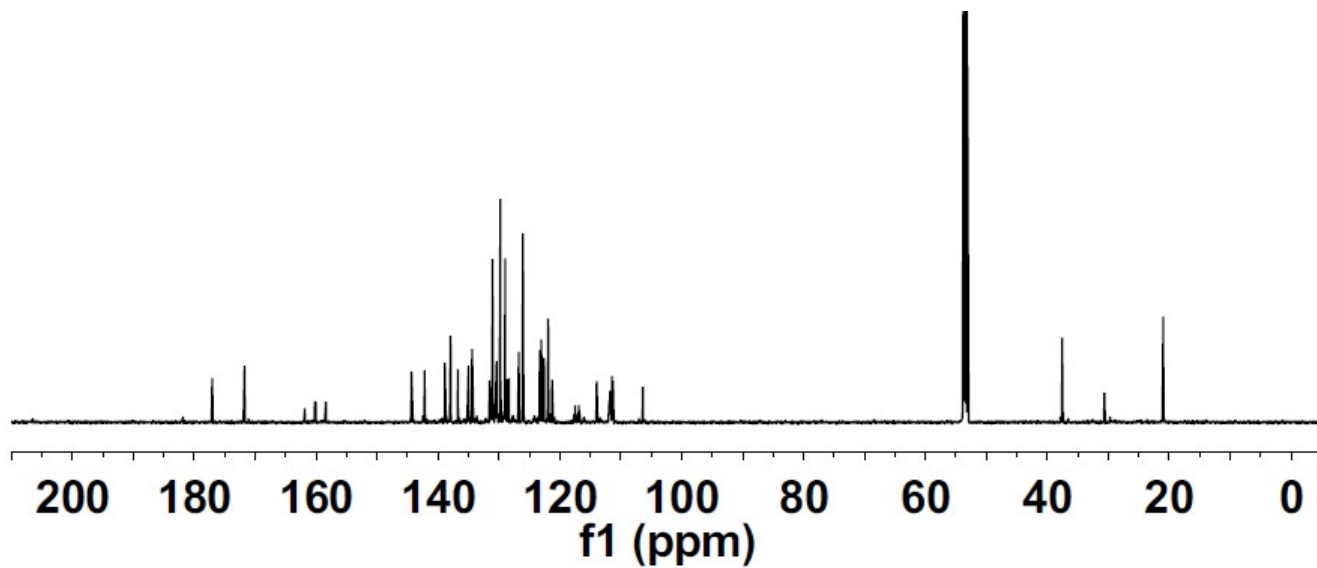

Fig. S26  $^{13}\text{C}$  NMR spectra of **10** in  $\text{CD}_2\text{Cl}_2$  at 298 K

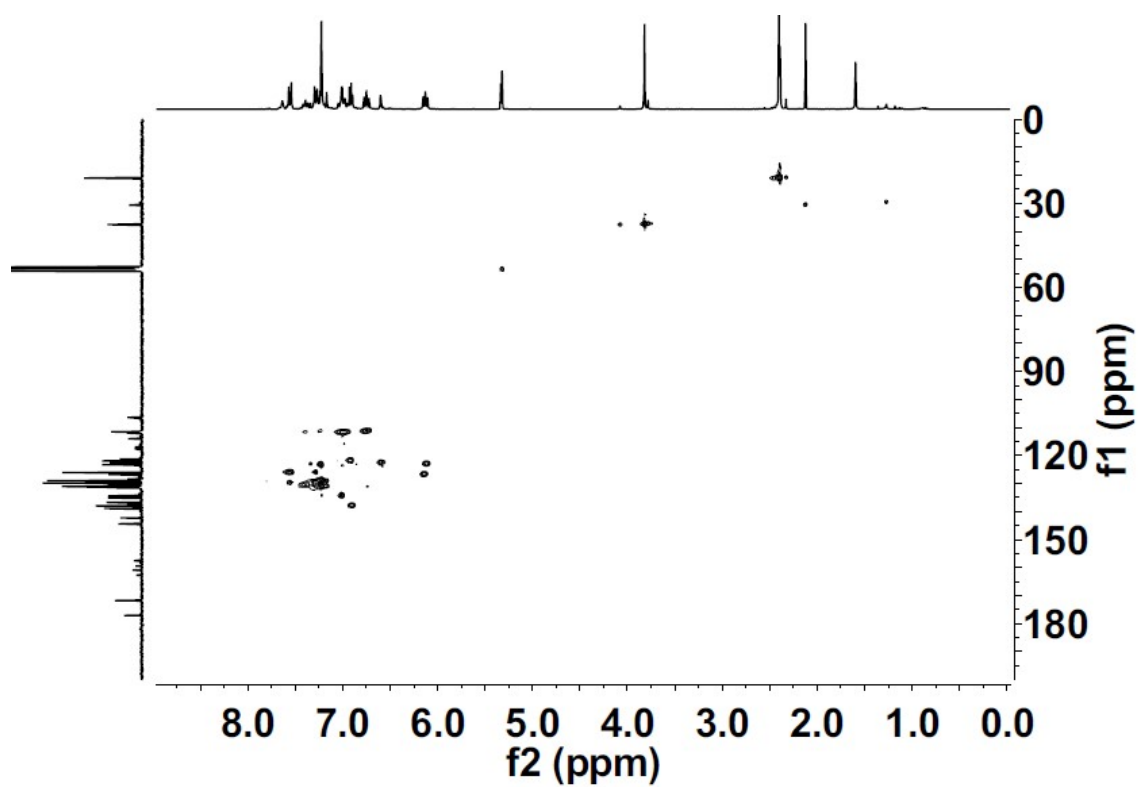

Fig. S27 HSQC NMR spectra of **10** in  $\text{CD}_2\text{Cl}_2$  at 298 K

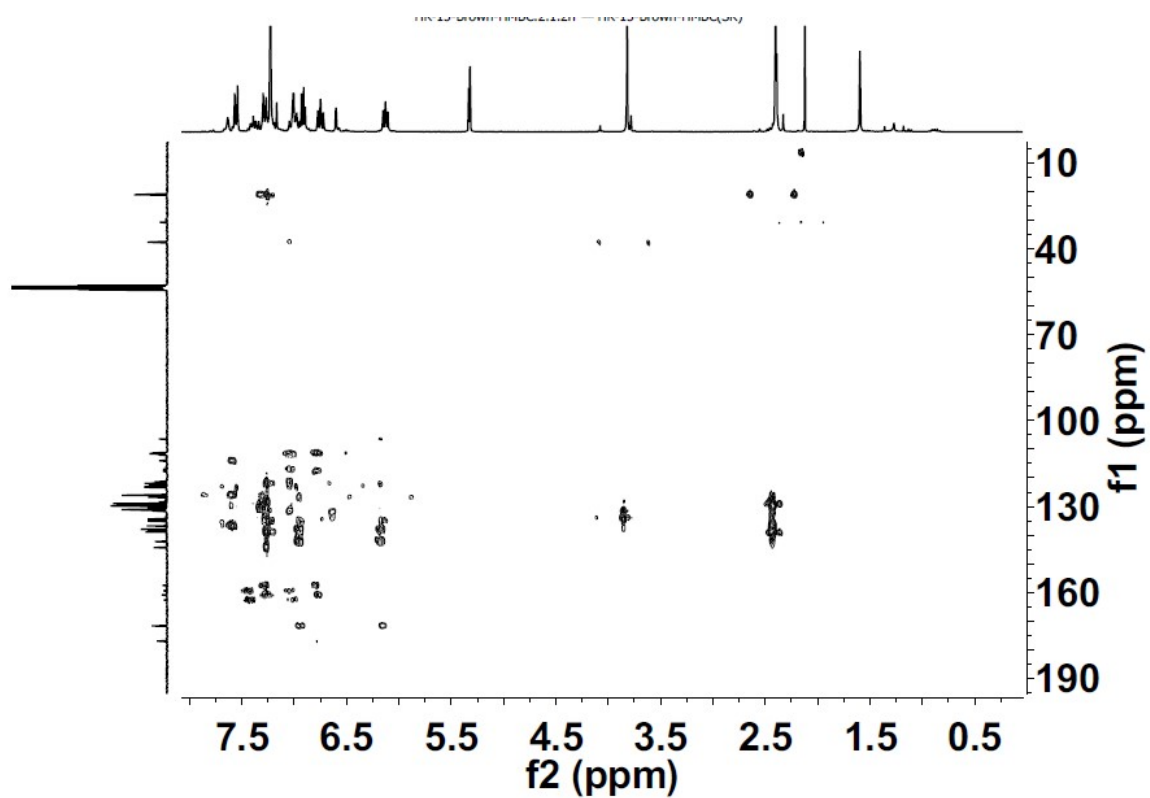

Fig. S28 HMBC NMR spectra of **10** in  $\text{CD}_2\text{Cl}_2$  at 298 K

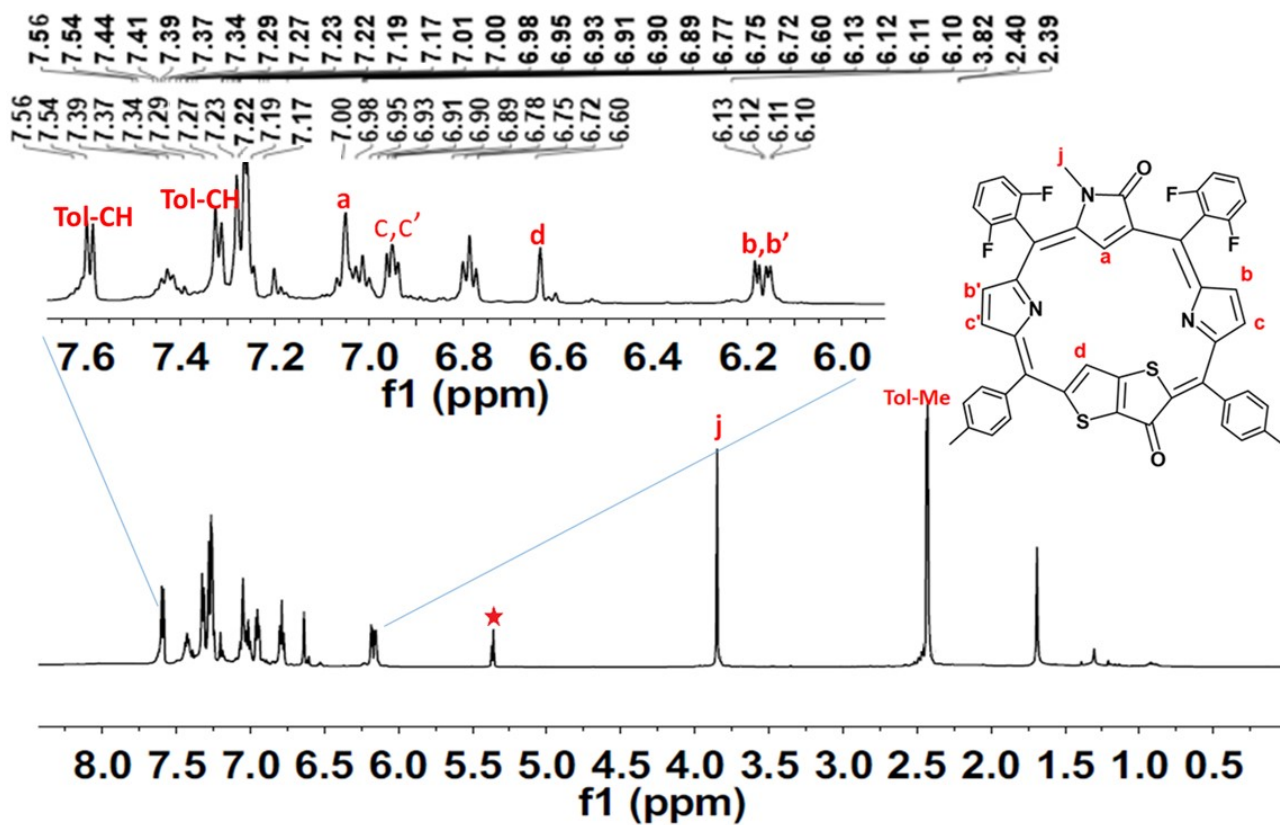

Fig. S29 Complete  $^1\text{H}$  NMR spectral assignment of **10** in  $\text{CD}_2\text{Cl}_2$  at 298 K

#### 4. Electrochemistry

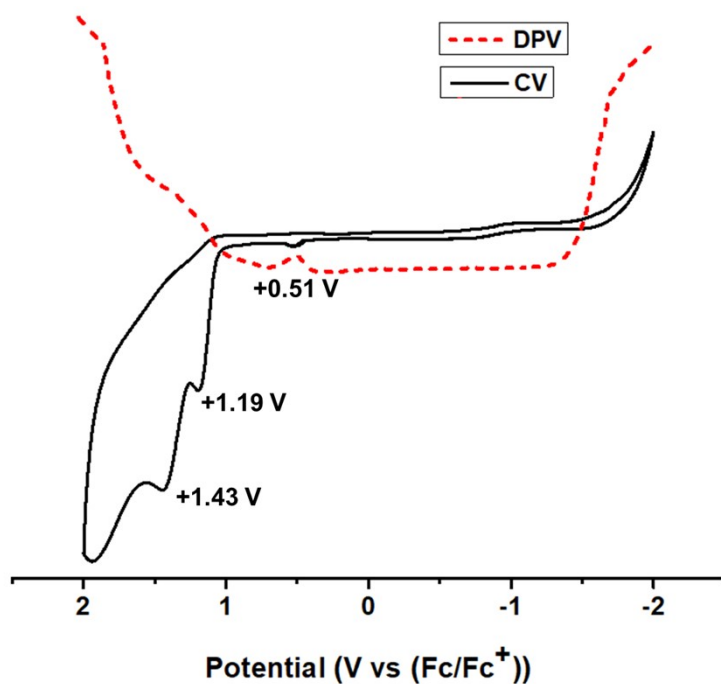

Fig. S30 Cyclic voltammogram of **7** ( $\sim 10^{-4}$  M) in dichloromethane containing tetrabutylammonium hexafluorophosphate (0.01M) recorded at  $100 \text{ mVs}^{-1}$ .

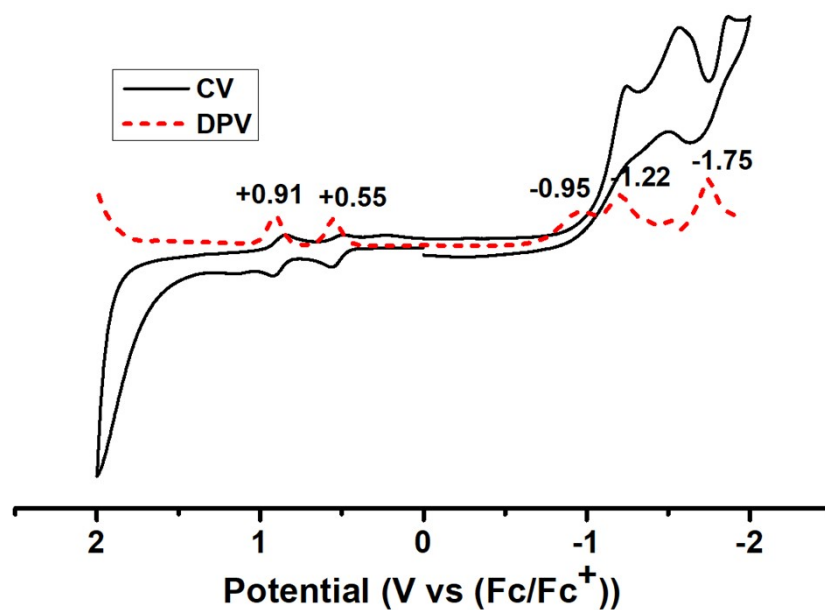

**Fig. S31** Cyclic voltammogram of **9** ( $\sim 10^{-4}$ M) in dichloromethane containing tetrabutylammonium hexafluorophosphate (0.01M) recorded at  $100 \text{ mVs}^{-1}$ .

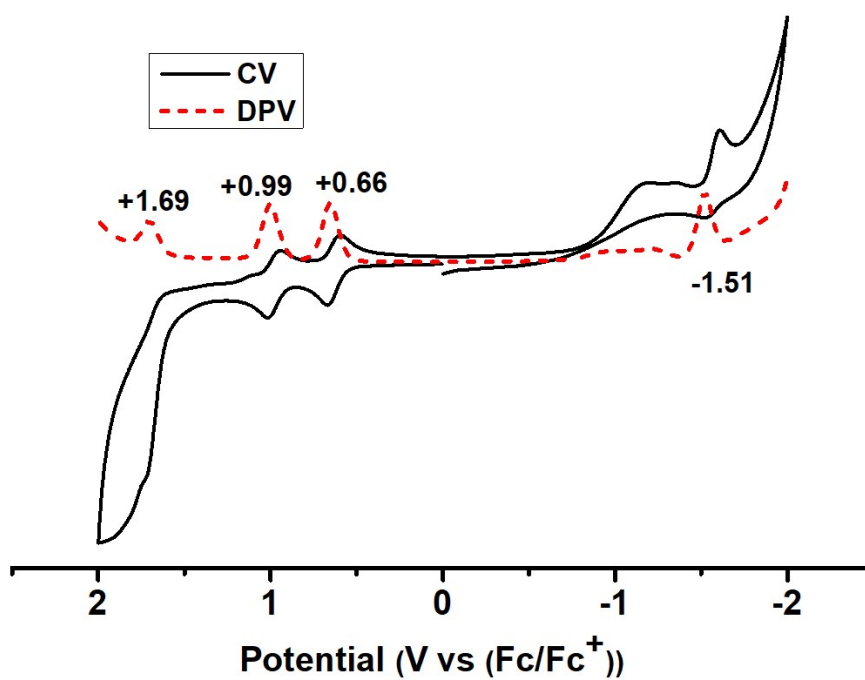

**Fig. S32** Cyclic voltammogram of **10** ( $\sim 10^{-4}$ M) in dichloromethane containing tetrabutylammonium hexafluorophosphate (0.01M) recorded at  $100 \text{ mVs}^{-1}$ .

## 4.0 Crystallographic Data

Table S1. Crystallographic data

| Parameters                          | 7                                                                            |
|-------------------------------------|------------------------------------------------------------------------------|
| Chemical formula                    | C <sub>49</sub> H <sub>37</sub> F <sub>4</sub> N <sub>3</sub> S <sub>2</sub> |
| Formula weight                      | 807.2365                                                                     |
| Temperature (K)                     | 146                                                                          |
| Crystal system                      | Monoclinic                                                                   |
| Space group                         | P 21/c                                                                       |
| a (Å); α (°)                        | 24.971(3); 90.00                                                             |
| b (Å); β (°)                        | 14.4865(19); 100.316(4)                                                      |
| c (Å); γ (°)                        | 12.363(15); 90.00                                                            |
| V (Å <sup>3</sup> ); Z              | 4399.9(9); 4                                                                 |
| ρ (calc.) g m <sup>-3</sup>         | 1.348                                                                        |
| μ(Mo Kα) mm <sup>-1</sup>           | 0.299                                                                        |
| 2θ <sub>max</sub> (°)               | 27.570                                                                       |
| R(int)                              | 0.0723                                                                       |
| Completeness to θ                   | 0.987                                                                        |
| Data / param.                       | 10045/6830                                                                   |
| GOF                                 | 1.040                                                                        |
| R1 [F > 4σ(F)]                      | 0.0723                                                                       |
| wR2 (all data)                      | 0.1895                                                                       |
| max. peak/hole (e.Å <sup>-3</sup> ) | 0.414/-0.349                                                                 |
| CCDC                                | 2352461                                                                      |

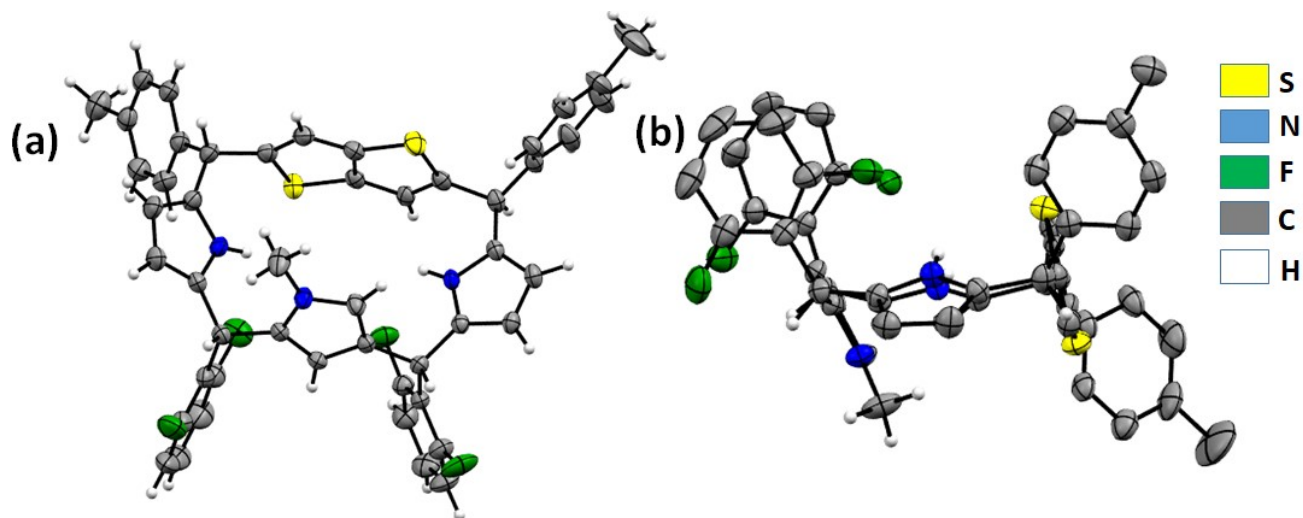

Fig. S33 Crystal structure of 7 (A: top view; B-side view)

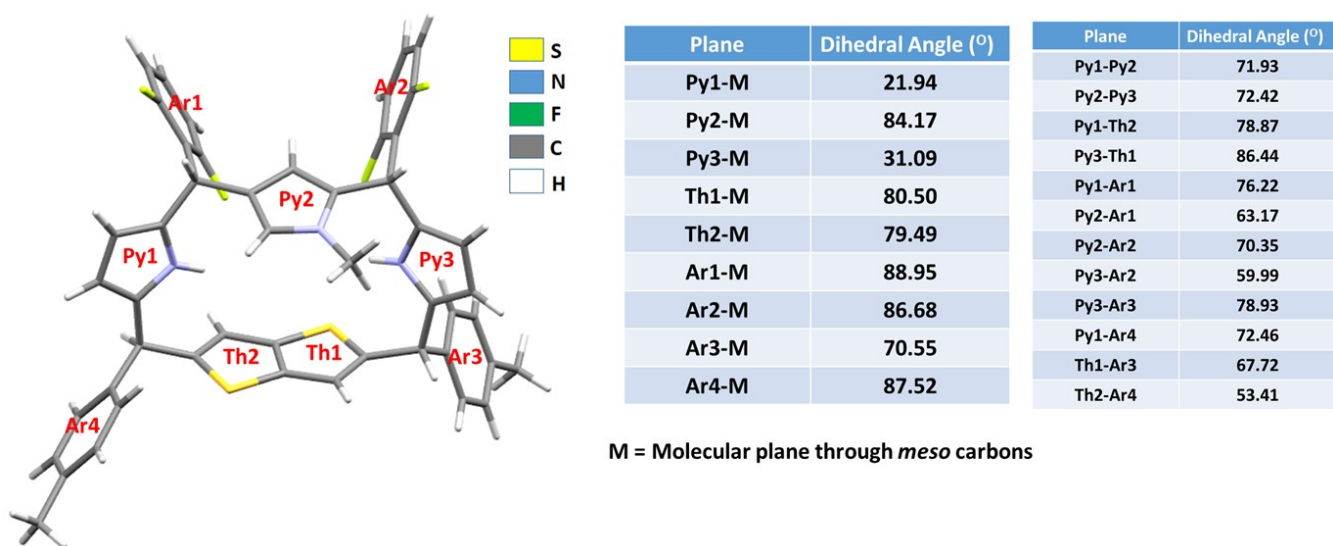

**Fig. S33A** Crystal structure of **7** (Table shows dihedral angles)



## 5.0 Theoretical Calculation

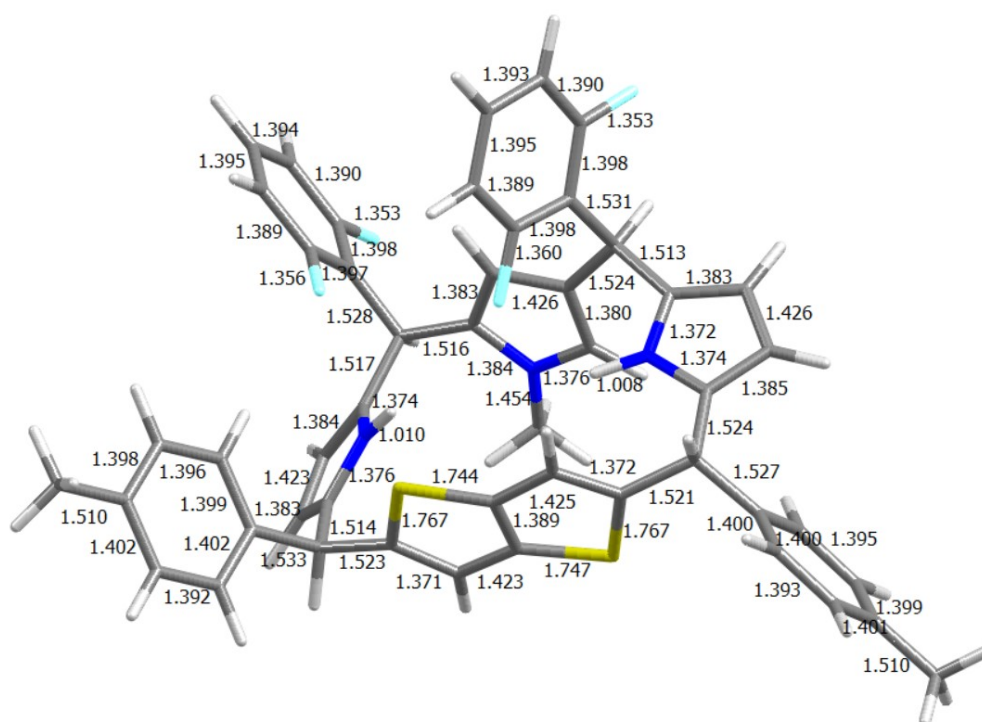

**Fig. S34** Optimized geometry of **7** with selected bond length (Å).

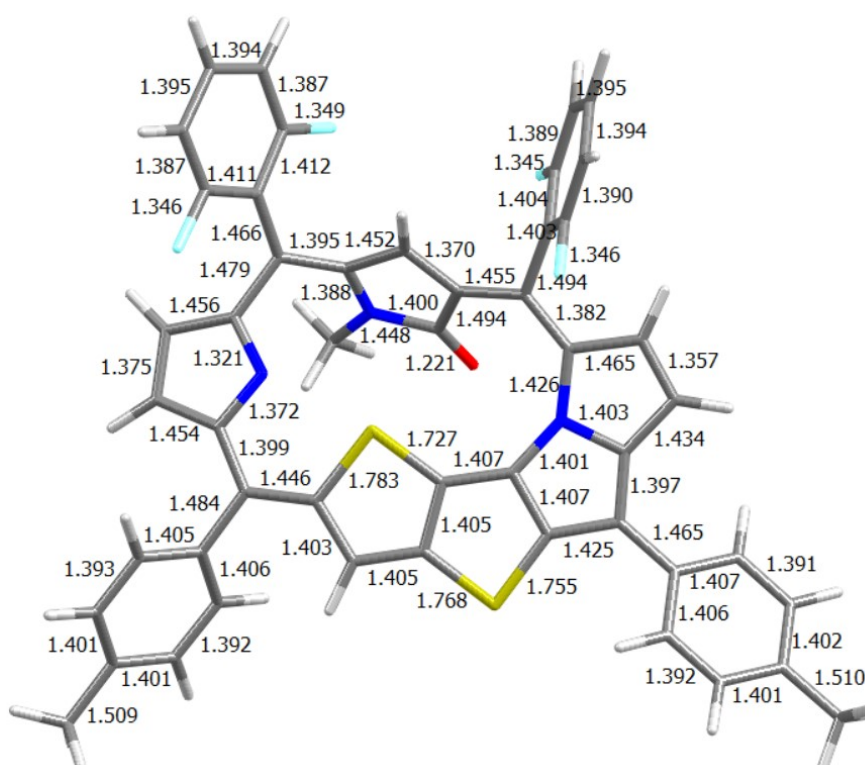

**Fig. S35** Optimized geometry of **9** with selected bond length (Å).

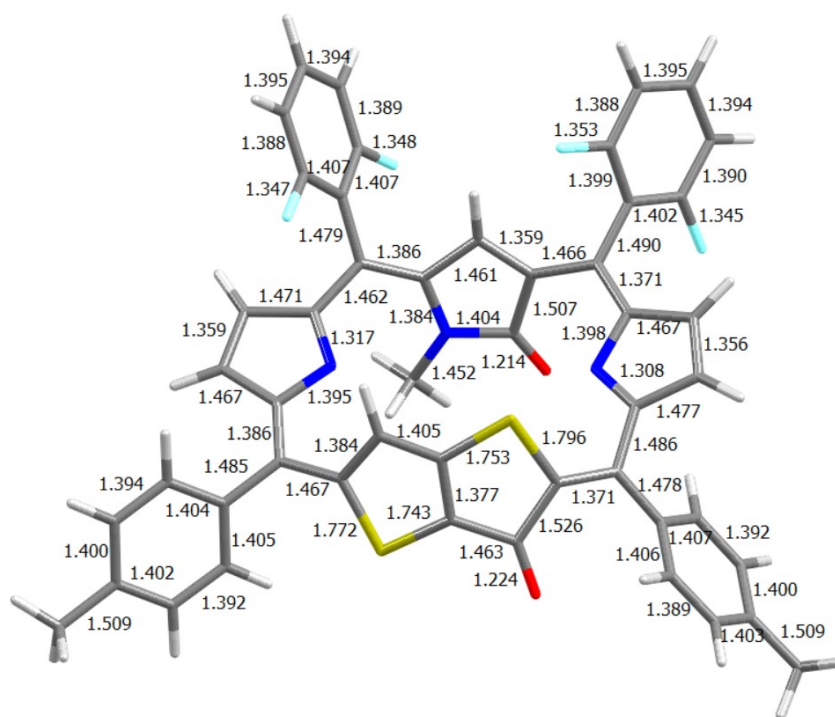

**Fig. S36** Optimized geometry of **10** with selected bond length (Å).

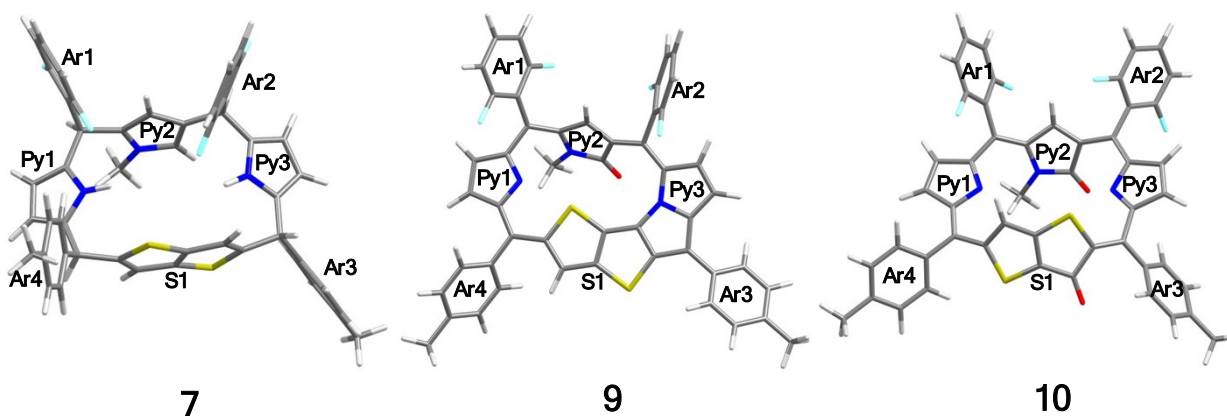

**Fig. S37** Label used to measure the important dihedral between the macrocyclic mean plane (M) and the rings of **7**, **9** and **10**.

Table S2. Important dihedral between the macrocyclic mean plane (M) and the rings of **7**, **9** and **10**.

| Plane | Dihedral Angle (°) |          |           | Plane   | Dihedral Angle (°) |          |           |
|-------|--------------------|----------|-----------|---------|--------------------|----------|-----------|
|       | <b>7</b>           | <b>9</b> | <b>10</b> |         | <b>7</b>           | <b>9</b> | <b>10</b> |
| Ar1-M | 83.69              | 49.77    | 60.18     | Py1-Py2 | 83.08              | 56.45    | 51.20     |
| Ar2-M | 88.09              | 73.53    | 54.43     | Py2-Py3 | 73.44              | 45.25    | 50.99     |
| Ar3-M | 79.31              | 33.39    | 53.42     | Py1-Th2 | 78.36              | 22.77    | 45.45     |
| Ar4-M | 70.55              | 48.10    | 47.72     | Py1-Th1 | 82.39              | 19.88    | 45.00     |
| Py1-M | 32.90              | 17.39    | 4.96      | Py1-Ar1 | 73.15              | 66.55    | 65.01     |
| Py2-M | 71.09              | 52.57    | 49.81     | Py2-Ar1 | 66.28              | 73.42    | 70.62     |
| Py3-M | 24.61              | 7.42     | 11.85     | Py2-Ar2 | 66.44              | 77.3     | 44.08     |
| S1-M  | 86.73              | 4.27     | 43.87     | Py3-Ar2 | 66.08              | 74.40    | 64.61     |
| Th1-M | 86.19              | 3.52     | 45.11     | Py3-Ar3 | 59.84              | 39.35    | 64.60     |
| Th2-M | 87.31              | 5.39     | 43.68     | Py1-Ar4 | 77.06              | 64.52    | 57.57     |
| -     | -                  | -        | -         | Th1-Ar3 | 57.98              | 34.99    | 85.98     |

|   |   |   |   |         |       |       |       |
|---|---|---|---|---------|-------|-------|-------|
| - | - | - | - | Th2-Ar4 | 74.09 | 42.06 | 73.72 |
|---|---|---|---|---------|-------|-------|-------|

Table S3. Important dihedral between the macrocyclic mean plane (M) and the rings of stereoisomer of **7**.

| Plane           | Dihedral Angle (°) between the macrocyclic mean plane |       |       |       |       |       |       |       |
|-----------------|-------------------------------------------------------|-------|-------|-------|-------|-------|-------|-------|
|                 | Ar1-M                                                 | Ar2-M | Ar3-M | Ar4-M | Py1-M | Py2-M | Py3-M | S1-M  |
| <b>7</b>        | 83.69                                                 | 88.09 | 79.31 | 70.55 | 32.90 | 71.09 | 24.61 | 86.73 |
| Stereoisomer-1  | 89.51                                                 | 81.26 | 75.54 | 80.97 | 23.49 | 71.44 | 12.68 | 84.48 |
| Stereoisomer-2  | 67.90                                                 | 87.29 | 80.21 | 75.27 | 11.62 | 62.90 | 25.23 | 85.21 |
| Stereoisomer-3  | 72.11                                                 | 80.57 | 74.63 | 59.58 | 30.67 | 62.50 | 10.85 | 84.11 |
| Stereoisomer-4  | 49.56                                                 | 86.17 | 67.23 | 61.80 | 31.06 | 65.21 | 24.32 | 89.68 |
| Stereoisomer-5  | 85.83                                                 | 88.34 | 79.67 | 82.48 | 25.68 | 69.52 | 24.88 | 86.22 |
| Stereoisomer-6  | 72.40                                                 | 84.47 | 67.97 | 59.67 | 29.52 | 62.91 | 22.39 | 85.71 |
| Stereoisomer-7  | 86.37                                                 | 81.67 | 75.22 | 70.12 | 73.11 | 73.92 | 12.51 | 85.95 |
| Stereoisomer-8  | 52.17                                                 | 87.42 | 62.86 | 61.53 | 29.80 | 61.74 | 34.04 | 89.65 |
| Stereoisomer-9  | 70.14                                                 | 87.80 | 63.98 | 60.72 | 32.39 | 59.18 | 33.85 | 84.52 |
| Stereoisomer-10 | 86.60                                                 | 86.19 | 64.41 | 70.41 | 30.24 | 74.56 | 24.67 | 88.04 |
| Stereoisomer-11 | 86.29                                                 | 88.50 | 61.91 | 82.16 | 24.93 | 69.32 | 33.43 | 89.82 |
| Stereoisomer-12 | 50.02                                                 | 82.17 | 74.66 | 61.67 | 31.20 | 65.14 | 12.92 | 88.73 |
| Stereoisomer-13 | 83.96                                                 | 88.11 | 60.79 | 70.94 | 32.03 | 70.41 | 32.19 | 89.78 |
| Stereoisomer-14 | 88.95                                                 | 84.62 | 67.58 | 80.49 | 22.59 | 72.20 | 23.75 | 86.24 |

Table S4. Calculated energies of the optimized structures and relative energies ( $\Delta E$ ) for plausible isomers of **7**.

|                 | Energy (hartree) | $\Delta E$ (kJ/mol) |
|-----------------|------------------|---------------------|
| <b>7</b>        | -3249.516115     | 0.00                |
| Stereoisomer-1  | -3249.512879     | 8.50                |
| Stereoisomer-2  | -3249.510230     | 15.45               |
| Stereoisomer-3  | -3249.510479     | 14.80               |
| Stereoisomer-4  | -3249.511195     | 12.92               |
| Stereoisomer-5  | -3249.513499     | 6.87                |
| Stereoisomer-6  | -3249.510837     | 13.86               |
| Stereoisomer-7  | -3249.514654     | 3.84                |
| Stereoisomer-8  | -3249.513113     | 7.88                |
| Stereoisomer-9  | -3249.512328     | 9.94                |
| Stereoisomer-10 | -3249.514880     | 3.24                |
| Stereoisomer-11 | -3249.514403     | 4.50                |
| Stereoisomer-12 | -3249.510754     | 14.08               |
| Stereoisomer-13 | -3249.516818     | -1.84               |
| Stereoisomer-14 | -3249.513291     | 7.41                |

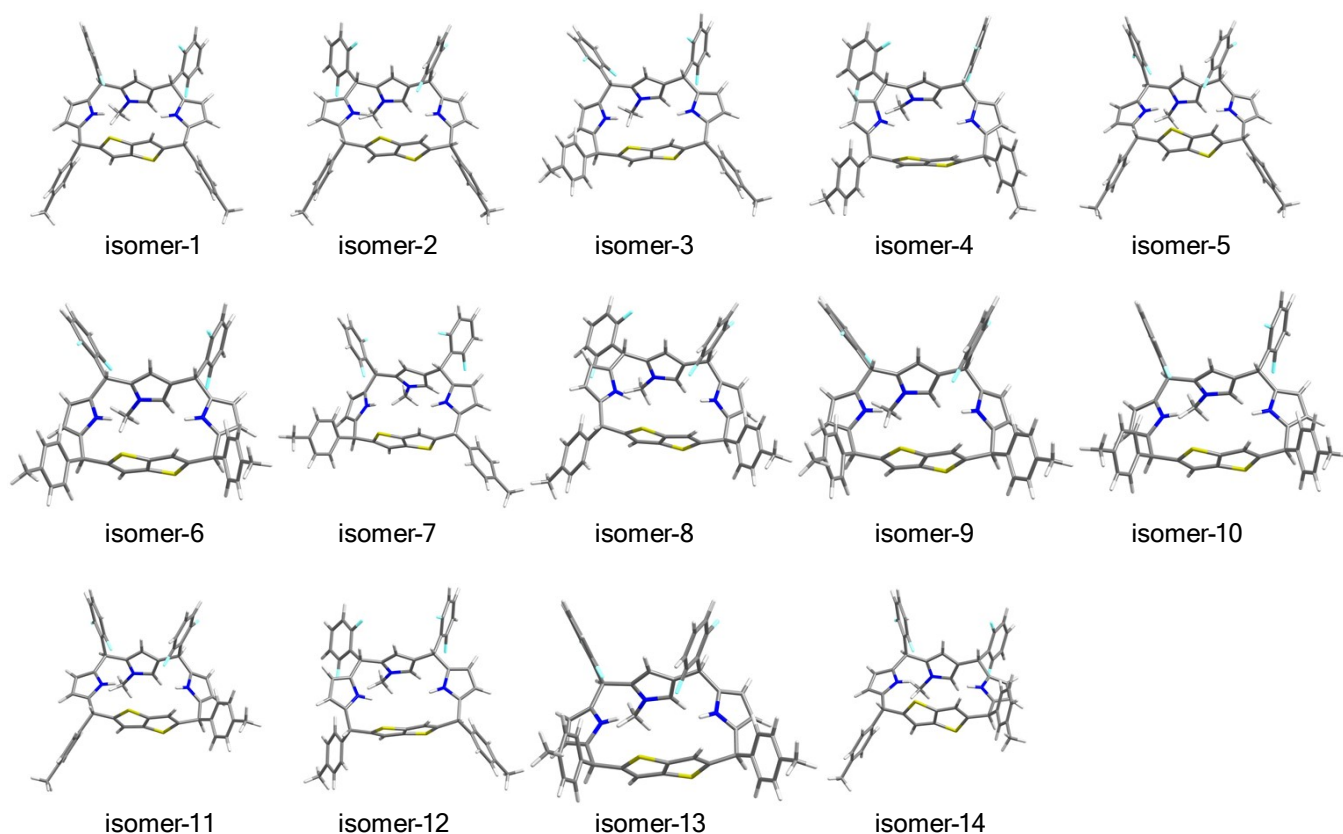

**Fig. S38** Optimized geometry of all the possible stereoisomers of **7**.

Table S5. Frontier Molecular Orbital compositions (%) in the ground state for **7**.

|        | Energy (eV) | Ar1   | Ar2   | Ar3  | Ar4  | Py1   | Py2   | Py3    | S1    |
|--------|-------------|-------|-------|------|------|-------|-------|--------|-------|
| HOMO-3 | -5.678      | 2.56  | 0.36  | 3.13 | 4.37 | 25.15 | 5.94  | 3.91   | 54.57 |
| HOMO-2 | -5.464      | 3.27  | 2.50  | 2.03 | 1.72 | 11.19 | 52.05 | 7.56   | 19.67 |
| HOMO-1 | -5.176      | 5.04  | 2.11  | 3.40 | 5.47 | 36.14 | 7.97  | 25.97  | 13.90 |
| HOMO   | -5.050      | 2.40  | 6.32  | 6.19 | 1.68 | 13.03 | 20.80 | a44.39 | 5.20  |
| LUMO   | -0.743      | 0.21  | 0.09  | 4.13 | 3.69 | 5.37  | 0.24  | 4.62   | 81.65 |
| LUMO+1 | -0.427      | 82.76 | 0.18  | 0.01 | 1.16 | 5.36  | 9.62  | 0.06   | 0.85  |
| LUMO+2 | -0.325      | 0.27  | 84.91 | 0.83 | 0.02 | 0.03  | 6.37  | 7.08   | 0.48  |
| LUMO+3 | -0.090      | 75.39 | 1.18  | 2.54 | 9.11 | 3.62  | 2.18  | 0.17   | 5.81  |
| LUMO+4 | -5.678      | 2.56  | 0.36  | 3.13 | 4.37 | 25.15 | 5.94  | 3.91   | 54.57 |

Table S6. Frontier Molecular Orbital compositions (%) in the ground state for **9**.

|        | Energy (eV) | Ar1  | Ar2  | Ar3  | Ar4  | Py1   | Py2  | Py3  | S1    |
|--------|-------------|------|------|------|------|-------|------|------|-------|
| HOMO-3 | -5.815      | 5.72 | 1.03 | 3.59 | 1.95 | 25.19 | 5.35 | 5.07 | 52.10 |

|        |        |       |       |       |       |       |       |       |       |
|--------|--------|-------|-------|-------|-------|-------|-------|-------|-------|
| HOMO-2 | -5.469 | 0.83  | 9.97  | 15.77 | 1.57  | 6.38  | 12.76 | 13.32 | 39.41 |
| HOMO-1 | -5.304 | 23.18 | 1.30  | 2.43  | 6.09  | 5.21  | 27.49 | 12.29 | 22.00 |
| HOMO   | -4.511 | 11.58 | 7.88  | 12.27 | 1.99  | 13.60 | 12.39 | 14.80 | 25.47 |
| LUMO   | -2.962 | 10.92 | 6.92  | 3.19  | 12.99 | 12.61 | 21.61 | 14.17 | 17.60 |
| LUMO+1 | -1.951 | 17.65 | 3.15  | 5.94  | 16.22 | 19.85 | 13.05 | 7.55  | 16.59 |
| LUMO+2 | -1.543 | 14.85 | 26.69 | 7.58  | 0.89  | 3.67  | 24.62 | 15.31 | 6.39  |
| LUMO+3 | -0.432 | 4.39  | 65.23 | 5.97  | 2.39  | 0.50  | 6.36  | 13.04 | 2.13  |
| LUMO+4 | -5.815 | 5.72  | 1.03  | 3.59  | 1.95  | 25.19 | 5.35  | 5.07  | 52.10 |

Table S7. Frontier Molecular Orbital compositions (%) in the ground state for **10**.

|        | Energy (eV) | Ar1   | Ar2   | Ar3   | Ar4   | Py1   | Py2   | Py3   | S1    |
|--------|-------------|-------|-------|-------|-------|-------|-------|-------|-------|
| HOMO-3 | -6.241      | 0.52  | 7.64  | 18.82 | 0.26  | 1.45  | 10.63 | 15.30 | 45.40 |
| HOMO-2 | -5.954      | 6.27  | 1.25  | 20.77 | 2.83  | 8.21  | 4.12  | 4.41  | 52.13 |
| HOMO-1 | -5.336      | 22.60 | 0.73  | 4.43  | 9.55  | 14.42 | 32.25 | 3.11  | 12.90 |
| HOMO   | -5.148      | 1.92  | 1.98  | 10.53 | 1.03  | 1.30  | 2.40  | 6.93  | 73.91 |
| LUMO   | -2.848      | 9.34  | 13.27 | 2.56  | 11.07 | 10.14 | 25.11 | 19.85 | 8.67  |
| LUMO+1 | -2.631      | 3.44  | 12.23 | 9.54  | 11.59 | 17.18 | 7.44  | 10.58 | 28.01 |
| LUMO+2 | -1.604      | 24.27 | 2.09  | 9.41  | 10.10 | 16.40 | 18.76 | 3.85  | 15.13 |
| LUMO+3 | -1.537      | 6.98  | 13.01 | 16.28 | 2.31  | 3.62  | 13.04 | 14.98 | 29.77 |
| LUMO+4 | -6.241      | 0.52  | 7.64  | 18.82 | 0.26  | 1.45  | 10.63 | 15.30 | 45.40 |

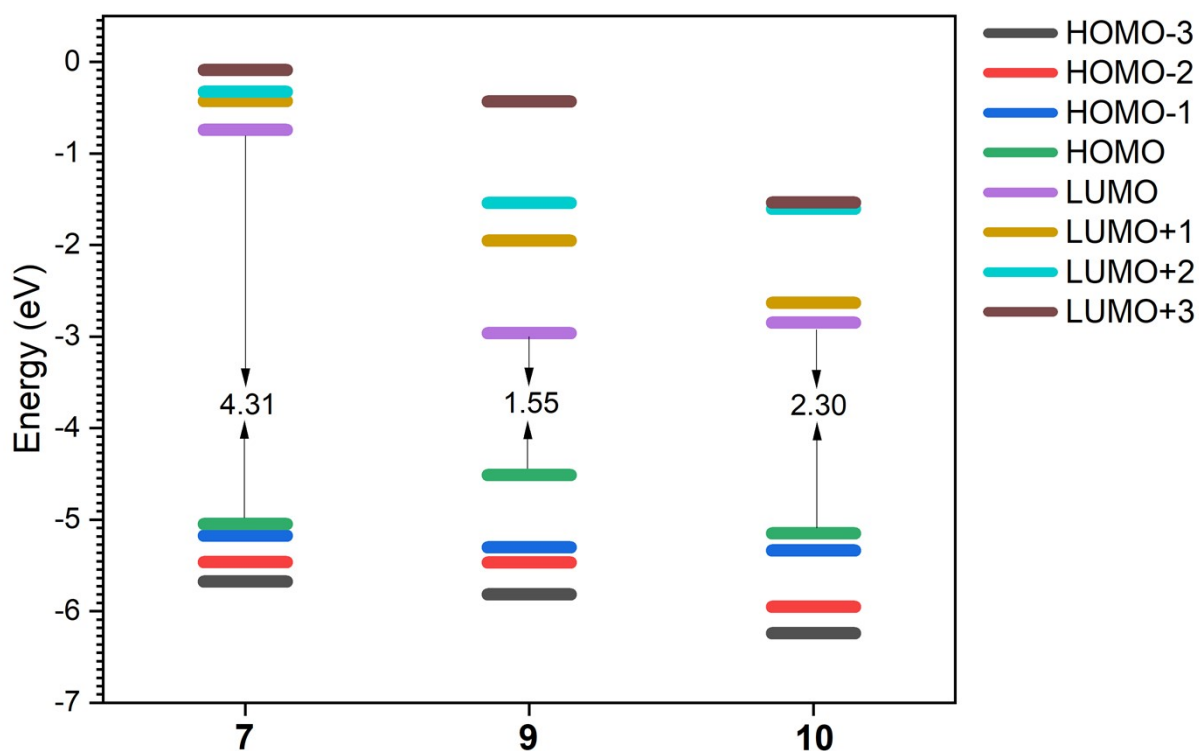

Fig. S39 FMO energy levels of **7**, **9** and **10**



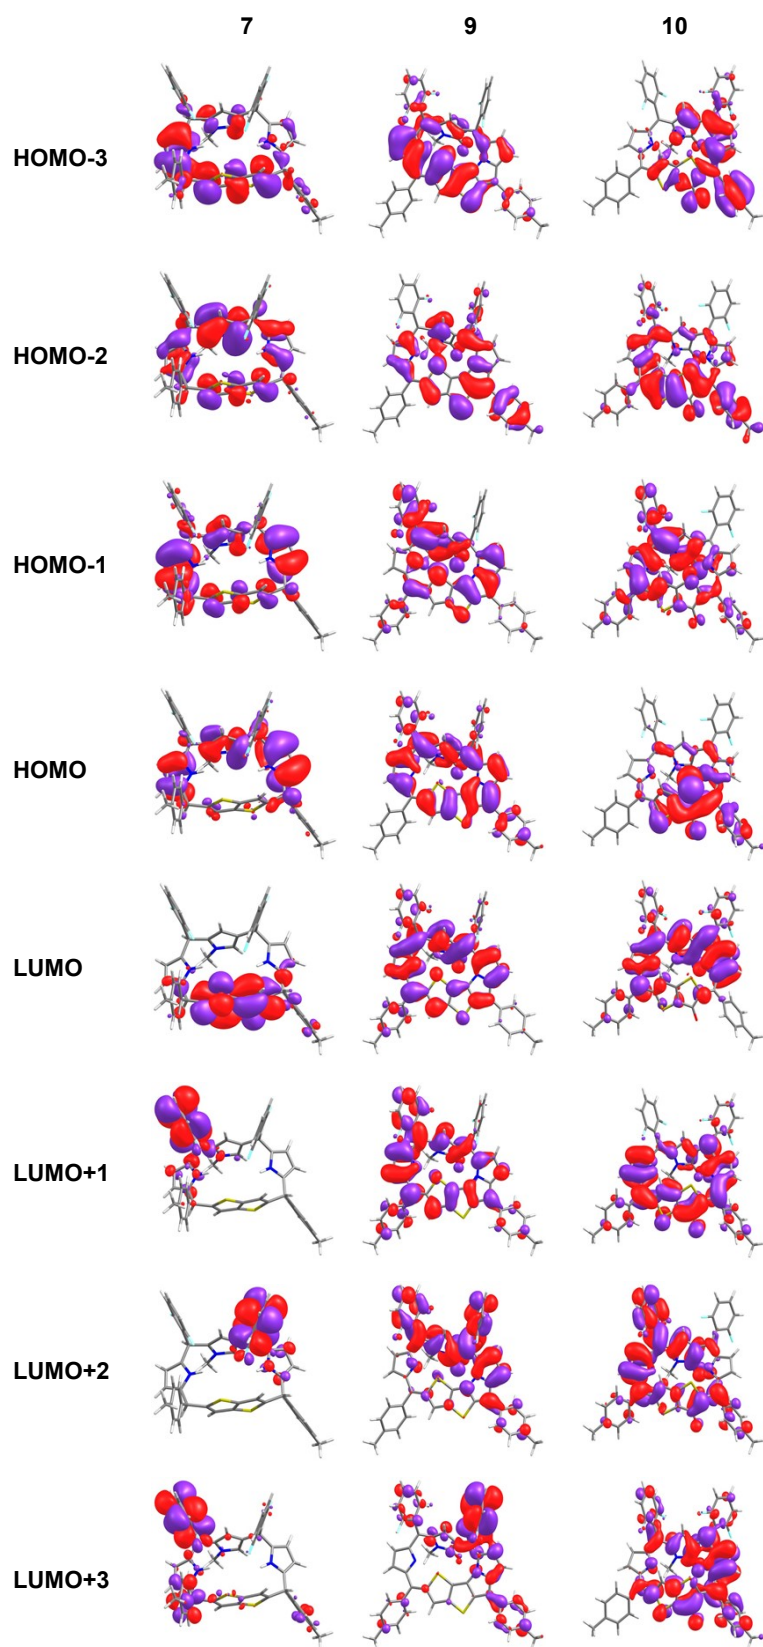

**Fig. S40** Highest occupied molecular orbital and lowest unoccupied molecular orbitals of **7**, **9** and **10**

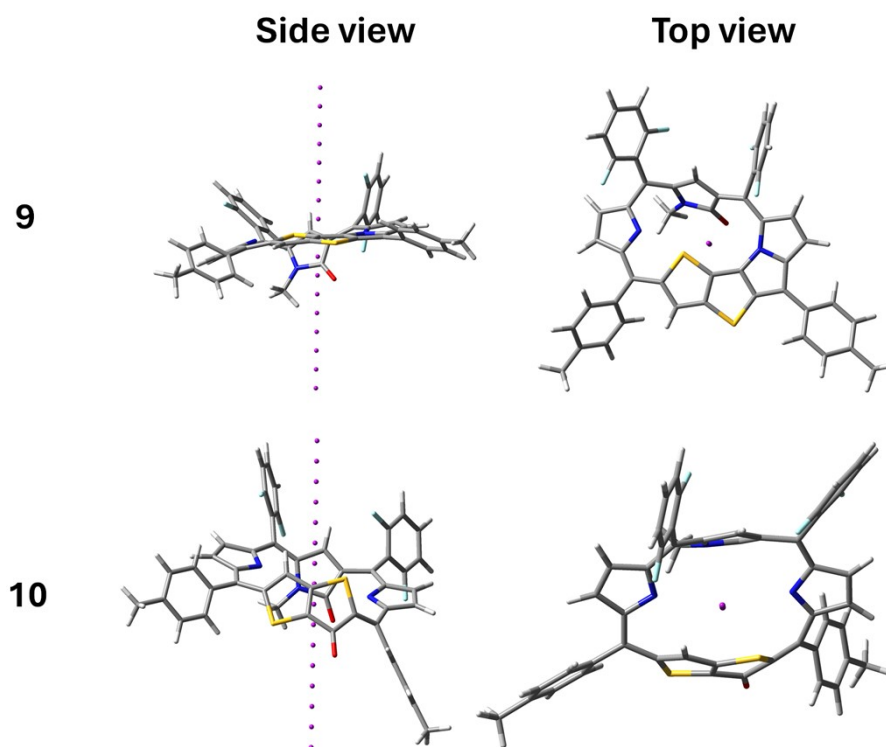

**Fig. S41** The centers of macrocycles **9** and **10** for the NICS values were designated at the non-weighted mass of  $\pi$  conjugation pathway of the macrocycles.

Table S8. The calculated nucleus-independent chemical shifts (NICS) values for **9** and **10**.

| Distance (Å) | Macrocycle |           |
|--------------|------------|-----------|
|              | <b>9</b>   | <b>10</b> |
| -8           | 0.5807     | -0.2305   |
| -7           | 0.8406     | -0.3497   |
| -6           | 1.2701     | -0.4865   |
| -5           | 2.0078     | -0.6098   |
| -4           | 3.1912     | -0.7139   |
| -3           | 3.7092     | -0.9822   |
| -2           | 2.7057     | -1.5375   |
| -1           | 8.4334     | -1.7308   |
| 0            | 8.4270     | -1.4915   |
| 1            | 9.0511     | -1.2194   |
| 2            | 6.9556     | -0.8664   |
| 3            | 4.2039     | -0.5359   |
| 4            | 2.5202     | -0.3736   |
| 5            | 1.5778     | -0.2913   |
| 6            | 1.0341     | -0.2023   |
| 7            | 0.7054     | -0.1111   |
| 8            | 0.4979     | -0.0431   |



Table S9. Harmonic oscillator model of aromaticity (HOMA), multi-center indices (MCI), approximate multi-center bond order for large rings (AV1245 index) and Avmin index values for **9** and **10**.

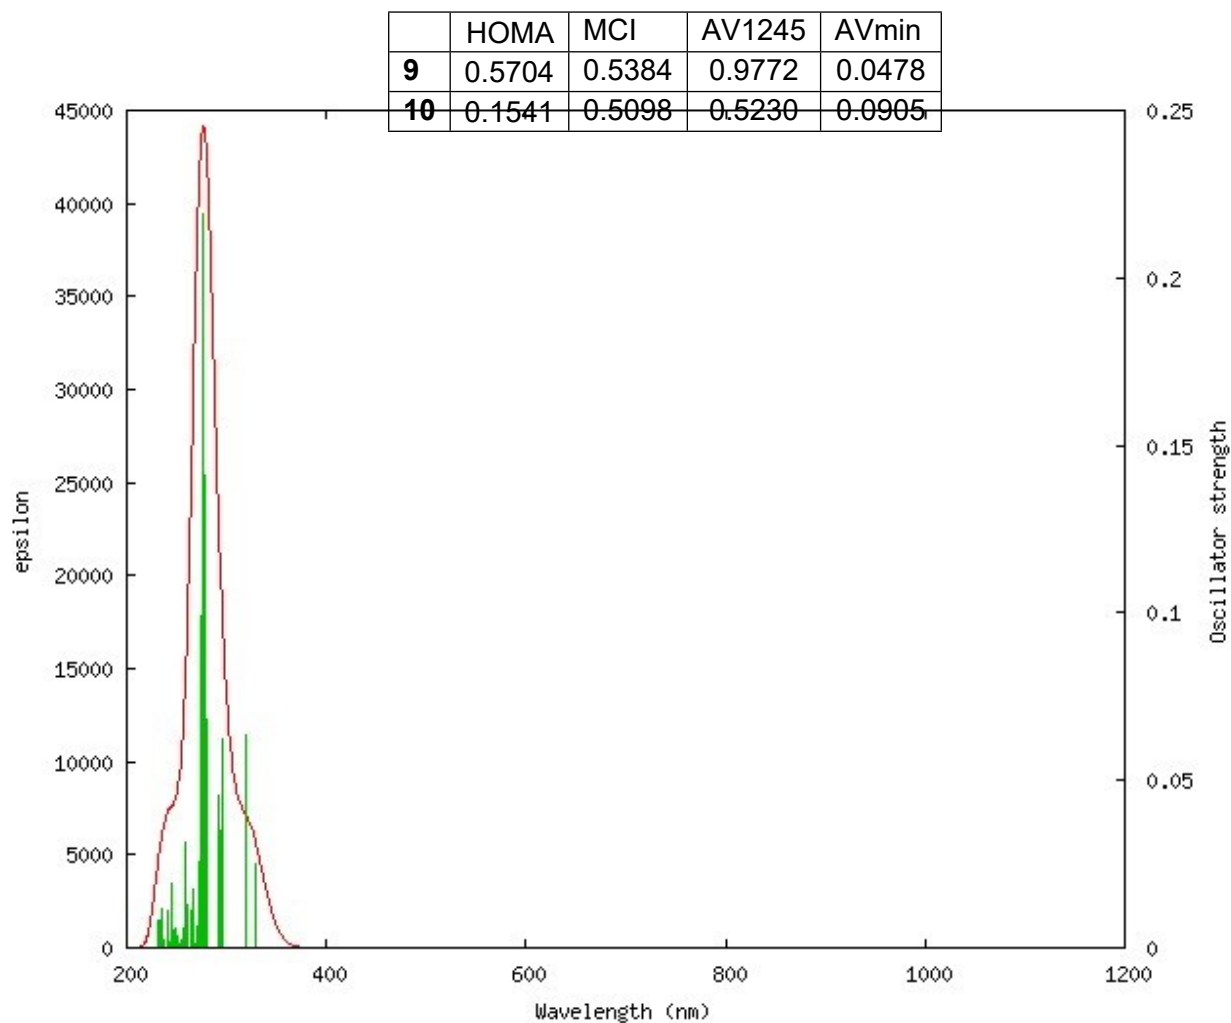

**Fig. S42** Computed absorption spectrum of **7** in solvent phase ( $\text{CH}_2\text{Cl}_2$ )

Table S10. Computed absorption maxima ( $\lambda_{\text{max}}$  nm), Electronic excitation energies (E, eV), and Oscillator strength ( $f$ ) of **7** in solvent phase ( $\text{CH}_2\text{Cl}_2$ ).

| No. | E (cm <sup>-1</sup> ) | Cal. $\lambda_{\max}$ (nm) | Oscillator Strength $f$ | Main Contributing Configurations                                                                        |
|-----|-----------------------|----------------------------|-------------------------|---------------------------------------------------------------------------------------------------------|
| 1   | 30353.27              | 329.45                     | 0.0250                  | HOMO→LUMO (94%)                                                                                         |
| 2   | 31251.78              | 319.98                     | 0.0637                  | HOMO-1→LUMO (93%)                                                                                       |
| 3   | 33810.19              | 295.77                     | 0.0621                  | HOMO-2→LUMO (91%)                                                                                       |
| 4   | 34032.80              | 293.83                     | 0.0350                  | HOMO→LUMO+1 (85%)                                                                                       |
| 5   | 34290.09              | 291.63                     | 0.0457                  | HOMO-1→LUMO+2 (23%), HOMO→LUMO+2 (72%)                                                                  |
| 6   | 35791.91              | 279.39                     | 0.0682                  | HOMO-3→LUMO (27%), HOMO-1→LUMO+2 (39%), HOMO→LUMO+2 (15%)                                               |
| 7   | 36045.17              | 277.43                     | 0.1408                  | HOMO-3→LUMO (23%), HOMO-2→LUMO+1 (12%), HOMO-1→LUMO+1 (27%), HOMO-1→LUMO+2 (21%)                        |
| 8   | 36234.71              | 275.98                     | 0.2189                  | HOMO-3→LUMO (32%), HOMO-2→LUMO+1 (11%), HOMO-1→LUMO+1 (37%)                                             |
| 9   | 36504.91              | 273.94                     | 0.0992                  | HOMO→LUMO+3 (72%)                                                                                       |
| 10  | 36747.68              | 272.13                     | 0.0259                  | HOMO-1→LUMO+3 (25%), HOMO→LUMO+4 (58%)                                                                  |
| 11  | 36982.39              | 270.40                     | 0.0067                  | HOMO-1→LUMO+3 (28%), HOMO→LUMO+5 (12%), HOMO→LUMO+6 (41%)                                               |
| 12  | 37139.67              | 269.25                     | 0.0009                  | HOMO-1→LUMO+7 (21%), HOMO→LUMO+7 (69%)                                                                  |
| 13  | 37153.38              | 269.15                     | 0.0003                  | HOMO→LUMO+5 (54%), HOMO→LUMO+6 (10%)                                                                    |
| 14  | 37391.32              | 267.44                     | 0.0019                  | HOMO-1→LUMO+5 (12%), HOMO-1→LUMO+8 (29%), HOMO→LUMO+8 (40%)                                             |
| 15  | 37490.52              | 266.73                     | 0.0172                  | HOMO-2→LUMO+1 (59%), HOMO-1→LUMO+1 (21%)                                                                |
| 16  | 37788.14              | 264.63                     | 0.0109                  | HOMO-2→LUMO+2 (84%)                                                                                     |
| 17  | 38365.64              | 260.65                     | 0.0060                  | HOMO-1→LUMO+3 (24%), HOMO→LUMO+4 (10%), HOMO→LUMO+6 (24%)                                               |
| 18  | 38500.34              | 259.74                     | 0.0128                  | HOMO-4→LUMO (82%)                                                                                       |
| 19  | 38661.65              | 258.65                     | 0.0020                  | HOMO-2→LUMO+7 (10%), HOMO-1→LUMO+4 (10%), HOMO-1→LUMO+7 (48%), HOMO→LUMO+7 (24%)                        |
| 20  | 38752.79              | 258.05                     | 0.0314                  | HOMO-5→LUMO (76%), HOMO-4→LUMO (14%)                                                                    |
| 21  | 38975.40              | 256.57                     | 0.0057                  | HOMO-2→LUMO+4 (11%), HOMO-1→LUMO+4 (45%), HOMO-1→LUMO+7 (14%)                                           |
| 22  | 39256.08              | 254.74                     | 0.0022                  | HOMO-1→LUMO+5 (17%), HOMO-1→LUMO+8 (21%), HOMO→LUMO+8 (38%)                                             |
| 23  | 39381.91              | 253.92                     | 0.0019                  | HOMO-1→LUMO+6 (35%), HOMO-1→LUMO+8 (20%)                                                                |
| 24  | 39690.82              | 251.95                     | 0.0013                  | HOMO-3→LUMO+1 (10%), HOMO-1→LUMO+5 (27%), HOMO-1→LUMO+8 (10%)                                           |
| 25  | 39797.28              | 251.27                     | 0.0035                  | HOMO-3→LUMO+1 (22%), HOMO-2→LUMO+3 (11%), HOMO-1→LUMO+6 (20%)                                           |
| 26  | 40080.39              | 249.50                     | 0.0061                  | HOMO-3→LUMO+1 (51%), HOMO-2→LUMO+3 (26%)                                                                |
| 27  | 40089.26              | 249.44                     | 0.0026                  | HOMO-6→LUMO (87%)                                                                                       |
| 28  | 40308.64              | 248.09                     | 0.0056                  | HOMO-3→LUMO+2 (40%), HOMO-2→LUMO+4 (29%)                                                                |
| 29  | 40343.32              | 247.87                     | 0.0007                  | HOMO-3→LUMO+2 (50%), HOMO-2→LUMO+4 (24%)                                                                |
| 30  | 40451.40              | 247.21                     | 0.0054                  | HOMO-7→LUMO (85%)                                                                                       |
| 31  | 40621.59              | 246.17                     | 0.0002                  | HOMO-2→LUMO+7 (83%)                                                                                     |
| 32  | 40782.90              | 245.20                     | 0.0191                  | HOMO-8→LUMO (84%)                                                                                       |
| 33  | 40962.76              | 244.12                     | 0.0012                  | HOMO-3→LUMO+3 (10%), HOMO-3→LUMO+6 (12%), HOMO-2→LUMO+4 (13%), HOMO-2→LUMO+5 (10%), HOMO-2→LUMO+6 (20%) |
| 34  | 41153.92              | 242.99                     | 0.0017                  | HOMO-3→LUMO+3 (20%), HOMO-2→LUMO+3 (11%), HOMO-2→LUMO+5 (34%)                                           |
| 35  | 41345.07              | 241.87                     | 0.0046                  | HOMO-3→LUMO+3 (11%), HOMO-2→LUMO+5 (10%), HOMO-2→LUMO+6 (43%), HOMO-2→LUMO+8 (14%)                      |

|    |          |        |        |                                                                                         |
|----|----------|--------|--------|-----------------------------------------------------------------------------------------|
| 36 | 41471.70 | 241.13 | 0.0066 | HOMO-9→LUMO (52%), HOMO-4→LUMO+1 (22%)                                                  |
| 37 | 41487.83 | 241.03 | 0.0018 | HOMO-9→LUMO (18%), HOMO-4→LUMO+1 (53%),<br>HOMO-4→LUMO+2 (12%)                          |
| 38 | 41548.33 | 240.68 | 0.0100 | HOMO-4→LUMO+1 (18%), HOMO-4→LUMO+2 (76%)                                                |
| 39 | 41578.97 | 240.51 | 0.0111 | HOMO-9→LUMO (21%), HOMO-2→LUMO+8 (53%)                                                  |
| 40 | 42062.91 | 237.74 | 0.0024 | HOMO-3→LUMO+4 (24%), HOMO-3→LUMO+5 (42%)                                                |
| 41 | 42221.00 | 236.85 | 0.0009 | HOMO-3→LUMO+3 (12%), HOMO-3→LUMO+6 (31%),<br>HOMO-2→LUMO+6 (14%)                        |
| 42 | 42629.92 | 234.58 | 0.0118 | HOMO-3→LUMO+4 (24%), HOMO-1→LUMO+10 (10%),<br>HOMO→LUMO+10 (38%)                        |
| 43 | 42681.54 | 234.29 | 0.0036 | HOMO-12→LUMO (16%), HOMO→LUMO+9 (27%)                                                   |
| 44 | 42761.39 | 233.86 | 0.0079 | HOMO-3→LUMO+4 (18%), HOMO-3→LUMO+5 (25%),<br>HOMO-3→LUMO+6 (21%)                        |
| 45 | 42950.13 | 232.83 | 0.0025 | HOMO-3→LUMO+8 (16%), HOMO→LUMO+9 (44%)                                                  |
| 46 | 43055.79 | 232.26 | 0.0009 | HOMO-3→LUMO+7 (49%)                                                                     |
| 47 | 43077.56 | 232.14 | 0.0015 | HOMO-13→LUMO (15%), HOMO-3→LUMO+7 (25%)                                                 |
| 48 | 43149.35 | 231.75 | 0.0024 | HOMO-3→LUMO+8 (58%)                                                                     |
| 49 | 43347.76 | 230.69 | 0.0053 | HOMO-14→LUMO+7 (10%), HOMO-10→LUMO+2 (22%),<br>HOMO-5→LUMO+2 (17%), HOMO-3→LUMO+7 (12%) |
| 50 | 43395.35 | 230.44 | 0.0084 | HOMO-12→LUMO (14%), HOMO-10→LUMO+2 (14%),<br>HOMO-5→LUMO+3 (19%)                        |

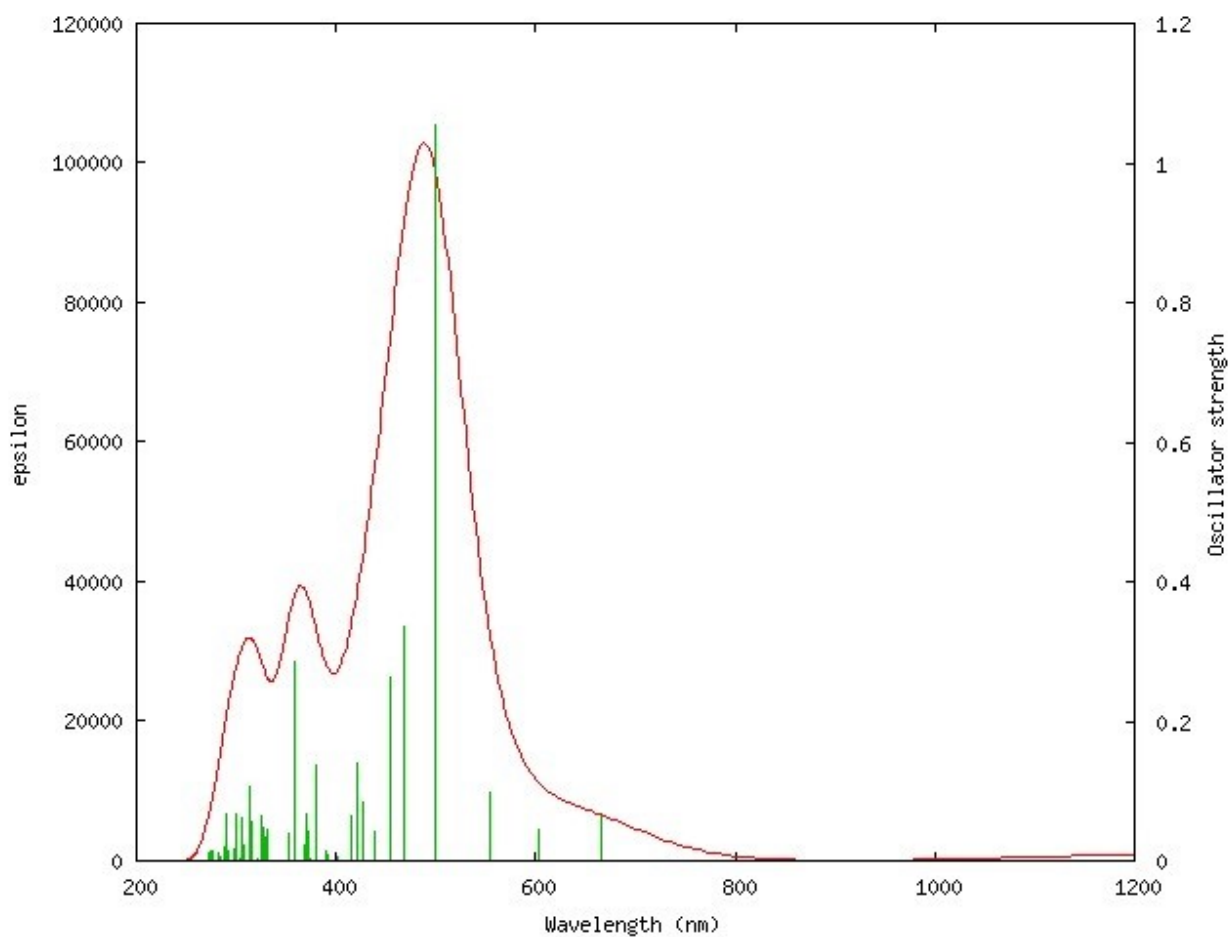

**Fig. S43** Computed absorption spectrum of **9** in solvent phase ( $\text{CH}_2\text{Cl}_2$ )

Table S11. Computed absorption maxima ( $\lambda_{\text{max}}$  nm), Electronic excitation energies (E, eV), and Oscillator strength ( $f$ ) of **9** in solvent phase (CH<sub>2</sub>Cl<sub>2</sub>).

| No. | E (cm <sup>-1</sup> ) | Cal. $\lambda_{\text{max}}$ (nm) | Oscillator Strength $f$ | Main Contributing Configurations                                                                       |
|-----|-----------------------|----------------------------------|-------------------------|--------------------------------------------------------------------------------------------------------|
| 1   | 7699.42               | 1298.80                          | 0.0137                  | HOMO→LUMO (100%)                                                                                       |
| 2   | 15026.21              | 665.50                           | 0.0642                  | HOMO-1→LUMO (81%), HOMO→LUMO+1 (13%)                                                                   |
| 3   | 16568.36              | 603.56                           | 0.0443                  | HOMO-2→LUMO (70%), HOMO→LUMO+1 (17%)                                                                   |
| 4   | 18029.04              | 554.66                           | 0.0987                  | HOMO-3→LUMO (67%), HOMO→LUMO+1 (24%)                                                                   |
| 5   | 20033.34              | 499.17                           | 1.0536                  | HOMO-4→LUMO (12%), HOMO-3→LUMO (24%), HOMO-2→LUMO (15%), HOMO→LUMO+1 (38%)                             |
| 6   | 21369.81              | 467.95                           | 0.3360                  | HOMO→LUMO+2 (84%)                                                                                      |
| 7   | 22019.09              | 454.15                           | 0.2637                  | HOMO-7→LUMO (12%), HOMO-4→LUMO (39%), HOMO-1→LUMO+1 (12%)                                              |
| 8   | 22749.02              | 439.58                           | 0.0426                  | HOMO-7→LUMO (11%), HOMO-5→LUMO (49%), HOMO-4→LUMO (13%), HOMO-1→LUMO+1 (13%)                           |
| 9   | 23391.85              | 427.50                           | 0.0831                  | HOMO-4→LUMO (15%), HOMO-1→LUMO+1 (55%)                                                                 |
| 10  | 23698.35              | 421.97                           | 0.1410                  | HOMO-9→LUMO (11%), HOMO-7→LUMO (24%), HOMO-6→LUMO (13%), HOMO-5→LUMO (33%)                             |
| 11  | 24070.17              | 415.45                           | 0.0654                  | HOMO-6→LUMO (67%), HOMO-4→LUMO (15%)                                                                   |
| 12  | 24892.86              | 401.72                           | 0.0053                  | HOMO-2→LUMO+1 (85%)                                                                                    |
| 13  | 25512.30              | 391.97                           | 0.0091                  | HOMO-8→LUMO (62%), HOMO-7→LUMO (15%)                                                                   |
| 14  | 25585.70              | 390.84                           | 0.0043                  | HOMO-9→LUMO (40%), HOMO-8→LUMO (33%), HOMO-7→LUMO (15%)                                                |
| 15  | 25658.29              | 389.74                           | 0.0137                  | HOMO-13→LUMO (34%), HOMO-11→LUMO (25%), HOMO-9→LUMO (21%)                                              |
| 16  | 26353.54              | 379.46                           | 0.1363                  | HOMO-13→LUMO (17%), HOMO-11→LUMO (30%), HOMO-3→LUMO+1 (21%), HOMO-1→LUMO+2 (18%)                       |
| 17  | 26760.05              | 373.69                           | 0.0027                  | HOMO-10→LUMO (81%)                                                                                     |
| 18  | 26813.28              | 372.95                           | 0.0419                  | HOMO-12→LUMO (34%), HOMO-11→LUMO (20%), HOMO-3→LUMO+1 (14%), HOMO-1→LUMO+2 (15%)                       |
| 19  | 27066.54              | 369.46                           | 0.0667                  | HOMO-12→LUMO (14%), HOMO-3→LUMO+1 (17%), HOMO-1→LUMO+2 (51%)                                           |
| 20  | 27183.49              | 367.87                           | 0.0230                  | HOMO-12→LUMO (39%), HOMO-3→LUMO+1 (35%)                                                                |
| 21  | 27920.69              | 358.16                           | 0.2867                  | HOMO-2→LUMO+2 (87%)                                                                                    |
| 22  | 28353.81              | 352.69                           | 0.0383                  | HOMO-14→LUMO (87%)                                                                                     |
| 23  | 30200.03              | 331.13                           | 0.0443                  | HOMO-4→LUMO+1 (23%), HOMO-3→LUMO+2 (11%), HOMO→LUMO+3 (31%)                                            |
| 24  | 30350.85              | 329.48                           | 0.0325                  | HOMO-4→LUMO+1 (12%), HOMO→LUMO+3 (25%), HOMO→LUMO+4 (46%)                                              |
| 25  | 30581.53              | 326.99                           | 0.0464                  | HOMO-3→LUMO+2 (10%), HOMO→LUMO+3 (31%), HOMO→LUMO+4 (29%)                                              |
| 26  | 30814.62              | 324.52                           | 0.0647                  | HOMO-4→LUMO+1 (16%), HOMO-3→LUMO+2 (41%), HOMO→LUMO+4 (12%)                                            |
| 27  | 31040.46              | 322.16                           | 0.0029                  | HOMO-15→LUMO (14%), HOMO-7→LUMO+1 (12%), HOMO-5→LUMO+1 (29%), HOMO-4→LUMO+1 (16%), HOMO-3→LUMO+2 (13%) |
| 28  | 31634.90              | 316.11                           | 0.0548                  | HOMO-15→LUMO (50%), HOMO-5→LUMO+1 (12%)                                                                |
| 29  | 31759.91              | 314.86                           | 0.0277                  | HOMO-16→LUMO (66%)                                                                                     |
| 30  | 31922.84              | 313.26                           | 0.1068                  | HOMO-16→LUMO (10%), HOMO-7→LUMO+1 (21%), HOMO-6→LUMO+1 (25%), HOMO-5→LUMO+1 (18%)                      |
| 31  | 32418.87              | 308.46                           | 0.0116                  | HOMO-6→LUMO+1 (27%), HOMO→LUMO+5 (29%)                                                                 |
| 32  | 32598.74              | 306.76                           | 0.0237                  | HOMO-6→LUMO+1 (11%), HOMO→LUMO+5 (31%),                                                                |

|    |          |        |        |                                                                     |
|----|----------|--------|--------|---------------------------------------------------------------------|
|    |          |        |        | HOMO→LUMO+7 (29%)                                                   |
| 33 | 32785.86 | 305.01 | 0.0610 | HOMO→LUMO+6 (10%), HOMO→LUMO+7 (41%),<br>HOMO→LUMO+8 (24%)          |
| 34 | 32864.90 | 304.28 | 0.0027 | HOMO→LUMO+5 (12%), HOMO→LUMO+6 (59%),<br>HOMO→LUMO+7 (21%)          |
| 35 | 33099.61 | 302.12 | 0.0007 | HOMO-9→LUMO+1 (22%), HOMO→LUMO+9 (57%)                              |
| 36 | 33382.71 | 299.56 | 0.0677 | HOMO-5→LUMO+2 (13%), HOMO→LUMO+8 (50%)                              |
| 37 | 33647.26 | 297.20 | 0.0165 | HOMO→LUMO+10 (77%)                                                  |
| 38 | 34180.40 | 292.57 | 0.0112 | HOMO-9→LUMO+1 (34%), HOMO-7→LUMO+1 (15%),<br>HOMO→LUMO+9 (35%)      |
| 39 | 34274.77 | 291.76 | 0.0135 | HOMO-17→LUMO (10%), HOMO-5→LUMO+2 (47%)                             |
| 40 | 34391.72 | 290.77 | 0.0683 | HOMO-11→LUMO+1 (22%), HOMO-4→LUMO+2 (38%)                           |
| 41 | 34503.02 | 289.83 | 0.0022 | HOMO-8→LUMO+1 (70%)                                                 |
| 42 | 34540.93 | 289.51 | 0.0181 | HOMO-17→LUMO (49%)                                                  |
| 43 | 34685.31 | 288.31 | 0.0189 | HOMO-13→LUMO+1 (10%), HOMO-11→LUMO+1 (33%),<br>HOMO-4→LUMO+2 (31%)  |
| 44 | 35144.24 | 284.54 | 0.0041 | HOMO-13→LUMO+1 (26%), HOMO-12→LUMO+1 (42%),<br>HOMO-11→LUMO+1 (16%) |
| 45 | 35282.97 | 283.42 | 0.0051 | HOMO-10→LUMO+1 (82%)                                                |
| 46 | 35485.41 | 281.81 | 0.0111 | HOMO-13→LUMO+1 (25%), HOMO-12→LUMO+1 (50%)                          |
| 47 | 36135.50 | 276.74 | 0.0131 | HOMO-13→LUMO+1 (10%), HOMO-6→LUMO+2 (71%)                           |
| 48 | 36372.63 | 274.93 | 0.0141 | HOMO-9→LUMO+2 (11%), HOMO-7→LUMO+2 (55%)                            |
| 49 | 36504.91 | 273.94 | 0.0125 | HOMO-8→LUMO+2 (83%)                                                 |
| 50 | 36739.61 | 272.19 | 0.0119 | HOMO-13→LUMO+2 (29%)                                                |

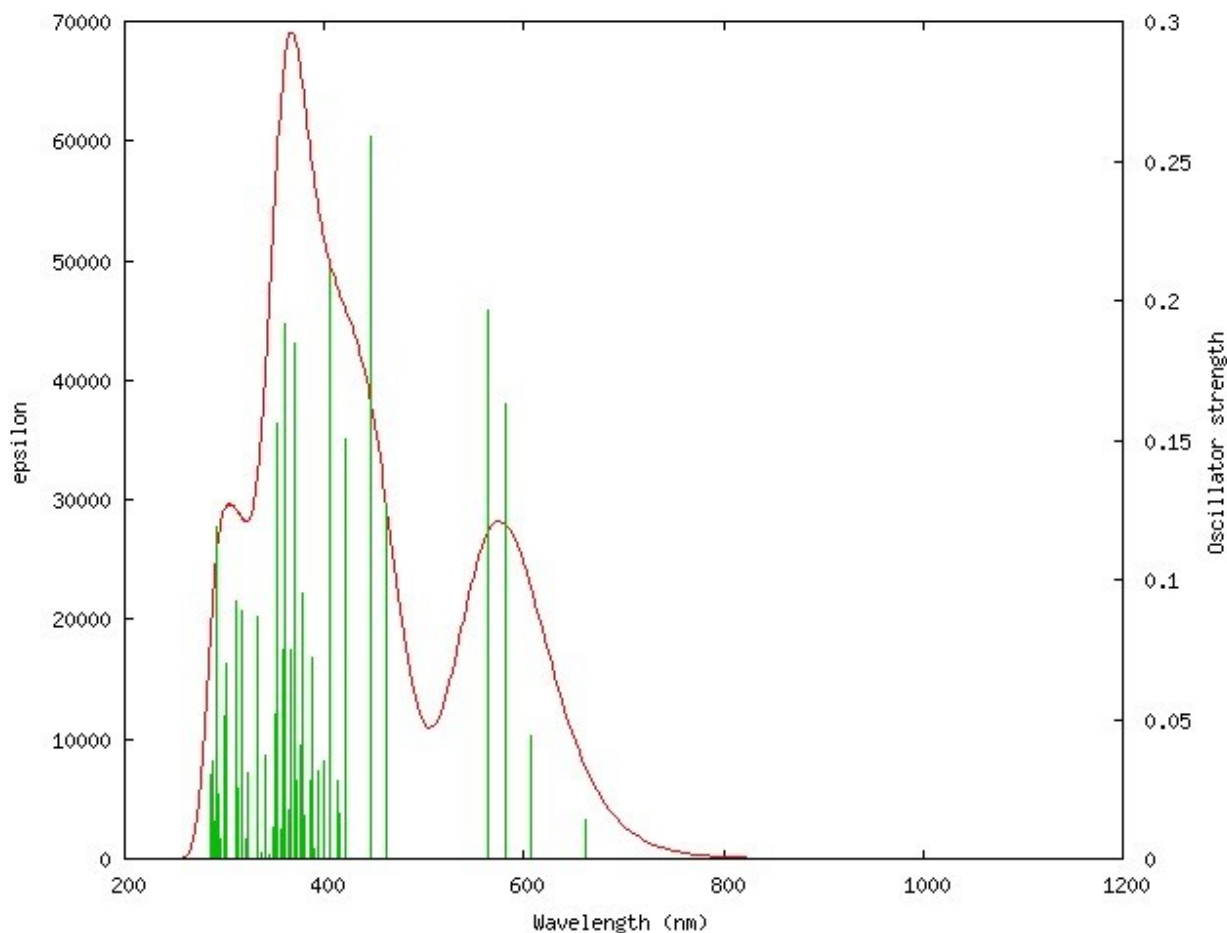

Fig. S44 Computed absorption spectrum of **10** in solvent phase (CH<sub>2</sub>Cl<sub>2</sub>)

Table S12. Computed absorption maxima ( $\lambda_{\max}$  nm), Electronic excitation energies (E, eV), and Oscillator strength ( $f$ ) of **10** in solvent phase (CH<sub>2</sub>Cl<sub>2</sub>).

| No. | E (cm <sup>-1</sup> ) | Cal. $\lambda_{\max}$ (nm) | Oscillator Strength $f$ | Main Contributing Configurations                                             |
|-----|-----------------------|----------------------------|-------------------------|------------------------------------------------------------------------------|
| 1   | 15111.71              | 661.74                     | 0.0142                  | HOMO-1→LUMO (11%), HOMO→LUMO (80%)                                           |
| 2   | 16498.99              | 606.10                     | 0.0441                  | HOMO-1→LUMO (64%), HOMO→LUMO+1 (29%)                                         |
| 3   | 17206.34              | 581.18                     | 0.1628                  | HOMO-1→LUMO+1 (66%), HOMO→LUMO (13%), HOMO→LUMO+1 (10%)                      |
| 4   | 17712.06              | 564.59                     | 0.1963                  | HOMO-1→LUMO (13%), HOMO-1→LUMO+1 (25%), HOMO→LUMO+1 (54%)                    |
| 5   | 21656.94              | 461.75                     | 0.1272                  | HOMO-2→LUMO (91%)                                                            |
| 6   | 22396.56              | 446.50                     | 0.2589                  | HOMO-2→LUMO+1 (80%)                                                          |
| 7   | 23726.58              | 421.47                     | 0.1504                  | HOMO-5→LUMO (10%), HOMO-3→LUMO (14%), HOMO-3→LUMO+1 (21%)                    |
| 8   | 24054.85              | 415.72                     | 0.0160                  | HOMO-5→LUMO (32%), HOMO-4→LUMO (13%), HOMO-3→LUMO (30%)                      |
| 9   | 24207.29              | 413.10                     | 0.0280                  | HOMO-5→LUMO (23%), HOMO-3→LUMO (13%), HOMO-3→LUMO+1 (16%), HOMO→LUMO+2 (17%) |
| 10  | 24621.05              | 406.16                     | 0.2111                  | HOMO-4→LUMO (48%), HOMO-4→LUMO+1 (14%), HOMO-3→LUMO (17%)                    |
| 11  | 24972.71              | 400.44                     | 0.0251                  | HOMO-9→LUMO (10%), HOMO-3→LUMO+1 (30%),                                      |

|    |          |        |        |                                                                                               |
|----|----------|--------|--------|-----------------------------------------------------------------------------------------------|
|    |          |        |        | HOMO→LUMO+2 (30%)                                                                             |
| 12 | 25350.99 | 394.46 | 0.0316 | HOMO-9→LUMO (13%), HOMO-7→LUMO (18%), HOMO-6→LUMO (14%), HOMO-3→LUMO (14%), HOMO→LUMO+2 (15%) |
| 13 | 25609.89 | 390.47 | 0.0038 | HOMO-7→LUMO (12%), HOMO-7→LUMO+1 (11%), HOMO-6→LUMO (38%), HOMO-5→LUMO+1 (11%)                |
| 14 | 25746.20 | 388.41 | 0.0717 | HOMO-7→LUMO (24%), HOMO-5→LUMO+1 (28%)                                                        |
| 15 | 25968.01 | 385.09 | 0.0279 | HOMO-4→LUMO (11%), HOMO-4→LUMO+1 (20%), HOMO-1→LUMO+2 (30%), HOMO→LUMO+2 (10%)                |
| 16 | 26361.61 | 379.34 | 0.0155 | HOMO-1→LUMO+2 (11%), HOMO-1→LUMO+3 (26%), HOMO→LUMO+3 (47%)                                   |
| 17 | 26398.71 | 378.81 | 0.0948 | HOMO-4→LUMO+1 (38%), HOMO-1→LUMO+2 (24%)                                                      |
| 18 | 26530.18 | 376.93 | 0.0409 | HOMO-12→LUMO (19%), HOMO-9→LUMO (22%), HOMO-8→LUMO (11%), HOMO-6→LUMO+1 (10%)                 |
| 19 | 26853.61 | 372.39 | 0.0281 | HOMO-9→LUMO (23%), HOMO-8→LUMO (59%)                                                          |
| 20 | 26885.87 | 371.94 | 0.0078 | HOMO-10→LUMO (79%)                                                                            |
| 21 | 26999.60 | 370.38 | 0.1847 | HOMO-12→LUMO (16%), HOMO-8→LUMO (15%), HOMO-6→LUMO+1 (14%)                                    |
| 22 | 27279.47 | 366.58 | 0.0748 | HOMO-6→LUMO (12%), HOMO-1→LUMO+3 (14%), HOMO→LUMO+3 (13%)                                     |
| 23 | 27515.79 | 363.43 | 0.0176 | HOMO-7→LUMO (17%), HOMO-7→LUMO+1 (13%), HOMO-6→LUMO+1 (28%)                                   |
| 24 | 27713.40 | 360.84 | 0.1919 | HOMO-9→LUMO+1 (35%), HOMO-1→LUMO+3 (18%)                                                      |
| 25 | 27886.01 | 358.60 | 0.0745 | HOMO-9→LUMO+1 (21%), HOMO-7→LUMO+1 (24%)                                                      |
| 26 | 28069.09 | 356.26 | 0.0105 | HOMO-11→LUMO (60%), HOMO-11→LUMO+1 (25%)                                                      |
| 27 | 28326.39 | 353.03 | 0.1562 | HOMO-14→LUMO (12%), HOMO-13→LUMO (21%), HOMO-13→LUMO+1 (11%), HOMO-7→LUMO+1 (11%)             |
| 28 | 28523.19 | 350.59 | 0.0515 | HOMO-15→LUMO (39%), HOMO-14→LUMO (17%), HOMO-13→LUMO (12%)                                    |
| 29 | 28735.31 | 348.00 | 0.0115 | HOMO-13→LUMO (19%), HOMO-13→LUMO+1 (16%)                                                      |
| 30 | 29007.12 | 344.74 | 0.0011 | HOMO-9→LUMO+1 (11%), HOMO-8→LUMO+1 (81%)                                                      |
| 31 | 29366.85 | 340.52 | 0.0372 | HOMO-13→LUMO (21%), HOMO-13→LUMO+1 (14%), HOMO-12→LUMO+1 (25%)                                |
| 32 | 29703.99 | 336.66 | 0.0020 | HOMO-10→LUMO+1 (87%)                                                                          |
| 33 | 29937.09 | 334.03 | 0.0142 | HOMO-13→LUMO+1 (24%), HOMO-12→LUMO+1 (46%)                                                    |
| 34 | 30035.49 | 332.94 | 0.0049 | HOMO-11→LUMO (31%), HOMO-11→LUMO+1 (65%)                                                      |
| 35 | 30095.17 | 332.28 | 0.0865 | HOMO-15→LUMO (19%), HOMO-14→LUMO (12%), HOMO-14→LUMO+1 (14%), HOMO-13→LUMO (10%)              |
| 36 | 30921.90 | 323.40 | 0.0308 | HOMO-15→LUMO+1 (17%), HOMO-14→LUMO+1 (39%), HOMO-2→LUMO+2 (21%)                               |
| 37 | 31213.07 | 320.38 | 0.0073 | HOMO-15→LUMO+1 (36%), HOMO-2→LUMO+2 (33%)                                                     |
| 38 | 31487.30 | 317.59 | 0.0886 | HOMO-17→LUMO (21%), HOMO-16→LUMO (15%), HOMO-14→LUMO+1 (17%), HOMO-2→LUMO+2 (31%)             |
| 39 | 31897.83 | 313.50 | 0.0254 | HOMO-17→LUMO+1 (11%), HOMO-16→LUMO+1 (30%), HOMO-2→LUMO+3 (25%)                               |
| 40 | 32026.08 | 312.25 | 0.0921 | HOMO-18→LUMO (19%), HOMO-17→LUMO (13%), HOMO-16→LUMO (10%), HOMO-2→LUMO+3 (36%)               |
| 41 | 32162.39 | 310.92 | 0.0102 | HOMO-17→LUMO (36%), HOMO-16→LUMO (19%), HOMO-2→LUMO+3 (21%)                                   |
| 42 | 33091.54 | 302.19 | 0.0700 | HOMO-18→LUMO (54%), HOMO-16→LUMO+1 (19%), HOMO-2→LUMO+3 (10%)                                 |
| 43 | 33427.88 | 299.15 | 0.0511 | HOMO-4→LUMO+2 (10%), HOMO-3→LUMO+2 (63%)                                                      |
| 44 | 33777.12 | 296.06 | 0.0067 | HOMO-17→LUMO+1 (32%), HOMO-16→LUMO+1 (17%),                                                   |



|    |          |        |        |                                                                                        |
|----|----------|--------|--------|----------------------------------------------------------------------------------------|
|    |          |        |        | HOMO-5→LUMO+3 (13%), HOMO-3→LUMO+3 (12%)                                               |
| 45 | 34062.64 | 293.58 | 0.0232 | HOMO-18→LUMO+1 (20%), HOMO-4→LUMO+2 (13%),<br>HOMO-4→LUMO+3 (10%), HOMO-3→LUMO+3 (25%) |
| 46 | 34161.85 | 292.72 | 0.1190 | HOMO-18→LUMO+1 (16%), HOMO-17→LUMO+1 (31%),<br>HOMO-4→LUMO+2 (15%)                     |
| 47 | 34456.24 | 290.22 | 0.0053 | HOMO-18→LUMO+1 (28%), HOMO-5→LUMO+2 (45%)                                              |
| 48 | 34582.87 | 289.16 | 0.0136 | HOMO-5→LUMO+2 (32%), HOMO-4→LUMO+2 (27%),<br>HOMO→LUMO+4 (13%)                         |
| 49 | 34745.80 | 287.80 | 0.0349 | HOMO-1→LUMO+4 (10%), HOMO→LUMO+4 (51%)                                                 |
| 50 | 34957.12 | 286.06 | 0.0302 | HOMO-5→LUMO+3 (32%), HOMO-4→LUMO+3 (11%), HOMO-<br>3→LUMO+3 (10%), HOMO→LUMO+4 (12%)   |

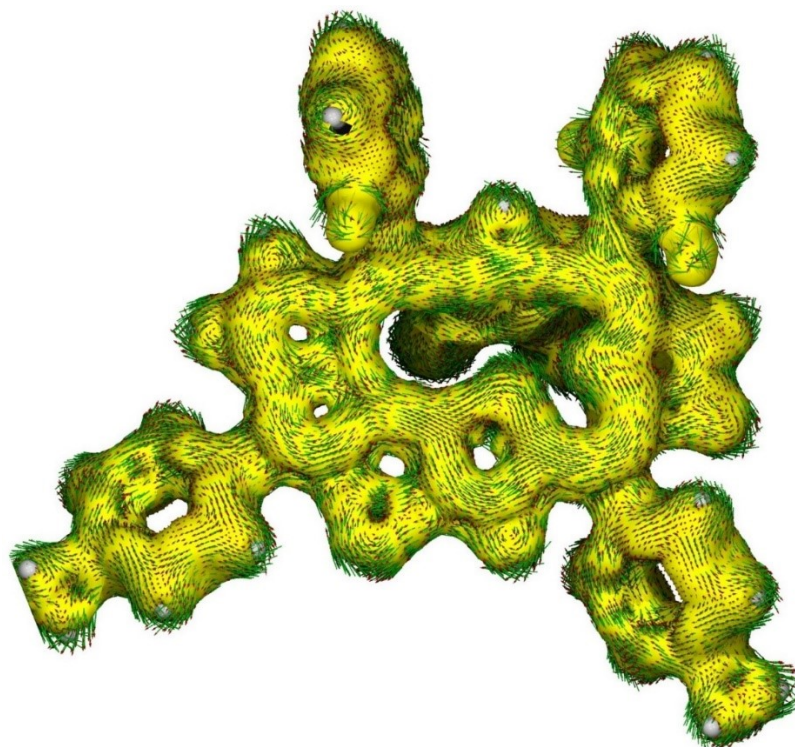

**Fig. S45** The Anisotropy of Induced Current Density (AICD) plot of **9**. A continuous anti-clockwise ring current along the macrocycle indicating the anti-aromatic nature of macrocycle

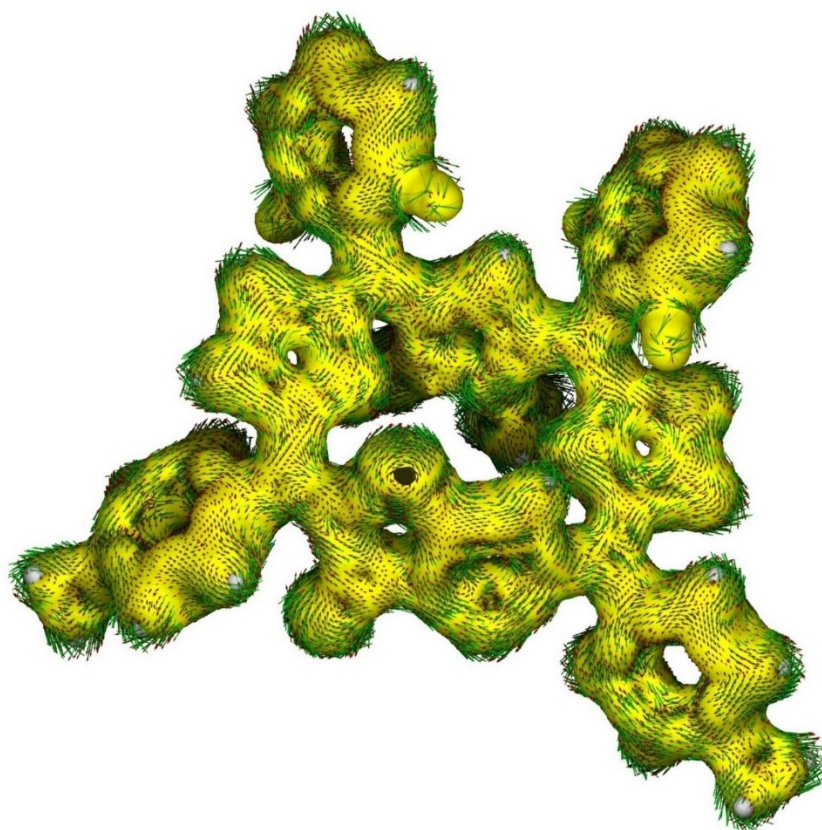

**Fig. S46** The Anisotropy of Induced Current Density (AICD) plot of **10**

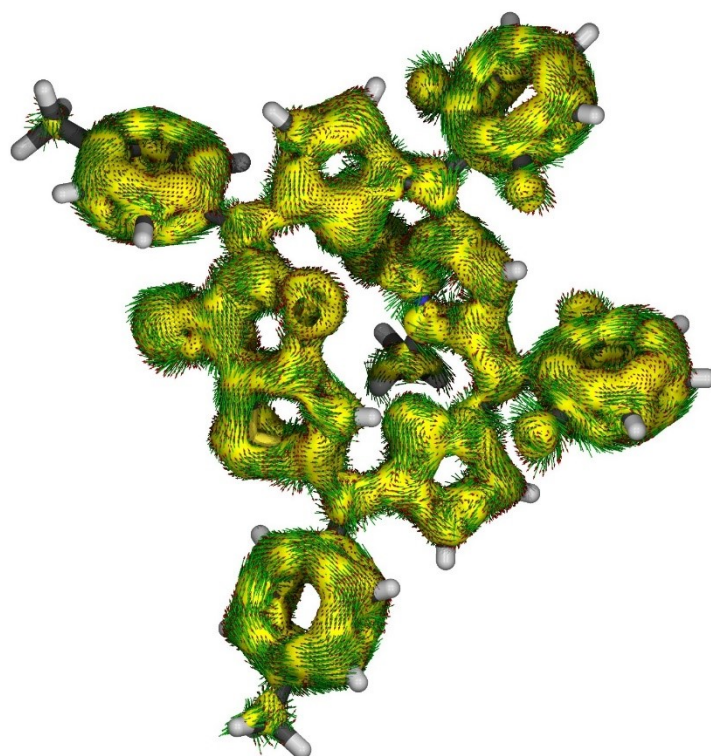

**Fig. S47** The Anisotropy of Induced Current Density (AICD)<sub>π</sub> plot of **10** indicating the nonaromatic nature of macrocycle

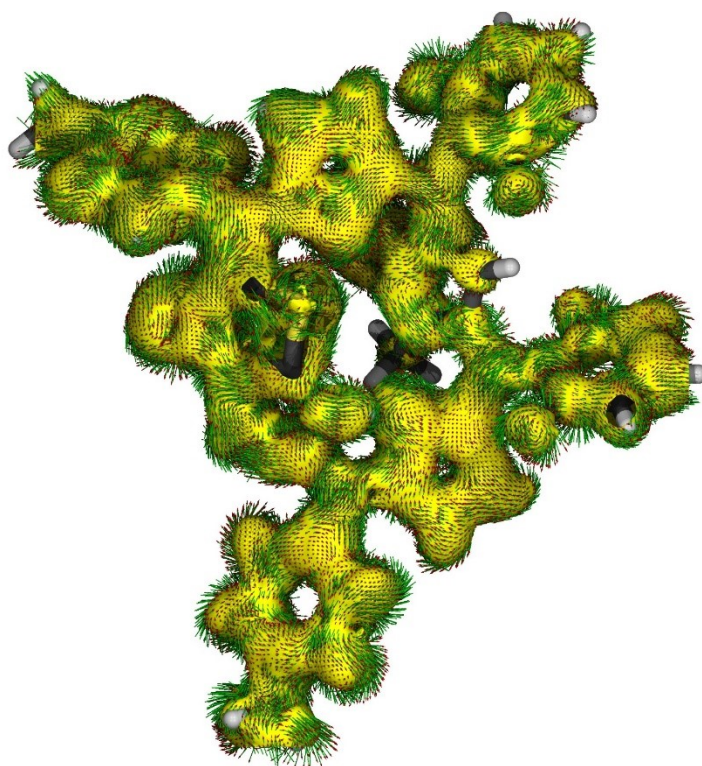

**Fig. S48** The Anisotropy of Induced Current Density (AICD)<sub>σ</sub> plot of **10** indicating the sigma aromatic nature of macrocycle

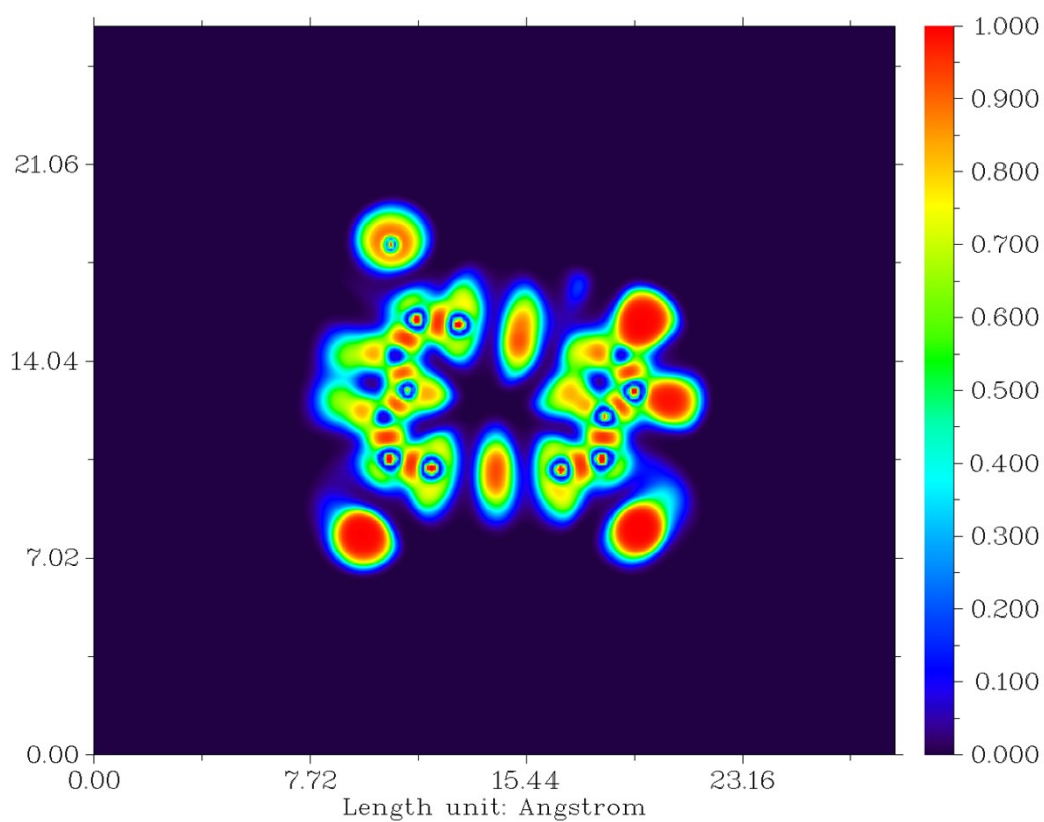

**Fig. S49** Color-filled map of the electron localization function of **7**

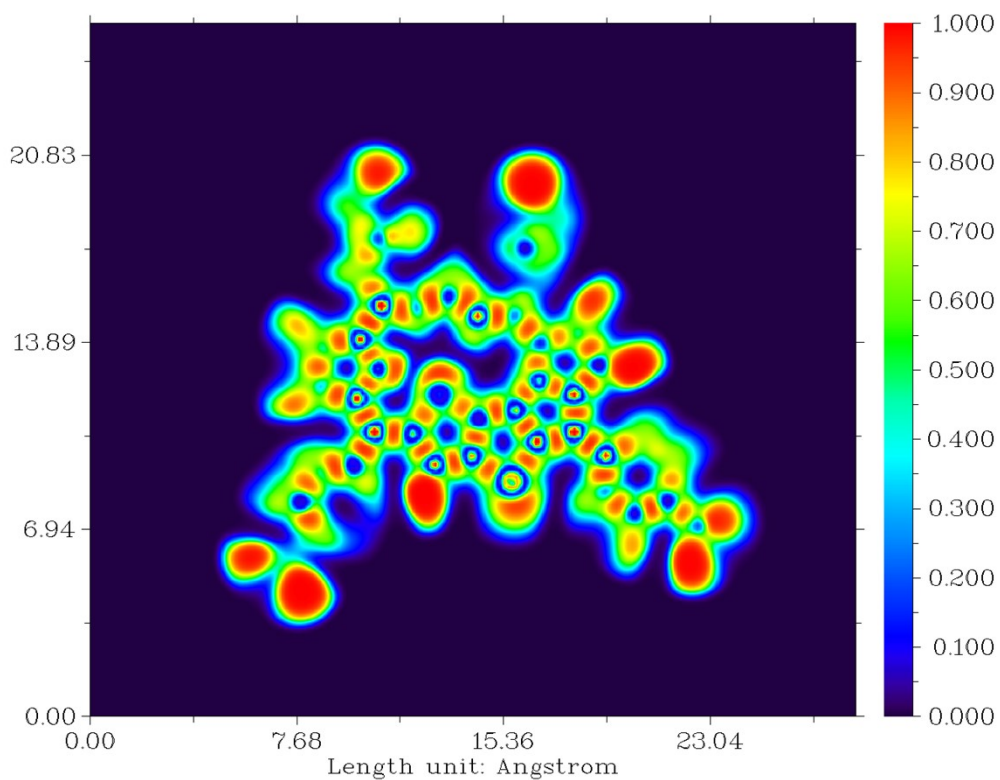

**Fig. S50** Color-filled map of the electron localization function of **9**

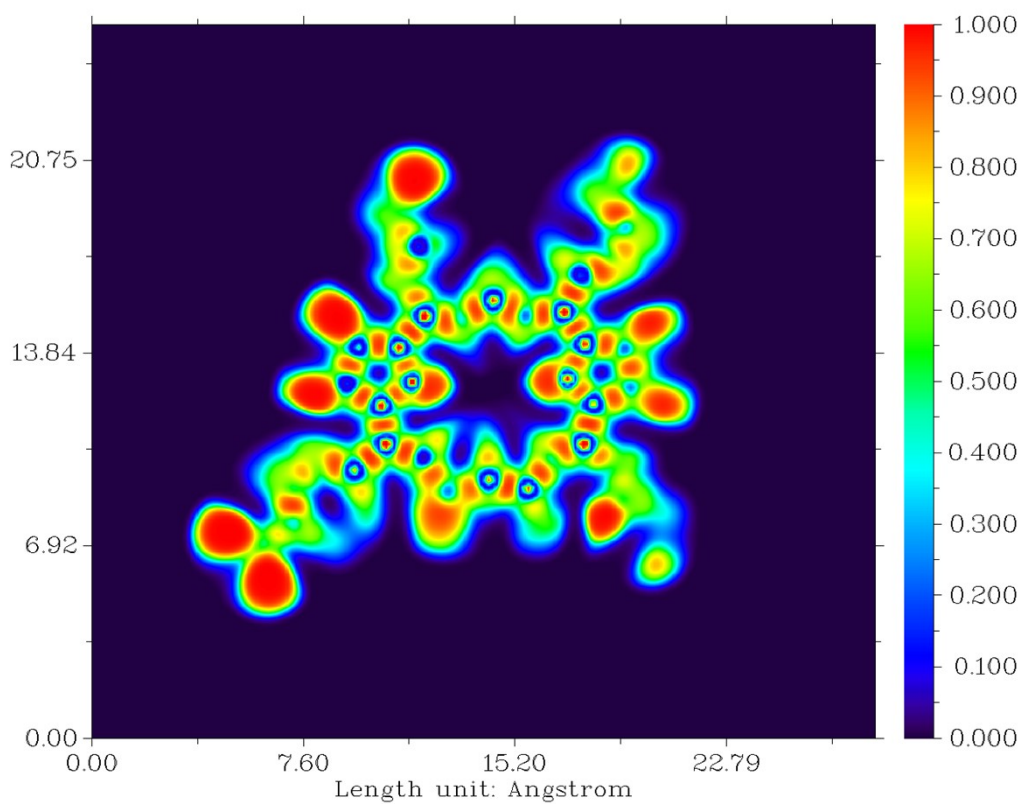

**Fig. S51** Color-filled map of the electron localization function of **10**

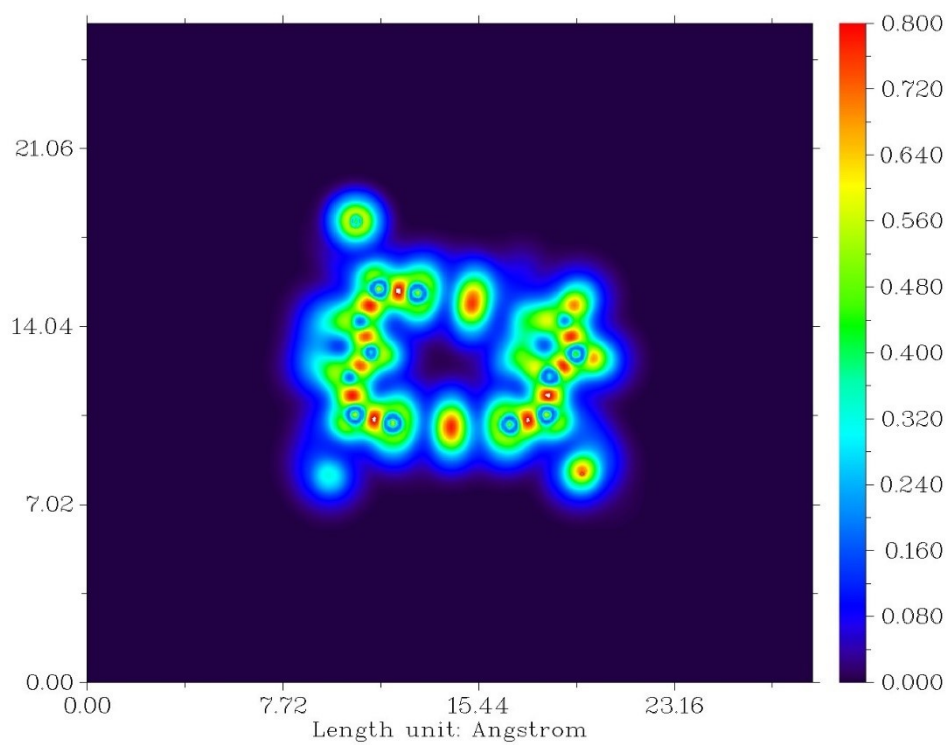

**Fig. S52** Computed contour map of the  $\pi$ -localized orbital locator of **7**

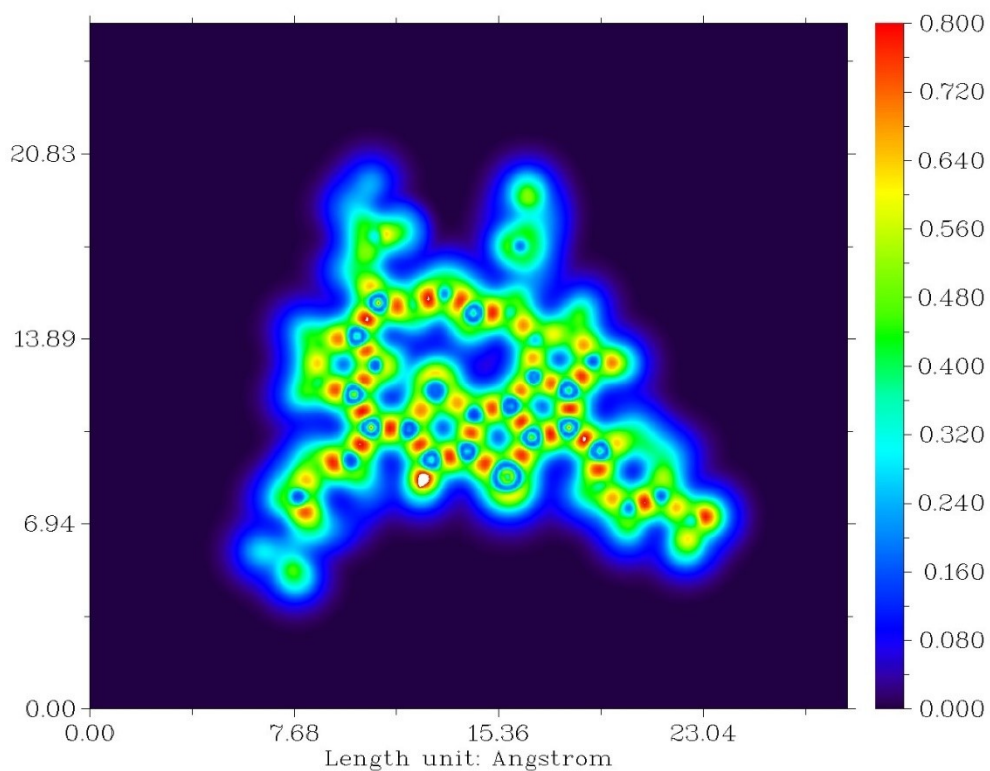

**Fig. S53** Computed contour map of the  $\pi$ -localized orbital locator of **9**

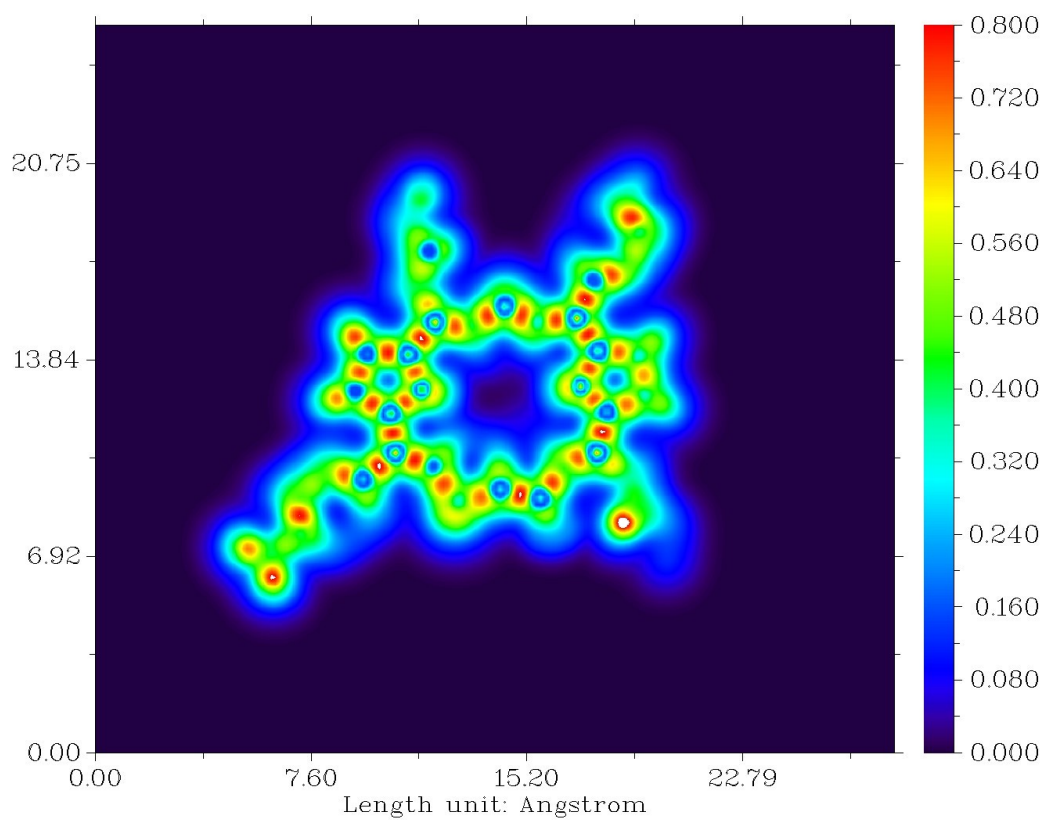

**Fig. S54** Computed contour map of the  $\pi$ -localized orbital locator of **10**

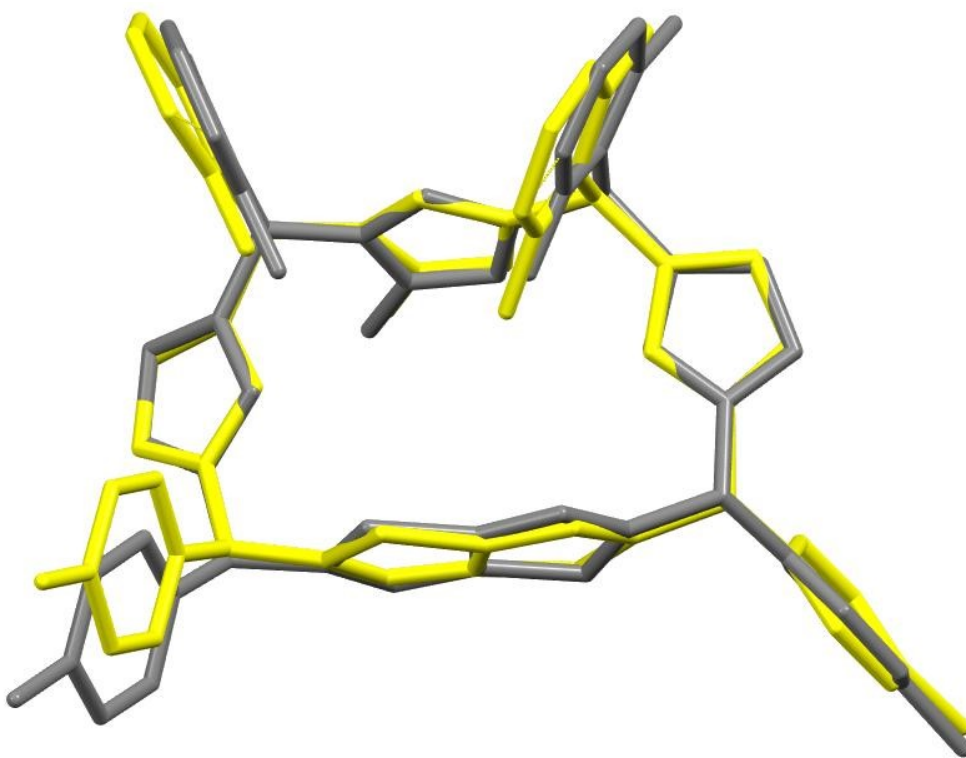

**Fig. S55** Overlay plot (DFT, grey and XRD, yellow) of structure **7**. Hydrogen atoms are omitted for clarity.

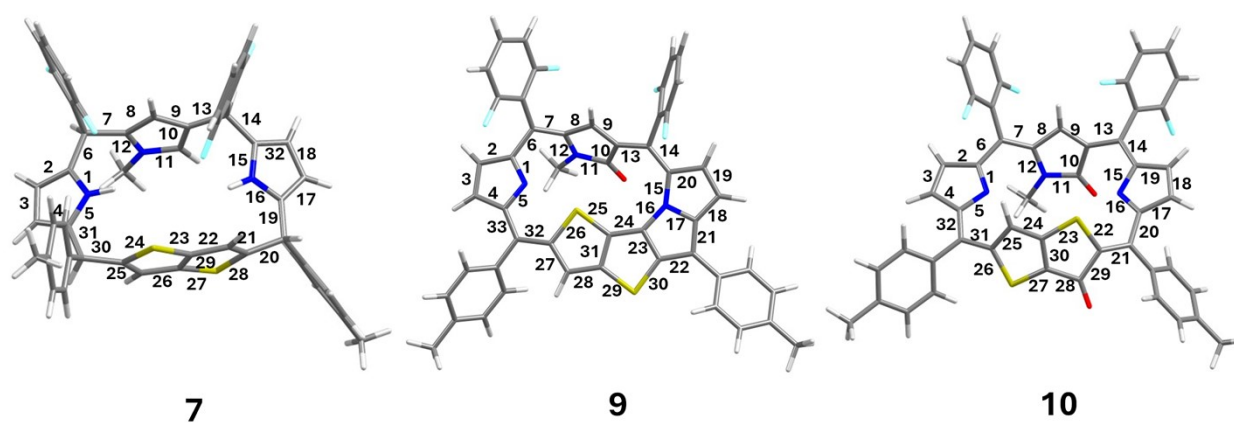

Fig. S56 Label used to show the computed Weiberg Bond Index and  $\pi$ -character of each bond

Table S14. Computed Weiberg Bond Index and  $\pi$ -character of each bond.

| Number of Bond | 7                  |                              | 9                  |                              | 10                 |                              |
|----------------|--------------------|------------------------------|--------------------|------------------------------|--------------------|------------------------------|
|                | Wieberg Bond Index | $\pi$ -character of the bond | Wieberg Bond Index | $\pi$ -character of the bond | Wieberg Bond Index | $\pi$ -character of the bond |
| 1              | 1.177              | 0.161                        | 1.478              | 0.309                        | 1.531              | 0.435                        |
| 2              | 1.521              | 0.263                        | 1.170              | 0.182                        | 1.110              | 0.273                        |
| 3              | 1.322              | 0.302                        | 1.650              | 0.490                        | 1.722              | 0.616                        |
| 4              | 1.526              | 0.402                        | 1.163              | 0.251                        | 1.114              | 0.138                        |
| 5              | 1.177              | 0.315                        | 1.173              | 0.406                        | 1.156              | 0.304                        |
| 6              | 0.984              | 0.405                        | 1.061              | 0.370                        | 1.107              | 0.194                        |
| 7              | 0.991              | 0.253                        | 1.450              | 0.165                        | 1.467              | 0.301                        |
| 8              | 1.522              | 0.274                        | 1.144              | 0.165                        | 1.112              | 0.228                        |
| 9              | 1.293              | 0.353                        | 1.596              | 0.280                        | 1.659              | 0.276                        |
| 10             | 1.526              | 0.256                        | 1.006              | 0.211                        | 0.984              | 0.155                        |
| 11             | 1.169              | 0.145                        | 1.050              | 0.261                        | 1.043              | 0.248                        |
| 12             | 1.155              | 0.164                        | 1.108              | 0.157                        | 1.120              | 0.240                        |
| 13             | 0.986              | 0.104                        | 1.108              | 0.150                        | 1.077              | 0.210                        |
| 14             | 0.991              | 0.281                        | 1.536              | 0.505                        | 1.562              | 0.388                        |
| 15             | 1.176              | 0.327                        | 1.037              | 0.232                        | 1.130              | 0.190                        |
| 16             | 1.181              | 0.342                        | 1.070              | 0.292                        | 1.610              | 0.388                        |
| 17             | 1.523              | 0.486                        | 1.098              | 0.430                        | 1.096              | 0.326                        |
| 18             | 1.319              | 0.186                        | 1.163              | 0.333                        | 1.738              | 0.550                        |
| 19             | 0.984              | 0.295                        | 1.677              | 0.676                        | 1.101              | 0.167                        |
| 20             | 0.998              | 0.168                        | 1.134              | 0.168                        | 1.042              | 0.167                        |
| 21             | 1.612              | 0.312                        | 1.377              | 0.403                        | 1.624              | 0.238                        |
| 22             | 1.223              | 0.165                        | 1.240              | 0.257                        | 1.054              | 0.188                        |
| 23             | 1.126              | 0.330                        | 1.332              | 0.359                        | 1.070              | 0.309                        |
| 24             | 1.150              | 0.394                        | 1.247              | 0.251                        | 1.278              | 0.220                        |
| 25             | 1.611              | 0.501                        | 1.102              | 0.459                        | 1.500              | 0.333                        |
| 26             | 1.233              | 0.118                        | 1.109              | 0.509                        | 1.154              | 0.314                        |
| 27             | 1.128              | 0.275                        | 1.411              | 0.415                        | 1.130              | 0.224                        |
| 28             | 1.148              | 0.350                        | 1.342              | 0.348                        | 1.096              | 0.172                        |
| 29             | 1.410              | 0.297                        | 1.086              | 0.498                        | 1.003              | 0.136                        |
| 30             | 0.996              | 0.295                        | 1.123              | 0.485                        | 1.417              | 0.287                        |
| 31             | 0.989              | 0.162                        | 1.313              | 0.329                        | 1.108              | 0.126                        |
| 32             | 1.526              | 0.506                        | 1.217              | 0.232                        | 1.506              | 0.388                        |
| 33             | -                  | -                            | 1.397              | 0.380                        | -                  | -                            |

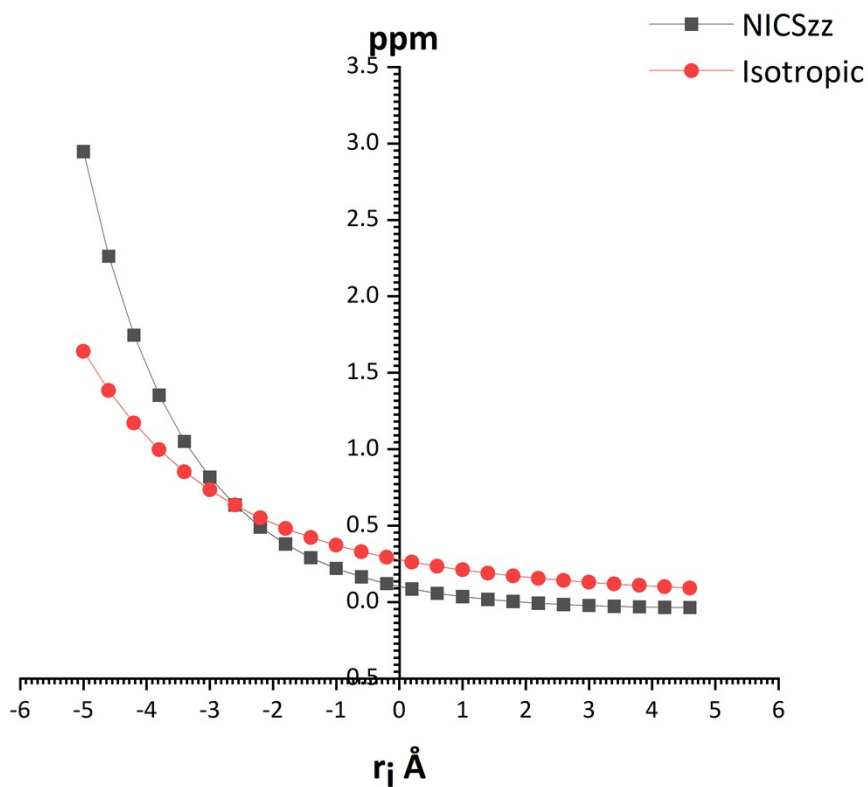

Fig. S57 Isotropic NICS and NICSzz scan plot of **9** where NICSzz is the out of plane contribution

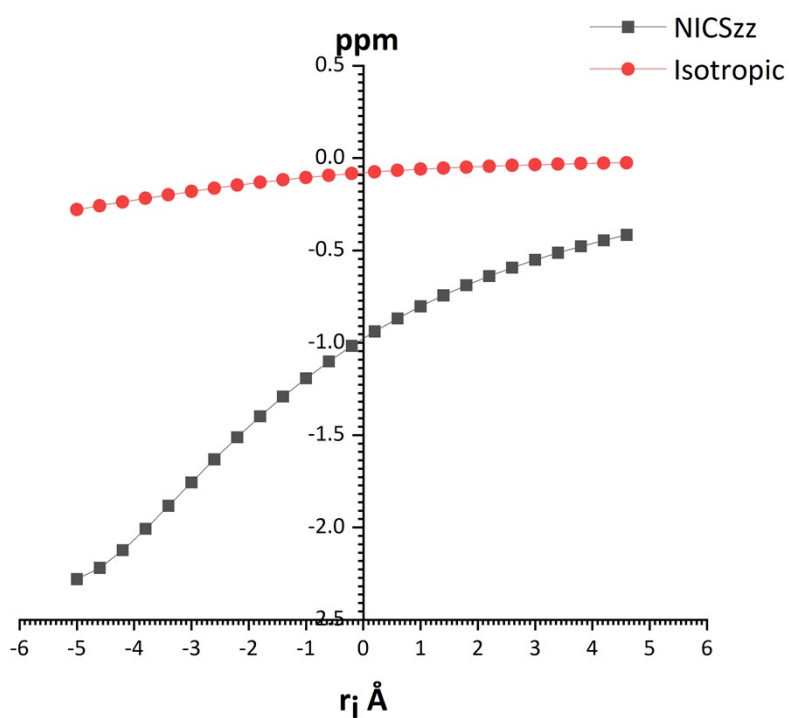

Fig. S58 Isotropic NICS and NICSzz scan plot of **10** where NICSzz is the out of plane contribution



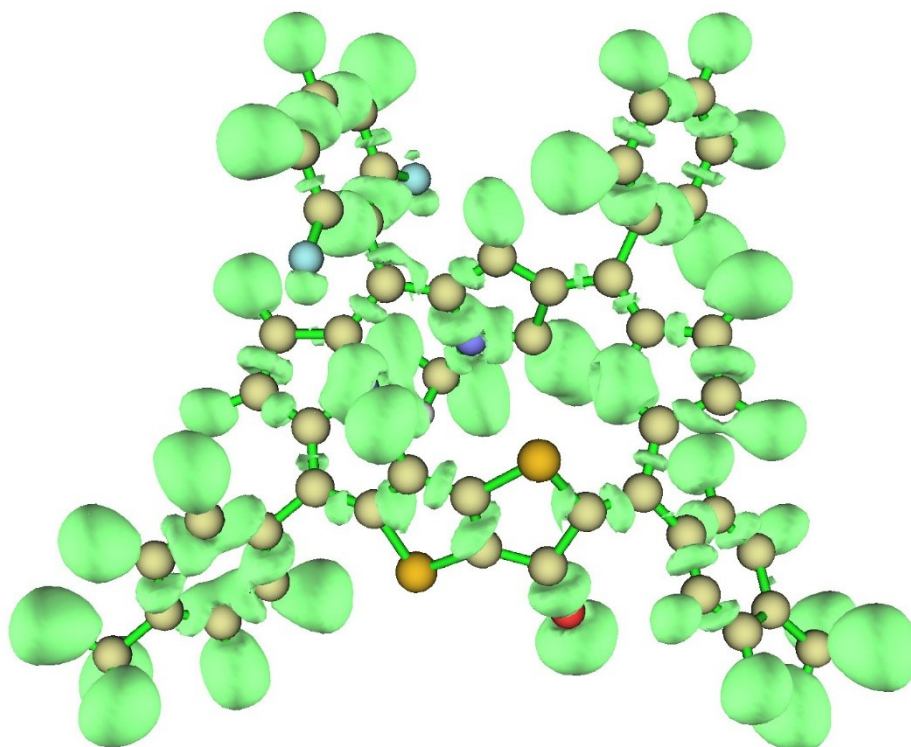

**Fig. S59** Computed ELF- $\sigma$  index of **10**

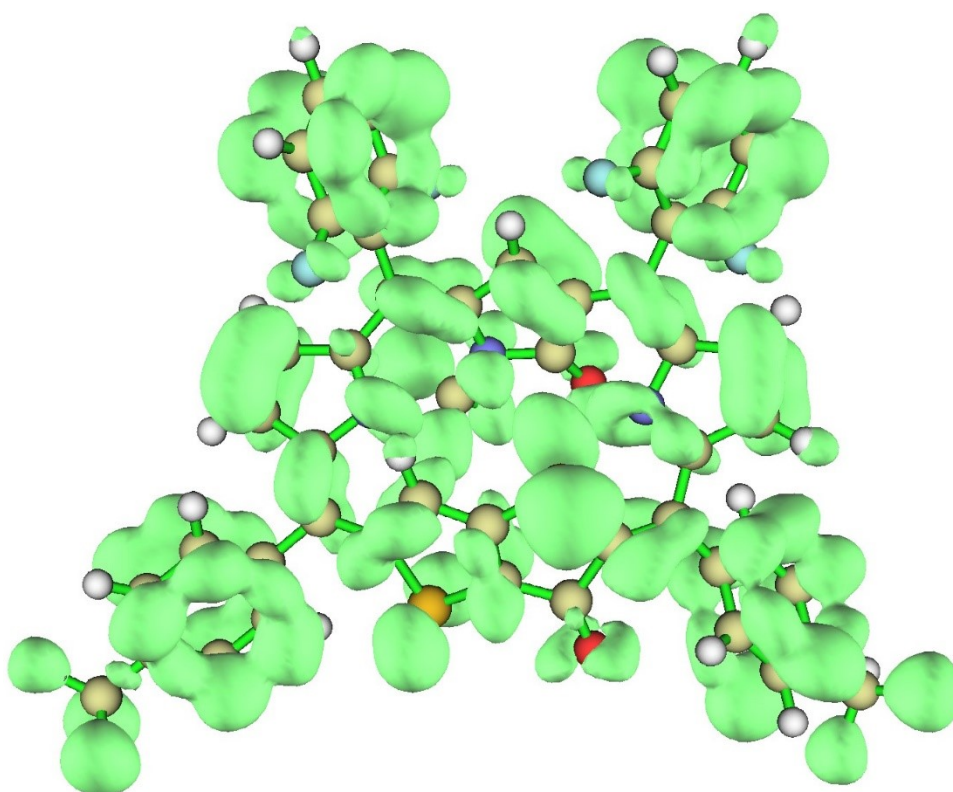

**Fig.S60** Computed ELF- $\pi$  index of **10**























|   |              |              |              |   |              |              |              |
|---|--------------|--------------|--------------|---|--------------|--------------|--------------|
| 6 | 0.816764000  | -3.380514000 | -0.317572000 | 1 | -4.722049000 | -0.424906000 | 1.604960000  |
| 6 | -1.477964000 | -2.413147000 | -0.635762000 | 1 | 3.616743000  | 1.210495000  | 0.537902000  |
| 6 | -1.067976000 | -2.486308000 | 0.689237000  | 6 | 4.433318000  | 2.044126000  | -1.203617000 |
| 6 | 0.229693000  | -3.044728000 | 0.875296000  | 6 | 5.332395000  | 2.800164000  | -0.445833000 |
| 1 | 0.727575000  | -3.166941000 | 1.829074000  | 6 | 4.542723000  | 2.215597000  | -2.587379000 |
| 6 | 3.406939000  | 1.134624000  | -0.535126000 | 6 | 6.272522000  | 3.666362000  | -0.992525000 |
| 6 | -2.722546000 | -1.749358000 | -0.832094000 | 6 | 5.463782000  | 3.064414000  | -3.188970000 |
| 1 | -3.188621000 | -1.574160000 | -1.793605000 | 6 | 6.333161000  | 3.794278000  | -2.378641000 |
| 6 | -3.253327000 | -1.295665000 | 0.345944000  | 1 | 6.932730000  | 4.216778000  | -0.332351000 |
| 6 | 1.981298000  | 1.644526000  | -0.706946000 | 1 | 5.484510000  | 3.138555000  | -4.270160000 |
| 6 | 1.230357000  | 2.346709000  | 0.281102000  | 1 | 7.058994000  | 4.463261000  | -2.829306000 |
| 1 | 1.570134000  | 2.594379000  | 1.276690000  | 9 | 3.712272000  | 1.517807000  | -3.393966000 |
| 6 | 0.004922000  | 2.691007000  | -0.260754000 | 9 | 5.289473000  | 2.687795000  | 0.902892000  |
| 6 | 1.177797000  | 1.578954000  | -1.828859000 | 1 | 2.305425000  | -4.418842000 | -1.436339000 |
| 1 | 1.361959000  | 1.136706000  | -2.795121000 | 6 | 2.820456000  | -4.570334000 | 0.622117000  |
| 6 | -4.419173000 | -0.336970000 | 0.551329000  | 6 | 2.501976000  | -5.931381000 | 0.722505000  |
| 6 | -3.966208000 | 1.095470000  | 0.309497000  | 6 | 3.612640000  | -3.987853000 | 1.614316000  |
| 6 | -4.667735000 | 2.241751000  | -0.023821000 | 6 | 2.955604000  | -6.718944000 | 1.784092000  |
| 1 | -5.727594000 | 2.291691000  | -0.227233000 | 1 | 1.881718000  | -6.386963000 | -0.047089000 |
| 6 | -3.739162000 | 3.319350000  | -0.067615000 | 6 | 4.067378000  | -4.759132000 | 2.686892000  |
| 1 | -3.955120000 | 4.349691000  | -0.316641000 | 1 | 3.884217000  | -2.939977000 | 1.540949000  |
| 6 | -2.492024000 | 2.812646000  | 0.248065000  | 6 | 3.742956000  | -6.110531000 | 2.772851000  |
| 6 | -1.142743000 | 3.501269000  | 0.316495000  | 1 | 4.681734000  | -4.300371000 | 3.456646000  |
| 6 | -1.095119000 | 2.341395000  | -2.525721000 | 1 | 4.104879000  | -6.702672000 | 3.609883000  |
| 1 | -1.442308000 | 3.376048000  | -2.587163000 | 6 | 2.628109000  | -8.192279000 | 1.855681000  |
| 1 | -1.944989000 | 1.707271000  | -2.258811000 | 1 | 3.489447000  | -8.805460000 | 1.563222000  |
| 1 | -0.719449000 | 2.044750000  | -3.506412000 | 1 | 2.351216000  | -8.491300000 | 2.871951000  |
| 6 | -5.633437000 | -0.750560000 | -0.280048000 | 1 | 1.799777000  | -8.451250000 | 1.190371000  |
| 6 | -5.792595000 | -0.375856000 | -1.619351000 | 1 | -1.253631000 | 4.406403000  | -0.291323000 |
| 6 | -6.607534000 | -1.578413000 | 0.290992000  | 6 | -0.825104000 | 4.003966000  | 1.723841000  |
| 6 | -6.886715000 | -0.823118000 | -2.360621000 | 6 | -0.674776000 | 5.368146000  | 1.987662000  |
| 1 | -5.070522000 | 0.291810000  | -2.078133000 | 6 | -0.698630000 | 3.170411000  | 2.838750000  |
| 6 | -7.700483000 | -2.020815000 | -0.450643000 | 6 | -0.422262000 | 5.888519000  | 3.251658000  |
| 1 | -6.510389000 | -1.879242000 | 1.331363000  | 6 | -0.444614000 | 3.633035000  | 4.123317000  |
| 6 | -7.858758000 | -1.655657000 | -1.793937000 | 6 | -0.307591000 | 5.006574000  | 4.324488000  |
| 1 | -6.989471000 | -0.511712000 | -3.397367000 | 1 | -0.319844000 | 6.960638000  | 3.372553000  |
| 1 | -8.445165000 | -2.655957000 | 0.022956000  | 1 | -0.359182000 | 2.919905000  | 4.934994000  |
| 6 | -9.028922000 | -2.158993000 | -2.605303000 | 1 | -0.109820000 | 5.389317000  | 5.320287000  |
| 1 | -8.826076000 | -3.155055000 | -3.018389000 | 9 | -0.821173000 | 1.833167000  | 2.662024000  |
| 1 | -9.933870000 | -2.241003000 | -1.995344000 | 9 | -0.783396000 | 6.236457000  | 0.955318000  |
| 1 | -9.247395000 | -1.495835000 | -3.447313000 |   |              |              |              |
